# Supplementary material for: MARVEL analysis of the rotational–vibrational states of the molecular ions H2D+ and D2H+
Source: Royal Society of Chemistry journal article supplement (doi:10.1039/c3cp44610g), 2013-01-01
Supplement: c3cp44610g.xlsx [file c3cp44610g.xlsx]

## Sheet: J=0
Evib	n1	n2	n3	sym
3635.55	0	0	0	A1
5603.66	0	1	0	A1
5713.95	0	0	1	B2
6372.49	1	0	0	A1
7456.76	0	2	0	A1
7678.25	0	0	2	A1
7696.29	0	1	1	B2
8284.31	-2	-2	1	A1
8310.43	-2	-2	2	B2
9020.9	-2	-2	3	A1
9214.75	-2	-2	4	A1
9467.88	-2	-2	5	B2
9638.1	-2	-2	6	B2
9644.07	-2	-2	7	A1
10068.1	1	2	0	A1
10135.6	1	0	2	A1
10251.5	-2	-2	8	B2
10821.8	-2	-2	9	B2
10870.3	-2	-2	10	A1
10874	-2	-2	11	A1

## Sheet: J=1
A1 symmetry										A2 symmetry										B1 symmetry										B2 symmetry
Erovib	n1	n2	n3	J	Ka	Kc	RRD^2	FullVib		Erovib	n1	n2	n3	J	Ka	Kc	RRD^2	FullVib		Erovib	n1	n2	n3	J	Ka	Kc	RRD^2	FullVib		Erovib	n1	n2	n3	J	Ka	Kc	RRD^2	FullVib
2136.21	0	0	1	1	1	0	1	1		49.26	0	0	0	1	1	1	0.996	0.996		34.92	0	0	0	1	0	1	0.996	0.996		57.99	0	0	0	1	1	0	1	1
	0	0	1	1	1	0	1				0	0	0	1	1	1	0.996				0	0	0	1	0	1	0.996				0	0	0	1	1	0	1
	-2	-2	2	1	1	0	0				0	0	1	1	0	1	0.004				0	0	1	1	1	1	0.004				1	0	0	1	1	0	0
	-2	-2	5	1	1	0	0				-2	-2	2	1	0	1	0				-2	-2	2	1	1	1	0				0	0	2	1	1	0	0
4119.07	0	1	1	1	1	0	1	1		2014.06	0	1	0	1	1	1	0.946	0.946		1998.49	0	1	0	1	0	1	0.969	0.969		2027	0	1	0	1	1	0	1	1
	0	1	1	1	1	0	1				0	1	0	1	1	1	0.946				0	1	0	1	0	1	0.969				0	1	0	1	1	0	1
	-2	-2	8	1	1	0	0				0	0	1	1	0	1	0.05				0	0	1	1	1	1	0.027				-2	-2	1	1	1	0	0
	-2	-2	2	1	1	0	0				0	1	1	1	0	1	0.003				0	1	1	1	1	1	0.003				-2	-2	4	1	1	0	0
4732.1	-2	-2	2	1	1	0	1	1		2118.55	0	0	1	1	0	1	0.938	0.938		2128.66	0	0	1	1	1	1	0.96	0.96		2793.92	1	0	0	1	1	0	1	1
	-2	-2	2	1	1	0	1				0	0	1	1	0	1	0.938				0	0	1	1	1	1	0.96				1	0	0	1	1	0	1
	-2	-2	9	1	1	0	0				0	1	0	1	1	1	0.051				0	1	0	1	0	1	0.028				-2	-2	3	1	1	0	0
	0	0	1	1	1	0	0				0	0	2	1	1	1	0.007				0	0	2	1	0	1	0.008				0	0	0	1	1	0	0
5892.4	-2	-2	5	1	1	0	1	1		2785.3	1	0	0	1	1	1	0.996	0.996		2771.48	1	0	0	1	0	1	0.996	0.996		3881.63	0	2	0	1	1	0	1	1
	-2	-2	5	1	1	0	1				1	0	0	1	1	1	0.996				1	0	0	1	0	1	0.996				0	2	0	1	1	0	1
	-2	-2	8	1	1	0	0				-2	-2	2	1	0	1	0.004				-2	-2	2	1	1	1	0.004				1	2	0	1	1	0	0
	0	0	1	1	1	0	0				-2	-2	9	1	0	1	0				0	0	1	1	1	1	0				1	0	2	1	1	0	0
6061.09	-2	-2	6	1	1	0	1	1		3871.3	0	2	0	1	1	1	0.981	0.981		3851.88	0	2	0	1	0	1	0.987	0.987		4101.01	0	0	2	1	1	0	1	1
	-2	-2	6	1	1	0	1				0	2	0	1	1	1	0.981				0	2	0	1	0	1	0.987				0	0	2	1	1	0	1
	0	1	1	1	1	0	0				0	1	1	1	0	1	0.015				0	1	1	1	1	1	0.01				1	0	2	1	1	0	0
	-2	-2	2	1	1	0	0				-2	-2	5	1	0	1	0.002				-2	-2	5	1	1	1	0.002				-2	-2	7	1	1	0	0
6673.58	-2	-2	8	1	1	0	1	1		4062.83	0	0	2	1	1	1	0.572	0.572		4058.42	0	0	2	1	0	1	0.718	0.718		4706.74	-2	-2	1	1	1	0	1	1
	-2	-2	8	1	1	0	1				0	0	2	1	1	1	0.572				0	0	2	1	0	1	0.718				-2	-2	1	1	1	0	1
	0	1	1	1	1	0	0				0	1	1	1	0	1	0.402				0	1	1	1	1	1	0.259				-2	-2	11	1	1	0	0
	-2	-2	5	1	1	0	0				0	2	0	1	1	1	0.007				0	0	1	1	1	1	0.007				0	1	0	1	1	0	0
7242.95	-2	-2	9	1	1	0	1	1		4122.9	0	1	1	1	0	1	0.572	0.572		4130.74	0	1	1	1	1	1	0.72	0.72		5441.29	-2	-2	3	1	1	0	1	1
	-2	-2	9	1	1	0	1				0	1	1	1	0	1	0.572				0	1	1	1	1	1	0.72				-2	-2	3	1	1	0	1
	-2	-2	2	1	1	0	0				0	0	2	1	1	1	0.405				0	0	2	1	0	1	0.26				1	0	0	1	1	0	0
	-2	-2	8	1	1	0	0				0	2	0	1	1	1	0.008				-2	-2	7	1	0	1	0.006				-2	-2	1	1	1	0	0
										4681.79	-2	-2	1	1	1	1	0.611	0.611		4673.42	-2	-2	1	1	0	1	0.839	0.839		5641.96	-2	-2	4	1	1	0	1	1
											-2	-2	1	1	1	1	0.611				-2	-2	1	1	0	1	0.839				-2	-2	4	1	1	0	1
											-2	-2	2	1	0	1	0.381				-2	-2	2	1	1	1	0.156				-2	-2	10	1	1	0	0
											1	0	2	1	1	1	0.002				-2	-2	8	1	1	1	0.003				1	2	0	1	1	0	0
										4727	-2	-2	2	1	0	1	0.605	0.605		4729.67	-2	-2	2	1	1	1	0.829	0.829		6067.72	-2	-2	7	1	1	0	1	1
											-2	-2	2	1	0	1	0.605				-2	-2	2	1	1	1	0.829				-2	-2	7	1	1	0	1
											-2	-2	1	1	1	1	0.385				-2	-2	1	1	0	1	0.158				1	2	0	1	1	0	0
											1	0	2	1	1	1	0.003				1	0	2	1	0	1	0.005				1	0	2	1	1	0	0
										5432.66	-2	-2	3	1	1	1	0.995	0.995		5419.51	-2	-2	3	1	0	1	0.996	0.996		6491.85	1	2	0	1	1	0	1	1
											-2	-2	3	1	1	1	0.995				-2	-2	3	1	0	1	0.996				1	2	0	1	1	0	1
											-2	-2	9	1	0	1	0.004				-2	-2	9	1	1	1	0.004				1	0	2	1	1	0	0
											-2	-2	2	1	0	1	0				-2	-2	2	1	1	1	0				0	2	0	1	1	0	0
										5632.13	-2	-2	4	1	1	1	0.984	0.984		5608.26	-2	-2	4	1	0	1	0.989	0.989		6558.85	1	0	2	1	1	0	1	1
											-2	-2	4	1	1	1	0.984				-2	-2	4	1	0	1	0.989				1	0	2	1	1	0	1
											-2	-2	5	1	0	1	0.009				-2	-2	5	1	1	1	0.005				1	2	0	1	1	0	0
											-2	-2	6	1	0	1	0.004				-2	-2	6	1	1	1	0.003				0	0	2	1	1	0	0
										5869.76	-2	-2	5	1	0	1	0.966	0.966		5879.93	-2	-2	5	1	1	1	0.965	0.965		7294.89	-2	-2	11	1	1	0	0.746	0.746
											-2	-2	5	1	0	1	0.966				-2	-2	5	1	1	1	0.965				-2	-2	11	1	1	0	0.746
											-2	-2	4	1	1	1	0.009				0	0	2	1	0	1	0.007				-2	-2	10	1	1	0	0.254
											0	0	2	1	1	1	0.008				-2	-2	4	1	0	1	0.005				-2	-2	1	1	1	0	0
										5998.44	-2	-2	6	1	0	1	0.584	0.584		5999.95	-2	-2	7	1	0	1	0.526	0.526		7301.89	-2	-2	10	1	1	0	0.746	0.746
											-2	-2	6	1	0	1	0.584				-2	-2	7	1	0	1	0.526				-2	-2	10	1	1	0	0.746
											-2	-2	7	1	1	1	0.394				-2	-2	6	1	1	1	0.452				-2	-2	11	1	1	0	0.254
											0	0	2	1	1	1	0.004				0	1	1	1	1	1	0.004				-2	-2	4	1	1	0	0
										6094.26	-2	-2	7	1	1	1	0.585	0.585		6093.85	-2	-2	6	1	1	1	0.524	0.524
											-2	-2	7	1	1	1	0.585				-2	-2	6	1	1	1	0.524
											-2	-2	6	1	0	1	0.393				-2	-2	7	1	0	1	0.452
											0	1	1	1	0	1	0.004				0	1	1	1	1	1	0.003
										6481.95	1	2	0	1	1	1	0.981	0.981		6465.95	1	2	0	1	0	1	0.981	0.981
											1	2	0	1	1	1	0.981				1	2	0	1	0	1	0.981
											-2	-2	8	1	0	1	0.006				-2	-2	8	1	1	1	0.004
											-2	-2	2	1	0	1	0.003				1	0	2	1	0	1	0.004
										6536.24	1	0	2	1	1	1	0.892	0.892		6524.85	1	0	2	1	0	1	0.914	0.914
											1	0	2	1	1	1	0.892				1	0	2	1	0	1	0.914
											-2	-2	8	1	0	1	0.088				-2	-2	8	1	1	1	0.062
											-2	-2	2	1	0	1	0.005				-2	-2	2	1	1	1	0.006
										6661.59	-2	-2	8	1	0	1	0.895	0.895		6673.36	-2	-2	8	1	1	1	0.922	0.922
											-2	-2	8	1	0	1	0.895				-2	-2	8	1	1	1	0.922
											1	0	2	1	1	1	0.087				1	0	2	1	0	1	0.063
											1	2	0	1	1	1	0.006				-2	-2	1	1	0	1	0.003
										7214.61	-2	-2	9	1	0	1	0.908	0.908		7223.15	-2	-2	9	1	1	1	0.844	0.844
											-2	-2	9	1	0	1	0.908				-2	-2	9	1	1	1	0.844
											-2	-2	11	1	1	1	0.065				-2	-2	11	1	0	1	0.12
											-2	-2	10	1	1	1	0.011				-2	-2	10	1	0	1	0.021
										7292.2	-2	-2	10	1	1	1	0.912	0.912		7263.09	-2	-2	10	1	0	1	0.898	0.898
											-2	-2	10	1	1	1	0.912				-2	-2	10	1	0	1	0.898
											-2	-2	11	1	1	1	0.053				-2	-2	11	1	0	1	0.093
											-2	-2	9	1	0	1	0.026				-2	-2	9	1	1	1	0.001
										7294.34	-2	-2	11	1	1	1	0.877	0.877		7279.17	-2	-2	11	1	0	1	0.783	0.783
											-2	-2	11	1	1	1	0.877				-2	-2	11	1	0	1	0.783
											-2	-2	10	1	1	1	0.068				-2	-2	9	1	1	1	0.138
											-2	-2	9	1	0	1	0.049				-2	-2	10	1	0	1	0.074

## Sheet: J=2
A1 symmetry										A2 symmetry										B1 symmetry										B2 symmetry
Erovib	n1	n2	n3	J	Ka	Kc	RRD^2	FullVib		Erovib	n1	n2	n3	J	Ka	Kc	RRD^2	FullVib		Erovib	n1	n2	n3	J	Ka	Kc	RRD^2	FullVib		Erovib	n1	n2	n3	J	Ka	Kc	RRD^2	FullVib
101.72	0	0	0	2	0	2	0.987	0.987		136.37	0	0	0	2	1	1	0.997	0.997		179.17	0	0	0	2	2	1	0.995	0.995		110.26	0	0	0	2	1	2	0.985	0.985
	0	0	0	2	0	2	0.987				0	0	0	2	1	1	0.997				0	0	0	2	2	1	0.995				0	0	0	2	1	2	0.985
	0	0	1	2	1	2	0.013				0	0	1	2	2	1	0.003				0	0	1	2	1	1	0.005				0	0	1	2	0	2	0.014
	-2	-2	2	2	1	2	0				0	1	0	2	1	1	0				1	0	0	2	2	1	0				0	0	1	2	2	0	0.001
182.07	0	0	0	2	2	0	0.998	0.998		2099.88	0	1	0	2	1	1	0.981	0.981		2145.58	0	1	0	2	2	1	0.891	0.891		2062.89	0	1	0	2	1	2	0.863	0.863
	0	0	0	2	2	0	0.998				0	1	0	2	1	1	0.981				0	1	0	2	2	1	0.891				0	1	0	2	1	2	0.863
	0	0	1	2	1	2	0.002				0	0	1	2	2	1	0.016				0	0	1	2	1	1	0.104				0	0	1	2	0	2	0.116
	1	0	0	2	2	0	0				0	1	1	2	2	1	0.003				0	1	1	2	1	1	0.003				0	1	1	2	0	2	0.01
2055.05	0	1	0	2	0	2	0.897	0.897		2254.64	0	0	1	2	2	1	0.97	0.97		2225.12	0	0	1	2	1	1	0.885	0.885		2194.03	0	0	1	2	0	2	0.839	0.839
	0	1	0	2	0	2	0.897				0	0	1	2	2	1	0.97				0	0	1	2	1	1	0.885				0	0	1	2	0	2	0.839
	0	0	1	2	1	2	0.089				0	1	0	2	1	1	0.016				0	1	0	2	2	1	0.104				0	1	0	2	1	2	0.12
	0	1	1	2	1	2	0.01				0	0	2	2	1	1	0.01				0	0	2	2	2	1	0.006				0	0	2	2	1	2	0.024
2149.52	0	1	0	2	2	0	0.881	0.895		2871.44	1	0	0	2	1	1	0.996	0.996		2912.67	1	0	0	2	2	1	0.995	0.995		2257.55	0	0	1	2	2	0	0.99	0.991
	0	1	0	2	2	0	0.881				1	0	0	2	1	1	0.996				1	0	0	2	2	1	0.995				0	0	1	2	2	0	0.99
	0	0	1	2	1	2	0.098				-2	-2	2	2	2	1	0.003				-2	-2	2	2	1	1	0.005				0	0	2	2	1	2	0.004
	0	1	0	2	0	2	0.015				0	0	1	2	2	1	0				-2	-2	3	2	2	1	0				0	1	0	2	1	2	0.003
2202.74	0	0	1	2	1	2	0.764	0.764		3952.83	0	2	0	2	1	1	0.99	0.99		4010.43	0	2	0	2	2	1	0.97	0.97		2845.68	1	0	0	2	1	2	0.984	0.984
	0	0	1	2	1	2	0.764				0	2	0	2	1	1	0.99				0	2	0	2	2	1	0.97				1	0	0	2	1	2	0.984
	0	1	0	2	2	0	0.117				0	1	1	2	2	1	0.006				0	1	1	2	1	1	0.025				-2	-2	2	2	0	2	0.014
	0	1	0	2	0	2	0.077				-2	-2	5	2	2	1	0.002				-2	-2	5	2	1	1	0.003				-2	-2	2	2	2	0	0.001
2837.52	1	0	0	2	0	2	0.986	0.986		4168.02	0	0	2	2	1	1	0.804	0.804		4179.71	0	1	1	2	1	1	0.591	0.591		3921.89	0	2	0	2	1	2	0.933	0.933
	1	0	0	2	0	2	0.986				0	0	2	2	1	1	0.804				0	1	1	2	1	1	0.591				0	2	0	2	1	2	0.933
	-2	-2	2	2	1	2	0.013				0	1	1	2	2	1	0.174				0	0	2	2	2	1	0.378				0	1	1	2	0	2	0.048
	-2	-2	9	2	1	2	0				0	0	1	2	2	1	0.008				0	2	0	2	2	1	0.015				-2	-2	5	2	0	2	0.006
2915.58	1	0	0	2	2	0	0.997	0.997		4257.32	0	1	1	2	2	1	0.808	0.808		4235.58	0	0	2	2	2	1	0.597	0.597		4097.83	0	0	2	2	1	2	0.56	0.56
	1	0	0	2	2	0	0.997				0	1	1	2	2	1	0.808				0	0	2	2	2	1	0.597				0	0	2	2	1	2	0.56
	-2	-2	2	2	1	2	0.002				0	0	2	2	1	1	0.174				0	1	1	2	1	1	0.374				0	1	1	2	0	2	0.326
	-2	-2	3	2	2	0	0				-2	-2	7	2	1	1	0.008				0	2	0	2	2	1	0.01				0	2	0	2	1	2	0.031
3909.84	0	2	0	2	0	2	0.948	0.949		4776.05	-2	-2	1	2	1	1	0.929	0.929		4796.86	-2	-2	2	2	1	1	0.68	0.68		4207.92	0	1	1	2	0	2	0.545	0.689
	0	2	0	2	0	2	0.948				-2	-2	1	2	1	1	0.929				-2	-2	2	2	1	1	0.68				0	1	1	2	0	2	0.545
	0	1	1	2	1	2	0.036				-2	-2	2	2	2	1	0.068				-2	-2	1	2	2	1	0.309				0	0	2	2	1	2	0.256
	-2	-2	5	2	1	2	0.006				-2	-2	8	2	2	1	0.002				1	0	0	2	2	1	0.004				0	1	1	2	2	0	0.144
4013.08	0	2	0	2	2	0	0.973	0.973		4851.17	-2	-2	2	2	2	1	0.917	0.917		4847.25	-2	-2	1	2	2	1	0.686	0.686		4252.32	0	1	1	2	2	0	0.836	0.88
	0	2	0	2	2	0	0.973				-2	-2	2	2	2	1	0.917				-2	-2	1	2	2	1	0.686				0	1	1	2	2	0	0.836
	0	1	1	2	1	2	0.022				-2	-2	1	2	1	1	0.068				-2	-2	2	2	1	1	0.306				0	0	2	2	1	2	0.094
	0	0	2	2	0	2	0.002				1	0	2	2	1	1	0.007				-2	-2	8	2	1	1	0.003				0	1	1	2	0	2	0.044
4096.99	0	0	2	2	0	2	0.575	0.59		5518.05	-2	-2	3	2	1	1	0.996	0.996		5557.27	-2	-2	3	2	2	1	0.994	0.994		4723.59	-2	-2	1	2	1	2	0.58	0.58
	0	0	2	2	0	2	0.575				-2	-2	3	2	1	1	0.996				-2	-2	3	2	2	1	0.994				-2	-2	1	2	1	2	0.58
	0	1	1	2	1	2	0.303				-2	-2	9	2	2	1	0.003				-2	-2	9	2	1	1	0.005				-2	-2	2	2	0	2	0.383
	-2	-2	5	2	1	2	0.023				-2	-2	2	2	2	1	0				1	0	0	2	2	1	0				1	0	2	2	1	2	0.008
4213.93	0	0	2	2	2	0	0.469	0.716		5709.48	-2	-2	4	2	1	1	0.992	0.992		5780.05	-2	-2	4	2	2	1	0.974	0.974		4807.72	-2	-2	2	2	0	2	0.567	0.573
	0	0	2	2	2	0	0.469				-2	-2	4	2	1	1	0.992				-2	-2	4	2	2	1	0.974				-2	-2	2	2	0	2	0.567
	0	1	1	2	1	2	0.256				-2	-2	5	2	2	1	0.003				-2	-2	5	2	1	1	0.015				-2	-2	1	2	1	2	0.393
	0	0	2	2	0	2	0.248				-2	-2	6	2	2	1	0.002				-2	-2	6	2	1	1	0.006				1	0	2	2	1	2	0.011
4229.75	0	0	2	2	2	0	0.505	0.601		6009.15	-2	-2	5	2	2	1	0.957	0.957		5979.11	-2	-2	5	2	1	1	0.96	0.96		4852.2	-2	-2	2	2	2	0	0.979	0.979
	0	0	2	2	2	0	0.505				-2	-2	5	2	2	1	0.957				-2	-2	5	2	1	1	0.96				-2	-2	2	2	2	0	0.979
	0	1	1	2	1	2	0.34				-2	-2	7	2	1	1	0.01				-2	-2	4	2	2	1	0.016				-2	-2	1	2	1	2	0.013
	0	0	2	2	0	2	0.096				0	0	2	2	1	1	0.006				0	0	2	2	2	1	0.009				1	0	2	2	1	2	0.003
4720.51	-2	-2	1	2	0	2	0.664	0.667		6115.8	-2	-2	7	2	1	1	0.639	0.639		6110.96	-2	-2	6	2	1	1	0.701	0.701		5492.26	-2	-2	3	2	1	2	0.981	0.981
	-2	-2	1	2	0	2	0.664				-2	-2	7	2	1	1	0.639				-2	-2	6	2	1	1	0.701				-2	-2	3	2	1	2	0.981
	-2	-2	2	2	1	2	0.307				-2	-2	6	2	2	1	0.336				-2	-2	7	2	2	1	0.276				-2	-2	9	2	0	2	0.015
	-2	-2	8	2	1	2	0.007				0	1	1	2	2	1	0.006				0	0	2	2	2	1	0.005				-2	-2	9	2	2	0	0.001
4798.73	-2	-2	2	2	1	2	0.517	0.517		6214.45	-2	-2	6	2	2	1	0.638	0.638		6215.83	-2	-2	7	2	2	1	0.702	0.702		5680.29	-2	-2	4	2	1	2	0.946	0.946
	-2	-2	2	2	1	2	0.517				-2	-2	6	2	2	1	0.638				-2	-2	7	2	2	1	0.702				-2	-2	4	2	1	2	0.946
	-2	-2	1	2	0	2	0.29				-2	-2	7	2	1	1	0.332				-2	-2	6	2	1	1	0.275				-2	-2	5	2	0	2	0.025
	-2	-2	1	2	2	0	0.159				-2	-2	5	2	2	1	0.007				0	1	1	2	1	1	0.004				-2	-2	6	2	0	2	0.015
4840.35	-2	-2	1	2	2	0	0.836	0.869		6567.61	1	2	0	2	1	1	0.973	0.973		6614.68	1	2	0	2	2	1	0.963	0.963		5937.77	-2	-2	5	2	0	2	0.872	0.877
	-2	-2	1	2	2	0	0.836				1	2	0	2	1	1	0.973				1	2	0	2	2	1	0.963				-2	-2	5	2	0	2	0.872
	-2	-2	2	2	1	2	0.12				1	0	2	2	1	1	0.014				1	0	2	2	2	1	0.012				0	0	2	2	1	2	0.029
	-2	-2	1	2	0	2	0.033				-2	-2	2	2	2	1	0.003				-2	-2	8	2	1	1	0.007				-2	-2	4	2	1	2	0.026
5484.65	-2	-2	3	2	0	2	0.984	0.984		6630.64	1	0	2	2	1	1	0.917	0.917		6664.35	1	0	2	2	2	1	0.832	0.832		6013.35	-2	-2	5	2	2	0	0.582	0.589
	-2	-2	3	2	0	2	0.984				1	0	2	2	1	1	0.917				1	0	2	2	2	1	0.832				-2	-2	5	2	2	0	0.582
	-2	-2	9	2	1	2	0.014				-2	-2	8	2	2	1	0.048				-2	-2	8	2	1	1	0.143				-2	-2	7	2	1	2	0.218
	-2	-2	2	2	1	2	0.001				1	2	0	2	1	1	0.013				1	2	0	2	2	1	0.007				-2	-2	6	2	0	2	0.157
5560.28	-2	-2	3	2	2	0	0.997	0.997		6800.73	-2	-2	8	2	2	1	0.936	0.936		6766.43	-2	-2	8	2	1	1	0.838	0.838		6017.79	-2	-2	5	2	2	0	0.389	0.395
	-2	-2	3	2	2	0	0.997				-2	-2	8	2	2	1	0.936				-2	-2	8	2	1	1	0.838				-2	-2	5	2	2	0	0.389
	-2	-2	9	2	1	2	0.002				1	0	2	2	1	1	0.049				1	0	2	2	2	1	0.134				-2	-2	6	2	0	2	0.31
	1	0	0	2	2	0	0				-2	-2	1	2	1	1	0.003				1	2	0	2	2	1	0.016				-2	-2	7	2	1	2	0.223
5663.92	-2	-2	4	2	0	2	0.957	0.96		7342.38	-2	-2	9	2	2	1	0.67	0.67		7318.39	-2	-2	9	2	1	1	0.935	0.935		6171.72	-2	-2	6	2	2	0	0.599	0.849
	-2	-2	4	2	0	2	0.957				-2	-2	9	2	2	1	0.67				-2	-2	9	2	1	1	0.935				-2	-2	6	2	2	0	0.599
	-2	-2	5	2	1	2	0.018				-2	-2	11	2	1	1	0.265				-2	-2	11	2	2	1	0.042				-2	-2	6	2	0	2	0.251
	-2	-2	6	2	1	2	0.012				-2	-2	10	2	1	1	0.05				-2	-2	10	2	2	1	0.006				-2	-2	7	2	1	2	0.132
5782.17	-2	-2	4	2	2	0	0.978	0.978		7365.92	-2	-2	10	2	1	1	0.883	0.883		7422.61	-2	-2	11	2	2	1	0.808	0.808		6212.71	-2	-2	6	2	2	0	0.373	0.574
	-2	-2	4	2	2	0	0.978				-2	-2	10	2	1	1	0.883				-2	-2	11	2	2	1	0.808				-2	-2	6	2	2	0	0.373
	-2	-2	5	2	1	2	0.013				-2	-2	11	2	1	1	0.108				-2	-2	10	2	2	1	0.138				-2	-2	7	2	1	2	0.348
	-2	-2	6	2	1	2	0.004				-2	-2	9	2	2	1	0.002				-2	-2	9	2	1	1	0.048				-2	-2	6	2	0	2	0.2
5942.15	-2	-2	5	2	1	2	0.861	0.861		7381.01	-2	-2	11	2	1	1	0.623	0.623		7453.46	-2	-2	10	2	2	1	0.839	0.839		6538.4	1	2	0	2	1	2	0.903	0.903
	-2	-2	5	2	1	2	0.861				-2	-2	11	2	1	1	0.623				-2	-2	10	2	2	1	0.839				1	2	0	2	1	2	0.903
	0	0	2	2	0	2	0.026				-2	-2	9	2	2	1	0.308				-2	-2	11	2	2	1	0.143				-2	-2	8	2	0	2	0.033
	-2	-2	4	2	0	2	0.019				-2	-2	10	2	1	1	0.061				-2	-2	4	2	2	1	0.001				1	0	2	2	1	2	0.024
6016.56	-2	-2	7	2	0	2	0.444	0.462																						6570.79	1	0	2	2	1	2	0.727	0.727
	-2	-2	6	2	1	2	0.454																								1	0	2	2	1	2	0.727
	-2	-2	7	2	0	2	0.444																								-2	-2	8	2	0	2	0.148
	-2	-2	7	2	2	0	0.018																								1	2	0	2	1	2	0.031
6178.08	-2	-2	7	2	2	0	0.509	0.819																						6745.67	-2	-2	8	2	0	2	0.768	0.798
	-2	-2	7	2	2	0	0.509																								-2	-2	8	2	0	2	0.768
	-2	-2	7	2	0	2	0.31																								1	0	2	2	1	2	0.148
	-2	-2	6	2	1	2	0.153																								-2	-2	8	2	2	0	0.03
6213.13	-2	-2	7	2	2	0	0.462	0.636																						6799.67	-2	-2	8	2	2	0	0.954	0.963
	-2	-2	7	2	2	0	0.462																								-2	-2	8	2	2	0	0.954
	-2	-2	6	2	1	2	0.299																								1	0	2	2	1	2	0.024
	-2	-2	7	2	0	2	0.174																								-2	-2	8	2	0	2	0.009
6527.98	1	2	0	2	0	2	0.898	0.899																						7264.19	-2	-2	9	2	0	2	0.748	0.758
	1	2	0	2	0	2	0.898																								-2	-2	9	2	0	2	0.748
	1	0	2	2	0	2	0.043																								-2	-2	11	2	1	2	0.162
	-2	-2	8	2	1	2	0.027																								-2	-2	10	2	1	2	0.026
6567.69	1	0	2	2	0	2	0.716	0.728																						7339.74	-2	-2	10	2	1	2	0.851	0.851
	1	0	2	2	0	2	0.716																								-2	-2	10	2	1	2	0.851
	-2	-2	8	2	1	2	0.137																								-2	-2	11	2	1	2	0.11
	1	2	0	2	0	2	0.045																								-2	-2	9	2	0	2	0
6618.1	1	2	0	2	2	0	0.972	0.973																						7356.19	-2	-2	9	2	2	0	0.644	0.758
	1	2	0	2	2	0	0.972																								-2	-2	9	2	2	0	0.644
	-2	-2	8	2	1	2	0.013																								-2	-2	11	2	1	2	0.213
	1	0	2	2	2	0	0.005																								-2	-2	9	2	0	2	0.114
6679.52	1	0	2	2	2	0	0.913	0.957																						7369.9	-2	-2	11	2	1	2	0.496	0.496
	1	0	2	2	2	0	0.913																								-2	-2	11	2	1	2	0.496
	1	0	2	2	0	2	0.043																								-2	-2	9	2	2	0	0.337
	-2	-2	8	2	1	2	0.035																								-2	-2	9	2	0	2	0.078
6758.48	-2	-2	8	2	1	2	0.74	0.74
	-2	-2	8	2	1	2	0.74
	1	0	2	2	0	2	0.129
	1	0	2	2	2	0	0.058
7266.61	-2	-2	9	2	1	2	0.72	0.72
	-2	-2	9	2	1	2	0.72
	-2	-2	11	2	0	2	0.188
	-2	-2	10	2	0	2	0.031
7317.18	-2	-2	10	2	0	2	0.848	0.855
	-2	-2	10	2	0	2	0.848
	-2	-2	11	2	0	2	0.116
	-2	-2	10	2	2	0	0.007
7354.48	-2	-2	11	2	0	2	0.672	0.692
	-2	-2	11	2	0	2	0.672
	-2	-2	9	2	1	2	0.193
	-2	-2	10	2	0	2	0.087
7421.89	-2	-2	11	2	2	0	0.827	0.835
	-2	-2	11	2	2	0	0.827
	-2	-2	10	2	2	0	0.14
	-2	-2	9	2	1	2	0.018
7454.96	-2	-2	10	2	2	0	0.838	0.842
	-2	-2	10	2	2	0	0.838
	-2	-2	11	2	2	0	0.142
	-2	-2	10	2	0	2	0.004

## Sheet: J=3
A1 symmetry										A2 symmetry										B1 symmetry										B2 symmetry
Erovib	n1	n2	n3	J	Ka	Kc	RRD^2	FullVib		Erovib	n1	n2	n3	J	Ka	Kc	RRD^2	FullVib		Erovib	n1	n2	n3	J	Ka	Kc	RRD^2	FullVib		Erovib	n1	n2	n3	J	Ka	Kc	RRD^2	FullVib
283.32	0	0	0	3	2	2	0.984	0.984		200.02	0	0	0	3	1	3	0.965	0.967		196.09	0	0	0	3	0	3	0.969	0.969		251.31	0	0	0	3	1	2	0.989	0.99
	0	0	0	3	2	2	0.984				0	0	0	3	1	3	0.965				0	0	0	3	0	3	0.969				0	0	0	3	1	2	0.989
	0	0	1	3	1	2	0.013				0	0	1	3	0	3	0.031				0	0	1	3	1	3	0.03				0	0	1	3	2	2	0.009
	0	0	1	3	3	0	0.003				0	0	0	3	3	1	0.002				-2	-2	2	3	1	3	0				0	0	0	3	3	0	0.001
2236.32	0	1	0	3	2	2	0.829	0.829		377.13	0	0	0	3	3	1	0.991	0.992		296.05	0	0	0	3	2	1	0.994	0.994		377.76	0	0	0	3	3	0	0.991	0.993
	0	1	0	3	2	2	0.829				0	0	0	3	3	1	0.991				0	0	0	3	2	1	0.994				0	0	0	3	3	0	0.991
	0	0	1	3	1	2	0.145				0	0	1	3	2	1	0.006				0	0	1	3	1	3	0.003				0	0	1	3	2	2	0.006
	0	0	1	3	3	0	0.009				0	0	0	3	1	3	0.001				0	0	1	3	3	1	0.003				0	0	0	3	1	2	0.002
2350.94	0	0	1	3	1	2	0.816	0.816		2136.44	0	1	0	3	1	3	0.779	0.78		2133.45	0	1	0	3	0	3	0.799	0.8		2205.75	0	1	0	3	1	2	0.938	0.94
	0	0	1	3	1	2	0.816				0	1	0	3	1	3	0.779				0	1	0	3	0	3	0.799				0	1	0	3	1	2	0.938
	0	1	0	3	2	2	0.151				0	0	1	3	0	3	0.177				0	0	1	3	1	3	0.162				0	0	1	3	2	2	0.049
	0	0	2	3	2	2	0.017				0	1	1	3	0	3	0.019				0	1	1	3	1	3	0.019				0	1	1	3	2	2	0.007
2446.95	0	0	1	3	3	0	0.972	0.978		2297.54	0	0	1	3	0	3	0.699	0.704		2253.01	0	1	0	3	2	1	0.818	0.855		2334.65	0	1	0	3	3	0	0.522	0.558
	0	0	1	3	3	0	0.972				0	0	1	3	0	3	0.699				0	1	0	3	2	1	0.818				0	1	0	3	3	0	0.522
	0	0	2	3	2	2	0.011				0	1	0	3	1	3	0.183				0	0	1	3	1	3	0.12				0	0	1	3	2	2	0.417
	0	1	0	3	2	2	0.006				0	0	2	3	1	3	0.051				0	1	0	3	0	3	0.036				0	1	0	3	1	2	0.036
3015.78	1	0	0	3	2	2	0.983	0.983		2339.7	0	1	0	3	3	1	0.611	0.615		2306.7	0	0	1	3	1	3	0.611	0.616		2389.47	0	1	0	3	3	0	0.469	0.486
	1	0	0	3	2	2	0.983				0	1	0	3	3	1	0.611				0	0	1	3	1	3	0.611				0	0	1	3	2	2	0.483
	-2	-2	2	3	1	2	0.013				0	0	1	3	2	1	0.351				0	1	0	3	2	1	0.166				0	1	0	3	3	0	0.469
	-2	-2	2	3	3	0	0.003				0	0	1	3	0	3	0.025				0	1	0	3	0	3	0.137				0	1	0	3	1	2	0.017
4100.75	0	2	0	3	2	2	0.922	0.922		2397.48	0	0	1	3	2	1	0.621	0.621		2446.18	0	0	1	3	3	1	0.971	0.971		2985.06	1	0	0	3	1	2	0.988	0.989
	0	2	0	3	2	2	0.922				0	0	1	3	2	1	0.621				0	0	1	3	3	1	0.971				1	0	0	3	1	2	0.988
	0	1	1	3	1	2	0.056				0	1	0	3	3	1	0.358				0	0	2	3	2	1	0.013				-2	-2	2	3	2	2	0.01
	-2	-2	5	3	1	2	0.005				0	1	0	3	1	3	0.005				0	1	0	3	2	1	0.01				1	0	0	3	3	0	0.001
4268.62	0	0	2	3	2	2	0.497	0.497		2934.51	1	0	0	3	1	3	0.963	0.964		2930.78	1	0	0	3	0	3	0.967	0.967		3107.22	1	0	0	3	3	0	0.99	0.992
	0	0	2	3	2	2	0.497				1	0	0	3	1	3	0.963				1	0	0	3	0	3	0.967				1	0	0	3	3	0	0.99
	0	1	1	3	1	2	0.368				-2	-2	2	3	0	3	0.031				-2	-2	2	3	1	3	0.03				-2	-2	2	3	2	2	0.006
	0	2	0	3	2	2	0.04				1	0	0	3	3	1	0.002				-2	-2	9	3	1	3	0.001				1	0	0	3	1	2	0.002
4358.3	0	1	1	3	1	2	0.542	0.616		3106.57	1	0	0	3	3	1	0.99	0.991		3028.47	1	0	0	3	2	1	0.993	0.993		4056.8	0	2	0	3	1	2	0.966	0.966
	0	1	1	3	1	2	0.542				1	0	0	3	3	1	0.99				1	0	0	3	2	1	0.993				0	2	0	3	1	2	0.966
	0	0	2	3	2	2	0.322				-2	-2	2	3	2	1	0.007				-2	-2	2	3	1	3	0.003				0	1	1	3	2	2	0.021
	0	1	1	3	3	0	0.074				1	0	0	3	1	3	0.001				-2	-2	2	3	3	1	0.003				-2	-2	5	3	2	2	0.004
4452.8	0	1	1	3	3	0	0.877	0.881		3995.57	0	2	0	3	1	3	0.854	0.857		3989.82	0	2	0	3	0	3	0.871	0.873		4219.18	0	2	0	3	3	0	0.844	0.849
	0	1	1	3	3	0	0.877				0	2	0	3	1	3	0.854				0	2	0	3	0	3	0.871				0	2	0	3	3	0	0.844
	0	0	2	3	2	2	0.088				0	1	1	3	0	3	0.096				0	1	1	3	1	3	0.084				0	1	1	3	2	2	0.107
	-2	-2	7	3	2	2	0.014				0	0	2	3	1	3	0.016				0	0	2	3	0	3	0.015				0	0	2	3	1	2	0.032
4889.22	-2	-2	2	3	1	2	0.477	0.493		4160.04	0	0	2	3	1	3	0.491	0.491		4112.27	0	2	0	3	2	1	0.909	0.913		4266.39	0	0	2	3	1	2	0.587	0.618
	-2	-2	2	3	1	2	0.477				0	0	2	3	1	3	0.491				0	2	0	3	2	1	0.909				0	0	2	3	1	2	0.587
	-2	-2	1	3	2	2	0.476				0	1	1	3	0	3	0.263				0	1	1	3	1	3	0.051				0	1	1	3	2	2	0.199
	-2	-2	2	3	3	0	0.017				0	2	0	3	1	3	0.07				0	0	2	3	0	3	0.018				0	2	0	3	3	0	0.108
4968.86	-2	-2	1	3	2	2	0.488	0.488		4222.47	0	2	0	3	3	1	0.918	0.922		4162.8	0	0	2	3	0	3	0.482	0.491		4383.94	0	0	2	3	1	2	0.311	0.512
	-2	-2	1	3	2	2	0.488				0	2	0	3	3	1	0.918				0	0	2	3	0	3	0.482				0	1	1	3	2	2	0.433
	-2	-2	2	3	1	2	0.479				0	1	1	3	2	1	0.052				0	1	1	3	1	3	0.233				0	0	2	3	1	2	0.311
	-2	-2	8	3	1	2	0.008				0	0	2	3	1	3	0.011				0	2	0	3	2	1	0.067				0	0	2	3	3	0	0.201
5038.87	-2	-2	2	3	3	0	0.957	0.961		4325.03	0	1	1	3	0	3	0.453	0.68		4331.36	0	0	2	3	2	1	0.838	0.866		4416.13	0	0	2	3	3	0	0.736	0.744
	-2	-2	2	3	3	0	0.957				0	1	1	3	0	3	0.453				0	0	2	3	2	1	0.838				0	0	2	3	3	0	0.736
	-2	-2	1	3	2	2	0.02				0	1	1	3	2	1	0.227				0	1	1	3	3	1	0.108				0	1	1	3	2	2	0.196
	1	0	2	3	2	2	0.008				0	0	2	3	1	3	0.182				0	0	2	3	0	3	0.028				0	2	0	3	3	0	0.017
5659.27	-2	-2	3	3	2	2	0.98	0.98		4364.91	0	1	1	3	2	1	0.481	0.579		4341.04	0	1	1	3	1	3	0.534	0.548		4875.58	-2	-2	1	3	1	2	0.805	0.81
	-2	-2	3	3	2	2	0.98				0	1	1	3	2	1	0.481				0	1	1	3	1	3	0.534				-2	-2	1	3	1	2	0.805
	-2	-2	9	3	1	2	0.014				0	0	2	3	3	1	0.206				0	0	2	3	0	3	0.286				-2	-2	2	3	2	2	0.172
	-2	-2	9	3	3	0	0.003				0	0	2	3	1	3	0.112				-2	-2	7	3	0	3	0.038				-2	-2	8	3	2	2	0.006
5865.94	-2	-2	4	3	2	2	0.937	0.937		4417.59	0	0	2	3	3	1	0.736	0.74		4454.34	0	1	1	3	3	1	0.858	0.863		4956.63	-2	-2	2	3	2	2	0.687	0.687
	-2	-2	4	3	2	2	0.937				0	0	2	3	3	1	0.736				0	1	1	3	3	1	0.858				-2	-2	2	3	2	2	0.687
	-2	-2	5	3	1	2	0.03				0	1	1	3	2	1	0.207				0	0	2	3	2	1	0.111				-2	-2	1	3	1	2	0.183
	-2	-2	6	3	1	2	0.016				0	2	0	3	3	1	0.017				-2	-2	7	3	2	1	0.012				-2	-2	1	3	3	0	0.085
6102.2	-2	-2	5	3	1	2	0.878	0.886		4791.39	-2	-2	1	3	1	3	0.539	0.539		4790.32	-2	-2	1	3	0	3	0.564	0.566		5042.81	-2	-2	1	3	3	0	0.9	0.903
	-2	-2	5	3	1	2	0.878				-2	-2	1	3	1	3	0.539				-2	-2	1	3	0	3	0.564				-2	-2	1	3	3	0	0.9
	-2	-2	4	3	2	2	0.032				-2	-2	2	3	0	3	0.389				-2	-2	2	3	1	3	0.369				-2	-2	2	3	2	2	0.082
	0	0	2	3	2	2	0.027				1	0	2	3	1	3	0.018				1	0	2	3	0	3	0.016				-2	-2	8	3	2	2	0.007
6184	-2	-2	6	3	1	2	0.454	0.48		4915.79	-2	-2	2	3	0	3	0.488	0.488		4903.49	-2	-2	1	3	0	3	0.339	0.553		5630.41	-2	-2	3	3	1	2	0.985	0.987
	-2	-2	6	3	1	2	0.454				-2	-2	2	3	0	3	0.488				-2	-2	2	3	1	3	0.38				-2	-2	3	3	1	2	0.985
	-2	-2	7	3	2	2	0.401				-2	-2	1	3	1	3	0.424				-2	-2	1	3	0	3	0.339				-2	-2	9	3	2	2	0.01
	-2	-2	5	3	3	0	0.044				1	0	2	3	1	3	0.027				-2	-2	1	3	2	1	0.215				-2	-2	3	3	3	0	0.002
6203.95	-2	-2	5	3	3	0	0.871	0.891		4961.01	-2	-2	2	3	2	1	0.855	0.864		4946.92	-2	-2	1	3	2	1	0.744	0.813		5747.41	-2	-2	3	3	3	0	0.987	0.99
	-2	-2	5	3	3	0	0.871				-2	-2	2	3	2	1	0.855				-2	-2	1	3	2	1	0.744				-2	-2	3	3	3	0	0.987
	-2	-2	6	3	1	2	0.056				-2	-2	1	3	3	1	0.116				-2	-2	2	3	1	3	0.128				-2	-2	9	3	2	2	0.007
	-2	-2	5	3	1	2	0.02				-2	-2	2	3	0	3	0.009				-2	-2	1	3	0	3	0.068				-2	-2	3	3	1	2	0.003
6335.29	-2	-2	6	3	1	2	0.381	0.67		5044.23	-2	-2	1	3	3	1	0.868	0.873		5038.53	-2	-2	2	3	3	1	0.945	0.946		5808.74	-2	-2	4	3	1	2	0.973	0.974
	-2	-2	6	3	1	2	0.381				-2	-2	1	3	3	1	0.868				-2	-2	2	3	3	1	0.945				-2	-2	4	3	1	2	0.973
	-2	-2	6	3	3	0	0.289				-2	-2	2	3	2	1	0.114				-2	-2	1	3	2	1	0.033				-2	-2	5	3	2	2	0.01
	-2	-2	7	3	2	2	0.281				-2	-2	8	3	2	1	0.006				1	0	2	3	2	1	0.01				-2	-2	6	3	2	2	0.007
6408.84	-2	-2	6	3	3	0	0.64	0.68		5579.85	-2	-2	3	3	1	3	0.958	0.96		5576.47	-2	-2	3	3	0	3	0.962	0.962		6004.13	-2	-2	4	3	3	0	0.913	0.913
	-2	-2	6	3	3	0	0.64				-2	-2	3	3	1	3	0.958				-2	-2	3	3	0	3	0.962				-2	-2	4	3	3	0	0.913
	-2	-2	7	3	2	2	0.236				-2	-2	9	3	0	3	0.033				-2	-2	9	3	1	3	0.032				-2	-2	5	3	2	2	0.057
	-2	-2	6	3	1	2	0.04				-2	-2	2	3	0	3	0.002				-2	-2	2	3	1	3	0.002				-2	-2	6	3	2	2	0.014
6714.12	1	2	0	3	2	2	0.891	0.891		5746.72	-2	-2	3	3	3	1	0.988	0.989		5672.3	-2	-2	3	3	2	1	0.991	0.991		6121.75	-2	-2	5	3	2	2	0.812	0.812
	1	2	0	3	2	2	0.891				-2	-2	3	3	3	1	0.988				-2	-2	3	3	2	1	0.991				-2	-2	5	3	2	2	0.812
	-2	-2	8	3	1	2	0.045				-2	-2	9	3	2	1	0.007				-2	-2	9	3	1	3	0.003				-2	-2	4	3	3	0	0.061
	1	0	2	3	2	2	0.022				1	0	0	3	3	1	0.001				-2	-2	9	3	3	1	0.003				0	0	2	3	1	2	0.018
6744.38	1	0	2	3	2	2	0.701	0.701		5751.4	-2	-2	4	3	1	3	0.889	0.893		5742.2	-2	-2	4	3	0	3	0.9	0.908		6187.83	-2	-2	7	3	1	2	0.454	0.495
	1	0	2	3	2	2	0.701				-2	-2	4	3	1	3	0.889				-2	-2	4	3	0	3	0.9				-2	-2	7	3	1	2	0.454
	-2	-2	8	3	1	2	0.152				-2	-2	5	3	0	3	0.044				-2	-2	5	3	1	3	0.036				-2	-2	6	3	2	2	0.417
	1	2	0	3	2	2	0.034				-2	-2	6	3	0	3	0.033				-2	-2	6	3	1	3	0.028				-2	-2	7	3	3	0	0.041
6895.05	-2	-2	8	3	1	2	0.769	0.784		6002.2	-2	-2	4	3	3	1	0.844	0.845		5875.83	-2	-2	4	3	2	1	0.956	0.957		6340.26	-2	-2	7	3	1	2	0.453	0.653
	-2	-2	8	3	1	2	0.769				-2	-2	4	3	3	1	0.844				-2	-2	4	3	2	1	0.956				-2	-2	7	3	1	2	0.453
	1	0	2	3	2	2	0.16				-2	-2	5	3	0	3	0.059				-2	-2	5	3	1	3	0.02				-2	-2	6	3	2	2	0.289
	1	2	0	3	2	2	0.021				-2	-2	5	3	2	1	0.047				-2	-2	6	3	1	3	0.009				-2	-2	7	3	3	0	0.2
6995.73	-2	-2	8	3	3	0	0.94	0.94		6029.95	-2	-2	5	3	0	3	0.638	0.638		6029.73	-2	-2	5	3	1	3	0.688	0.688		6408.03	-2	-2	7	3	3	0	0.726	0.751
	-2	-2	8	3	3	0	0.94				-2	-2	5	3	0	3	0.638				-2	-2	5	3	1	3	0.688				-2	-2	7	3	3	0	0.726
	1	0	2	3	2	2	0.036				0	0	2	3	1	3	0.071				0	0	2	3	0	3	0.069				-2	-2	6	3	2	2	0.191
	-2	-2	1	3	2	2	0.002				-2	-2	4	3	3	1	0.063				-2	-2	4	3	0	3	0.027				-2	-2	7	3	1	2	0.025
7422.41	-2	-2	9	3	1	2	0.786	0.805		6060.33	-2	-2	7	3	1	3	0.398	0.398		6059.82	-2	-2	7	3	0	3	0.406	0.415		6675.16	1	2	0	3	1	2	0.877	0.877
	-2	-2	9	3	1	2	0.786				-2	-2	7	3	1	3	0.398				-2	-2	7	3	0	3	0.406				1	2	0	3	1	2	0.877
	-2	-2	11	3	2	2	0.126				-2	-2	6	3	0	3	0.368				-2	-2	6	3	1	3	0.375				1	0	2	3	1	2	0.082
	-2	-2	10	3	2	2	0.019				-2	-2	4	3	1	3	0.045				-2	-2	4	3	0	3	0.038				-2	-2	8	3	2	2	0.019
7525.99	-2	-2	11	3	2	2	0.494	0.494		6143.59	-2	-2	5	3	2	1	0.888	0.907		6200.78	-2	-2	5	3	3	1	0.918	0.919		6731.28	1	0	2	3	1	2	0.701	0.726
	-2	-2	11	3	2	2	0.494				-2	-2	5	3	2	1	0.888				-2	-2	5	3	3	1	0.918				1	0	2	3	1	2	0.701
	-2	-2	9	3	3	0	0.233				-2	-2	4	3	3	1	0.042				-2	-2	7	3	2	1	0.033				-2	-2	8	3	2	2	0.113
	-2	-2	9	3	1	2	0.163				-2	-2	5	3	0	3	0.02				0	0	2	3	2	1	0.006				1	2	0	3	1	2	0.076
7536.05	-2	-2	10	3	2	2	0.818	0.818		6275.18	-2	-2	6	3	2	1	0.716	0.801		6285.63	-2	-2	7	3	2	1	0.669	0.753		6813.4	1	2	0	3	3	0	0.886	0.891
	-2	-2	10	3	2	2	0.818				-2	-2	6	3	2	1	0.716				-2	-2	7	3	2	1	0.669				1	2	0	3	3	0	0.886
	-2	-2	11	3	2	2	0.136				-2	-2	7	3	3	1	0.144				-2	-2	6	3	3	1	0.183				1	0	2	3	3	0	0.053
	-2	-2	9	3	3	0	0.001				-2	-2	6	3	0	3	0.086				-2	-2	7	3	0	3	0.084				-2	-2	8	3	2	2	0.029
7549.58	-2	-2	9	3	3	0	0.72	0.723		6333.28	-2	-2	7	3	1	3	0.382	0.446		6329.78	-2	-2	6	3	1	3	0.366	0.461		6864.88	1	0	2	3	3	0	0.673	0.777
	-2	-2	9	3	3	0	0.72				-2	-2	7	3	1	3	0.382				-2	-2	6	3	1	3	0.366				1	0	2	3	3	0	0.673
	-2	-2	11	3	2	2	0.223				-2	-2	6	3	0	3	0.323				-2	-2	7	3	0	3	0.341				-2	-2	8	3	2	2	0.183
	-2	-2	10	3	2	2	0.027				-2	-2	7	3	3	1	0.065				-2	-2	6	3	3	1	0.094				1	0	2	3	1	2	0.103
										6408.77	-2	-2	7	3	3	1	0.758	0.768		6408.79	-2	-2	6	3	3	1	0.687	0.703		6939.87	-2	-2	8	3	2	2	0.606	0.606
											-2	-2	7	3	3	1	0.758				-2	-2	6	3	3	1	0.687				-2	-2	8	3	2	2	0.606
											-2	-2	6	3	2	1	0.184				-2	-2	7	3	2	1	0.225				1	0	2	3	3	0	0.219
											-2	-2	7	3	1	3	0.01				-2	-2	5	3	3	1	0.024				1	2	0	3	3	0	0.069
										6612.49	1	2	0	3	1	3	0.443	0.444		6607.94	1	2	0	3	0	3	0.509	0.51		7432.35	-2	-2	9	3	2	2	0.621	0.621
											1	2	0	3	1	3	0.443				1	2	0	3	0	3	0.509				-2	-2	9	3	2	2	0.621
											1	0	2	3	1	3	0.327				1	0	2	3	0	3	0.295				-2	-2	11	3	1	2	0.267
											-2	-2	8	3	0	3	0.181				-2	-2	8	3	1	3	0.154				-2	-2	10	3	1	2	0.047
										6636.01	1	2	0	3	1	3	0.42	0.42		6634.61	1	2	0	3	0	3	0.363	0.363		7460.84	-2	-2	10	3	1	2	0.854	0.855
											1	2	0	3	1	3	0.42				1	2	0	3	0	3	0.363				-2	-2	10	3	1	2	0.854
											1	0	2	3	1	3	0.299				1	0	2	3	0	3	0.33				-2	-2	11	3	1	2	0.124
											-2	-2	8	3	0	3	0.058				-2	-2	8	3	1	3	0.081				-2	-2	10	3	3	0	0.001
										6811.94	1	2	0	3	3	1	0.871	0.871		6726.87	1	2	0	3	2	1	0.934	0.935		7498.38	-2	-2	11	3	1	2	0.596	0.608
											1	2	0	3	3	1	0.871				1	2	0	3	2	1	0.934				-2	-2	11	3	1	2	0.596
											1	0	2	3	3	1	0.074				-2	-2	8	3	1	3	0.021				-2	-2	9	3	2	2	0.282
											-2	-2	8	3	0	3	0.011				1	0	2	3	2	1	0.019				-2	-2	10	3	1	2	0.078
										6855.04	1	0	2	3	3	1	0.541	0.546		6791.31	1	0	2	3	2	1	0.862	0.901		7620.83	-2	-2	11	3	3	0	0.835	0.835
											1	0	2	3	3	1	0.541				1	0	2	3	2	1	0.862				-2	-2	11	3	3	0	0.835
											-2	-2	8	3	2	1	0.332				1	0	2	3	0	3	0.039				-2	-2	10	3	3	0	0.126
											-2	-2	8	3	0	3	0.056				-2	-2	8	3	3	1	0.035				-2	-2	9	3	2	2	0.024
										6863.99	-2	-2	8	3	0	3	0.59	0.59		6871.68	-2	-2	8	3	1	3	0.628	0.641		7698.35	-2	-2	10	3	3	0	0.823	0.823
											-2	-2	8	3	0	3	0.59				-2	-2	8	3	1	3	0.628				-2	-2	10	3	3	0	0.823
											1	0	2	3	1	3	0.189				1	0	2	3	0	3	0.184				-2	-2	11	3	3	0	0.125
											1	0	2	3	3	1	0.105				1	0	2	3	2	1	0.028				-2	-2	4	3	3	0	0.003
										6940.95	-2	-2	8	3	2	1	0.629	0.636		6996.2	-2	-2	8	3	3	1	0.931	0.935
											-2	-2	8	3	2	1	0.629				-2	-2	8	3	3	1	0.931
											1	0	2	3	3	1	0.249				1	0	2	3	2	1	0.042
											1	2	0	3	3	1	0.065				-2	-2	8	3	1	3	0.003
										7333.78	-2	-2	9	3	0	3	0.628	0.636		7334.27	-2	-2	9	3	1	3	0.624	0.624
											-2	-2	9	3	0	3	0.628				-2	-2	9	3	1	3	0.624
											-2	-2	11	3	1	3	0.217				-2	-2	11	3	0	3	0.224
											-2	-2	10	3	1	3	0.034				-2	-2	10	3	0	3	0.036
										7409.11	-2	-2	10	3	1	3	0.795	0.801		7394.36	-2	-2	10	3	0	3	0.795	0.814
											-2	-2	10	3	1	3	0.795				-2	-2	10	3	0	3	0.795
											-2	-2	11	3	1	3	0.119				-2	-2	11	3	0	3	0.119
											-2	-2	10	3	3	1	0.006				-2	-2	10	3	2	1	0.019
										7467.42	-2	-2	11	3	1	3	0.573	0.574		7459.69	-2	-2	11	3	0	3	0.597	0.639
											-2	-2	11	3	1	3	0.573				-2	-2	11	3	0	3	0.597
											-2	-2	9	3	0	3	0.235				-2	-2	9	3	1	3	0.204
											-2	-2	10	3	1	3	0.085				-2	-2	10	3	0	3	0.086
										7476.31	-2	-2	9	3	2	1	0.881	0.881		7518.25	-2	-2	11	3	2	1	0.535	0.552
											-2	-2	9	3	2	1	0.881				-2	-2	11	3	2	1	0.535
											-2	-2	11	3	1	3	0.043				-2	-2	9	3	3	1	0.315
											-2	-2	11	3	3	1	0.032				-2	-2	10	3	2	1	0.09
										7621.2	-2	-2	11	3	3	1	0.826	0.829		7543.12	-2	-2	10	3	2	1	0.836	0.847
											-2	-2	11	3	3	1	0.826				-2	-2	10	3	2	1	0.836
											-2	-2	10	3	3	1	0.125				-2	-2	11	3	2	1	0.118
											-2	-2	9	3	2	1	0.031				-2	-2	10	3	0	3	0.011
										7697.81	-2	-2	10	3	3	1	0.812	0.814		7551.87	-2	-2	9	3	3	1	0.655	0.658
											-2	-2	10	3	3	1	0.812				-2	-2	9	3	3	1	0.655
											-2	-2	11	3	3	1	0.124				-2	-2	11	3	2	1	0.289
											-2	-2	4	3	3	1	0.003				-2	-2	10	3	2	1	0.027

## Sheet: J=4
A1 symmetry										A2 symmetry										B1 symmetry										B2 symmetry
Erovib	n1	n2	n3	J	Ka	Kc	RRD^2	FullVib		Erovib	n1	n2	n3	J	Ka	Kc	RRD^2	FullVib		Erovib	n1	n2	n3	J	Ka	Kc	RRD^2	FullVib		Erovib	n1	n2	n3	J	Ka	Kc	RRD^2	FullVib
315.73	0	0	0	4	0	4	0.943	0.943		399.06	0	0	0	4	1	3	0.965	0.976		419.47	0	0	0	4	2	3	0.968	0.968		317.23	0	0	0	4	1	4	0.928	0.942
	0	0	0	4	0	4	0.943				0	0	0	4	1	3	0.965				0	0	0	4	2	3	0.968				0	0	0	4	1	4	0.928
	0	0	1	4	1	4	0.053				0	0	1	4	2	3	0.022				0	0	1	4	1	3	0.024				0	0	1	4	0	4	0.054
	0	0	2	4	0	4	0.001				0	0	0	4	3	1	0.011				0	0	1	4	3	1	0.006				0	0	0	4	3	2	0.014
450.77	0	0	0	4	2	2	0.989	0.989		523.41	0	0	0	4	3	1	0.97	0.985		643.35	0	0	0	4	4	1	0.987	0.987		519.37	0	0	0	4	3	2	0.968	0.98
	0	0	0	4	2	2	0.989				0	0	0	4	3	1	0.97				0	0	0	4	4	1	0.987				0	0	0	4	3	2	0.968
	0	0	1	4	3	2	0.006				0	0	0	4	1	3	0.015				0	0	1	4	3	1	0.01				0	0	1	4	2	2	0.015
	0	0	1	4	1	4	0.003				0	0	1	4	2	3	0.01				1	0	0	4	4	1	0.002				0	0	0	4	1	4	0.012
643.46	0	0	0	4	4	0	0.987	0.987		2339.92	0	1	0	4	1	3	0.853	0.867		2357.04	0	1	0	4	2	3	0.776	0.776		2234.35	0	1	0	4	1	4	0.693	0.703
	0	0	0	4	4	0	0.987				0	1	0	4	1	3	0.853				0	1	0	4	2	3	0.776				0	1	0	4	1	4	0.693
	0	0	1	4	3	2	0.01				0	0	1	4	2	3	0.104				0	0	1	4	1	3	0.167				0	0	1	4	0	4	0.219
	1	0	0	4	4	0	0.002				0	1	1	4	2	3	0.015				0	0	1	4	3	1	0.019				0	1	1	4	0	4	0.03
2233.36	0	1	0	4	0	4	0.711	0.711		2465.16	0	1	0	4	3	1	0.521	0.622		2508.57	0	0	1	4	1	3	0.71	0.728		2425.56	0	0	1	4	0	4	0.548	0.563
	0	1	0	4	0	4	0.711				0	1	0	4	3	1	0.521				0	0	1	4	1	3	0.71				0	0	1	4	0	4	0.548
	0	0	1	4	1	4	0.211				0	0	1	4	2	3	0.328				0	1	0	4	2	3	0.19				0	1	0	4	1	4	0.203
	0	1	1	4	1	4	0.03				0	1	0	4	1	3	0.101				0	0	2	4	2	3	0.04				0	1	0	4	3	2	0.086
2394.52	0	1	0	4	2	2	0.71	0.78		2541.26	0	1	0	4	3	1	0.442	0.468		2578.77	0	0	1	4	3	1	0.674	0.727		2471.94	0	1	0	4	3	2	0.608	0.65
	0	1	0	4	2	2	0.71				0	0	1	4	2	3	0.464				0	0	1	4	3	1	0.674				0	1	0	4	3	2	0.608
	0	0	1	4	1	4	0.163				0	1	0	4	3	1	0.442				0	1	0	4	4	1	0.241				0	0	1	4	2	2	0.262
	0	1	0	4	0	4	0.071				0	1	0	4	1	3	0.026				0	0	1	4	1	3	0.053				0	0	1	4	0	4	0.057
2439.8	0	0	1	4	1	4	0.435	0.459		2703.32	0	0	1	4	4	1	0.964	0.965		2657.25	0	1	0	4	4	1	0.74	0.743		2563.74	0	0	1	4	2	2	0.682	0.683
	0	0	1	4	1	4	0.435				0	0	1	4	4	1	0.964				0	1	0	4	4	1	0.74				0	0	1	4	2	2	0.682
	0	1	0	4	2	2	0.253				0	0	2	4	3	1	0.02				0	0	1	4	3	1	0.231				0	1	0	4	3	2	0.273
	0	1	0	4	0	4	0.169				0	1	0	4	3	1	0.007				0	1	1	4	3	1	0.008				0	0	0	4	3	2	0.01
2574.22	0	0	1	4	3	2	0.703	0.706		3131.02	1	0	0	4	1	3	0.962	0.974		3150.52	1	0	0	4	2	3	0.965	0.965		2703.49	0	0	1	4	4	0	0.965	0.967
	0	0	1	4	3	2	0.703				1	0	0	4	1	3	0.962				1	0	0	4	2	3	0.965				0	0	1	4	4	0	0.965
	0	1	0	4	4	0	0.226				-2	-2	2	4	2	3	0.023				-2	-2	2	4	1	3	0.025				0	0	2	4	3	2	0.019
	0	0	2	4	2	2	0.023				1	0	0	4	3	1	0.012				-2	-2	2	4	3	1	0.006				0	1	0	4	3	2	0.006
2656.19	0	1	0	4	4	0	0.76	0.766		3251.64	1	0	0	4	3	1	0.966	0.982		3367.14	1	0	0	4	4	1	0.983	0.983		3050.47	1	0	0	4	1	4	0.924	0.938
	0	1	0	4	4	0	0.76				1	0	0	4	3	1	0.966				1	0	0	4	4	1	0.983				1	0	0	4	1	4	0.924
	0	0	1	4	3	2	0.208				1	0	0	4	1	3	0.016				-2	-2	2	4	3	1	0.011				-2	-2	2	4	0	4	0.055
	0	1	1	4	3	2	0.009				-2	-2	2	4	2	3	0.011				-2	-2	3	4	4	1	0.003				1	0	0	4	3	2	0.014
3049.05	1	0	0	4	0	4	0.939	0.939		4189.6	0	2	0	4	1	3	0.912	0.915		4218.55	0	2	0	4	2	3	0.855	0.856		3247.56	1	0	0	4	3	2	0.965	0.977
	1	0	0	4	0	4	0.939				0	2	0	4	1	3	0.912				0	2	0	4	2	3	0.855				1	0	0	4	3	2	0.965
	-2	-2	2	4	1	4	0.054				0	1	1	4	2	3	0.051				0	1	1	4	1	3	0.091				-2	-2	2	4	2	2	0.015
	-2	-2	9	4	1	4	0.002				0	0	2	4	1	3	0.012				0	0	2	4	2	3	0.016				1	0	0	4	1	4	0.012
3181.57	1	0	0	4	2	2	0.987	0.987		4339.5	0	2	0	4	3	1	0.67	0.705		4384.65	0	0	2	4	2	3	0.472	0.473		4090.55	0	2	0	4	1	4	0.739	0.754
	1	0	0	4	2	2	0.987				0	2	0	4	3	1	0.67				0	0	2	4	2	3	0.472				0	2	0	4	1	4	0.739
	-2	-2	2	4	3	2	0.006				0	1	1	4	2	3	0.179				0	1	1	4	1	3	0.24				0	1	1	4	0	4	0.152
	-2	-2	2	4	1	4	0.004				0	0	2	4	1	3	0.065				0	2	0	4	2	3	0.076				0	0	2	4	1	4	0.037
3367.26	1	0	0	4	4	0	0.983	0.983		4393.12	0	0	2	4	1	3	0.407	0.46		4500.69	0	2	0	4	4	1	0.708	0.712		4250.53	0	0	2	4	1	4	0.402	0.403
	1	0	0	4	4	0	0.983				0	0	2	4	1	3	0.407				0	2	0	4	4	1	0.708				0	0	2	4	1	4	0.402
	-2	-2	2	4	3	2	0.01				0	2	0	4	3	1	0.252				0	1	1	4	3	1	0.175				0	1	1	4	0	4	0.195
	-2	-2	3	4	4	0	0.003				0	1	1	4	2	3	0.141				0	1	1	4	1	3	0.094				0	2	0	4	1	4	0.121
4088.33	0	2	0	4	0	4	0.763	0.764		4548.82	0	0	2	4	3	1	0.538	0.835		4521.52	0	1	1	4	1	3	0.505	0.535		4346.17	0	2	0	4	3	2	0.849	0.869
	0	2	0	4	0	4	0.763				0	0	2	4	3	1	0.538				0	1	1	4	1	3	0.505				0	2	0	4	3	2	0.849
	0	1	1	4	1	4	0.143				0	0	2	4	1	3	0.298				0	0	2	4	2	3	0.218				0	1	1	4	2	2	0.085
	0	0	2	4	0	4	0.037				0	1	1	4	2	3	0.067				0	2	0	4	4	1	0.123				0	2	0	4	1	4	0.02
4238.88	0	2	0	4	2	2	0.421	0.492		4562.62	0	1	1	4	2	3	0.471	0.51		4614.02	0	1	1	4	3	1	0.528	0.536		4469.17	0	1	1	4	0	4	0.367	0.589
	0	2	0	4	2	2	0.421				0	1	1	4	2	3	0.471				0	1	1	4	3	1	0.528				0	1	1	4	0	4	0.367
	0	0	2	4	0	4	0.203				0	0	2	4	3	1	0.218				0	0	2	4	4	1	0.179				0	1	1	4	2	2	0.217
	0	1	1	4	1	4	0.159				0	0	2	4	1	3	0.102				0	0	2	4	2	3	0.116				0	0	2	4	1	4	0.147
4266.18	0	2	0	4	2	2	0.539	0.596		4721.03	0	1	1	4	4	1	0.882	0.883		4669.56	0	0	2	4	4	1	0.757	0.758		4507.16	0	0	2	4	3	2	0.344	0.425
	0	2	0	4	2	2	0.539				0	1	1	4	4	1	0.882				0	0	2	4	4	1	0.757				0	0	2	4	3	2	0.344
	0	0	2	4	0	4	0.21				0	0	2	4	3	1	0.078				0	1	1	4	3	1	0.147				0	1	1	4	2	2	0.239
	-2	-2	5	4	1	4	0.064				-2	-2	7	4	3	1	0.02				0	2	0	4	4	1	0.045				0	1	1	4	0	4	0.129
4466.87	0	0	2	4	2	2	0.454	0.464		5001.09	-2	-2	1	4	1	3	0.656	0.679		5008.41	-2	-2	1	4	2	3	0.524	0.524		4569.31	0	1	1	4	2	2	0.412	0.483
	0	0	2	4	2	2	0.454				-2	-2	1	4	1	3	0.656				-2	-2	1	4	2	3	0.524				0	1	1	4	2	2	0.412
	0	1	1	4	3	2	0.3				-2	-2	2	4	2	3	0.27				-2	-2	2	4	1	3	0.377				0	0	2	4	3	2	0.408
	0	2	0	4	4	0	0.098				-2	-2	1	4	3	1	0.023				-2	-2	2	4	3	1	0.037				0	1	1	4	4	0	0.069
4486.9	0	1	1	4	1	4	0.409	0.413		5098.92	-2	-2	2	4	2	3	0.469	0.472		5125.65	-2	-2	2	4	1	3	0.498	0.5		4720.65	0	1	1	4	4	0	0.885	0.887
	0	1	1	4	1	4	0.409				-2	-2	2	4	2	3	0.469				-2	-2	2	4	1	3	0.498				0	1	1	4	4	0	0.885
	0	0	2	4	0	4	0.233				-2	-2	1	4	1	3	0.317				-2	-2	1	4	2	3	0.431				0	0	2	4	3	2	0.073
	0	2	0	4	4	0	0.083				-2	-2	1	4	3	1	0.137				1	0	2	4	2	3	0.02				-2	-2	7	4	3	2	0.02
4512.45	0	2	0	4	4	0	0.676	0.679		5186.48	-2	-2	1	4	3	1	0.799	0.806		5182.03	-2	-2	2	4	3	1	0.833	0.879		4884.33	-2	-2	1	4	1	4	0.493	0.498
	0	2	0	4	4	0	0.676				-2	-2	1	4	3	1	0.799				-2	-2	2	4	3	1	0.833				-2	-2	1	4	1	4	0.493
	0	0	2	4	2	2	0.232				-2	-2	2	4	2	3	0.141				-2	-2	1	4	4	1	0.062				-2	-2	2	4	0	4	0.382
	-2	-2	5	4	3	2	0.019				-2	-2	2	4	4	1	0.015				-2	-2	2	4	1	3	0.047				1	0	2	4	1	4	0.031
4621.29	0	1	1	4	3	2	0.481	0.493		5290.94	-2	-2	2	4	4	1	0.945	0.946		5315.37	-2	-2	1	4	4	1	0.917	0.918		5047.38	-2	-2	1	4	1	4	0.419	0.458
	0	1	1	4	3	2	0.481				-2	-2	2	4	4	1	0.945				-2	-2	1	4	4	1	0.917				-2	-2	1	4	1	4	0.419
	0	0	2	4	2	2	0.197				-2	-2	1	4	3	1	0.02				-2	-2	2	4	3	1	0.059				-2	-2	2	4	0	4	0.395
	0	0	2	4	4	0	0.182				1	0	2	4	3	1	0.015				-2	-2	8	4	3	1	0.01				1	0	2	4	1	4	0.046
4669.3	0	0	2	4	4	0	0.753	0.756		5774.47	-2	-2	3	4	1	3	0.955	0.97		5792.45	-2	-2	3	4	2	3	0.959	0.959		5105.07	-2	-2	2	4	2	2	0.666	0.694
	0	0	2	4	4	0	0.753				-2	-2	3	4	1	3	0.955				-2	-2	3	4	2	3	0.959				-2	-2	2	4	2	2	0.666
	0	1	1	4	3	2	0.144				-2	-2	9	4	2	3	0.024				-2	-2	9	4	1	3	0.026				-2	-2	1	4	3	2	0.257
	0	2	0	4	4	0	0.045				-2	-2	3	4	3	1	0.015				-2	-2	9	4	3	1	0.007				-2	-2	2	4	0	4	0.023
4883.96	-2	-2	1	4	0	4	0.505	0.505		5890.75	-2	-2	3	4	3	1	0.959	0.979		5979.09	-2	-2	4	4	2	3	0.891	0.892		5194.78	-2	-2	1	4	3	2	0.661	0.681
	-2	-2	1	4	0	4	0.505				-2	-2	3	4	3	1	0.959				-2	-2	4	4	2	3	0.891				-2	-2	1	4	3	2	0.661
	-2	-2	2	4	1	4	0.374				-2	-2	3	4	1	3	0.02				-2	-2	5	4	1	3	0.041				-2	-2	2	4	2	2	0.277
	1	0	2	4	0	4	0.03				-2	-2	9	4	2	3	0.011				-2	-2	6	4	1	3	0.031				-2	-2	1	4	1	4	0.02
5038.6	-2	-2	1	4	0	4	0.378	0.545		5937	-2	-2	4	4	1	3	0.939	0.94		6001.05	-2	-2	3	4	4	1	0.979	0.979		5291.03	-2	-2	2	4	4	0	0.948	0.949
	-2	-2	1	4	0	4	0.378				-2	-2	4	4	1	3	0.939				-2	-2	3	4	4	1	0.979				-2	-2	2	4	4	0	0.948
	-2	-2	2	4	1	4	0.337				-2	-2	5	4	2	3	0.02				-2	-2	9	4	3	1	0.011				-2	-2	1	4	3	2	0.018
	-2	-2	1	4	2	2	0.166				-2	-2	6	4	2	3	0.017				1	0	0	4	4	1	0.003				1	0	2	4	3	2	0.014
5086.2	-2	-2	1	4	2	2	0.742	0.806		6120.27	-2	-2	4	4	3	1	0.857	0.864		6249.85	-2	-2	5	4	1	3	0.651	0.726		5694.11	-2	-2	3	4	1	4	0.917	0.93
	-2	-2	1	4	2	2	0.742				-2	-2	4	4	3	1	0.857				-2	-2	5	4	1	3	0.651				-2	-2	3	4	1	4	0.917
	-2	-2	2	4	3	2	0.079				-2	-2	5	4	2	3	0.071				-2	-2	5	4	3	1	0.075				-2	-2	9	4	0	4	0.058
	-2	-2	2	4	1	4	0.072				-2	-2	6	4	2	3	0.03				0	0	2	4	2	3	0.054				-2	-2	3	4	3	2	0.013
5179.12	-2	-2	2	4	3	2	0.794	0.799		6262.08	-2	-2	5	4	2	3	0.651	0.651		6277.15	-2	-2	6	4	1	3	0.266	0.345		5844.36	-2	-2	4	4	1	4	0.803	0.825
	-2	-2	2	4	3	2	0.794				-2	-2	5	4	2	3	0.651				-2	-2	7	4	2	3	0.334				-2	-2	4	4	1	4	0.803
	-2	-2	1	4	2	2	0.075				-2	-2	4	4	3	1	0.058				-2	-2	6	4	1	3	0.266				-2	-2	5	4	0	4	0.059
	-2	-2	1	4	4	0	0.061				0	0	2	4	1	3	0.041				-2	-2	4	4	4	1	0.134				-2	-2	6	4	0	4	0.058
5315.13	-2	-2	1	4	4	0	0.92	0.922		6286.87	-2	-2	7	4	1	3	0.367	0.423		6306.58	-2	-2	4	4	4	1	0.531	0.548		5886.42	-2	-2	3	4	3	2	0.962	0.973
	-2	-2	1	4	4	0	0.92				-2	-2	7	4	1	3	0.367				-2	-2	4	4	4	1	0.531				-2	-2	3	4	3	2	0.962
	-2	-2	2	4	3	2	0.054				-2	-2	6	4	2	3	0.356				-2	-2	5	4	3	1	0.142				-2	-2	9	4	2	2	0.016
	-2	-2	8	4	3	2	0.01				-2	-2	7	4	3	1	0.057				-2	-2	6	4	1	3	0.122				-2	-2	3	4	1	4	0.01
5692.85	-2	-2	3	4	0	4	0.931	0.931		6452.21	-2	-2	5	4	4	1	0.826	0.829		6372.57	-2	-2	5	4	3	1	0.565	0.629		6111.86	-2	-2	4	4	3	2	0.577	0.579
	-2	-2	3	4	0	4	0.931				-2	-2	5	4	4	1	0.826				-2	-2	5	4	3	1	0.565				-2	-2	4	4	3	2	0.577
	-2	-2	9	4	1	4	0.057				-2	-2	7	4	3	1	0.091				-2	-2	4	4	4	1	0.243				-2	-2	7	4	1	4	0.134
	-2	-2	2	4	1	4	0.004				0	0	2	4	3	1	0.007				-2	-2	5	4	1	3	0.064				-2	-2	6	4	0	4	0.127
5824.04	-2	-2	3	4	2	2	0.984	0.984		6502.42	-2	-2	7	4	1	3	0.419	0.721		6488.34	-2	-2	6	4	3	1	0.424	0.78		6118.15	-2	-2	5	4	0	4	0.236	0.251
	-2	-2	3	4	2	2	0.984				-2	-2	7	4	1	3	0.419				-2	-2	6	4	3	1	0.424				-2	-2	5	4	0	4	0.236
	-2	-2	9	4	3	2	0.007				-2	-2	7	4	3	1	0.303				-2	-2	6	4	1	3	0.356				-2	-2	4	4	3	2	0.148
	-2	-2	9	4	1	4	0.004				-2	-2	6	4	2	3	0.101				-2	-2	7	4	2	3	0.073				-2	-2	6	4	0	4	0.135
5839.96	-2	-2	4	4	0	4	0.828	0.836		6558.73	-2	-2	6	4	2	3	0.295	0.471		6567.96	-2	-2	7	4	2	3	0.337	0.42		6159.88	-2	-2	5	4	0	4	0.331	0.335
	-2	-2	4	4	0	4	0.828				-2	-2	6	4	2	3	0.295				-2	-2	7	4	2	3	0.337				-2	-2	5	4	0	4	0.331
	-2	-2	5	4	1	4	0.054				-2	-2	7	4	3	1	0.267				-2	-2	6	4	3	1	0.256				-2	-2	4	4	3	2	0.158
	-2	-2	6	4	1	4	0.052				-2	-2	6	4	4	1	0.175				-2	-2	6	4	1	3	0.114				-2	-2	4	4	1	4	0.128
6001.17	-2	-2	3	4	4	0	0.978	0.979		6676.52	-2	-2	6	4	4	1	0.702	0.711		6670.93	-2	-2	7	4	4	1	0.791	0.794		6311.17	-2	-2	5	4	2	2	0.82	0.841
	-2	-2	3	4	4	0	0.978				-2	-2	6	4	4	1	0.702				-2	-2	7	4	4	1	0.791				-2	-2	5	4	2	2	0.82
	-2	-2	9	4	3	2	0.011				-2	-2	7	4	3	1	0.172				-2	-2	6	4	3	1	0.135				-2	-2	4	4	3	2	0.053
	1	0	0	4	4	0	0.003				-2	-2	5	4	4	1	0.056				0	1	1	4	3	1	0.006				0	0	2	4	3	2	0.025
6004.82	-2	-2	4	4	2	2	0.932	0.934		6807.66	1	2	0	4	1	3	0.65	0.652		6832.62	1	2	0	4	2	3	0.483	0.484		6403.94	-2	-2	6	4	2	2	0.556	0.596
	-2	-2	4	4	2	2	0.932				1	2	0	4	1	3	0.65				1	2	0	4	2	3	0.483				-2	-2	6	4	2	2	0.556
	-2	-2	5	4	1	4	0.021				1	0	2	4	1	3	0.23				1	0	2	4	2	3	0.294				-2	-2	7	4	3	2	0.297
	-2	-2	6	4	1	4	0.014				-2	-2	8	4	2	3	0.081				-2	-2	8	4	1	3	0.162				-2	-2	6	4	0	4	0.028
6116.91	-2	-2	6	4	1	4	0.25	0.25		6856.21	1	0	2	4	1	3	0.371	0.436		6862.48	1	2	0	4	2	3	0.379	0.379		6454.33	-2	-2	5	4	4	0	0.838	0.844
	-2	-2	6	4	1	4	0.25				1	0	2	4	1	3	0.371				1	2	0	4	2	3	0.379				-2	-2	5	4	4	0	0.838
	-2	-2	7	4	0	4	0.224				1	2	0	4	1	3	0.236				1	0	2	4	2	3	0.321				-2	-2	6	4	2	2	0.044
	-2	-2	5	4	1	4	0.145				-2	-2	8	4	2	3	0.13				-2	-2	8	4	1	3	0.055				-2	-2	7	4	3	2	0.027
6153.39	-2	-2	5	4	1	4	0.411	0.413		6953.18	1	2	0	4	3	1	0.837	0.854		7055.54	-2	-2	8	4	1	3	0.614	0.629		6485.2	-2	-2	7	4	1	4	0.311	0.36
	-2	-2	5	4	1	4	0.411				1	2	0	4	3	1	0.837				-2	-2	8	4	1	3	0.614				-2	-2	6	4	0	4	0.313
	-2	-2	7	4	0	4	0.136				-2	-2	8	4	2	3	0.073				1	0	2	4	2	3	0.123				-2	-2	7	4	1	4	0.311
	-2	-2	4	4	0	4	0.105				1	2	0	4	1	3	0.017				1	2	0	4	4	1	0.095				-2	-2	7	4	3	2	0.049
6293.08	-2	-2	4	4	4	0	0.631	0.632		7008.98	1	0	2	4	3	1	0.646	0.843		7073.09	1	2	0	4	4	1	0.648	0.648		6562.4	-2	-2	6	4	2	2	0.285	0.517
	-2	-2	4	4	4	0	0.631				1	0	2	4	3	1	0.646				1	2	0	4	4	1	0.648				-2	-2	7	4	3	2	0.357
	-2	-2	5	4	3	2	0.272				1	0	2	4	1	3	0.198				1	0	2	4	4	1	0.126				-2	-2	6	4	2	2	0.285
	-2	-2	6	4	3	2	0.027				-2	-2	8	4	2	3	0.043				-2	-2	8	4	1	3	0.098				-2	-2	6	4	4	0	0.231
6365.64	-2	-2	5	4	3	2	0.546	0.546		7097.16	-2	-2	8	4	2	3	0.57	0.583		7108.58	-2	-2	8	4	3	1	0.462	0.466		6676.44	-2	-2	6	4	4	0	0.684	0.699
	-2	-2	5	4	3	2	0.546				-2	-2	8	4	2	3	0.57				-2	-2	8	4	3	1	0.462				-2	-2	6	4	4	0	0.684
	-2	-2	4	4	4	0	0.289				1	0	2	4	3	1	0.146				1	0	2	4	4	1	0.384				-2	-2	7	4	3	2	0.17
	0	0	2	4	4	0	0.019				1	0	2	4	1	3	0.091				1	0	2	4	2	3	0.064				-2	-2	5	4	4	0	0.057
6414.02	-2	-2	7	4	2	2	0.521	0.562		7259.16	-2	-2	8	4	4	1	0.923	0.923		7200.63	1	0	2	4	4	1	0.389	0.403		6693.85	1	0	2	4	1	4	0.456	0.461
	-2	-2	7	4	2	2	0.521				-2	-2	8	4	4	1	0.923				1	0	2	4	4	1	0.389				1	0	2	4	1	4	0.456
	-2	-2	6	4	3	2	0.317				1	0	2	4	3	1	0.038				-2	-2	8	4	3	1	0.359				-2	-2	8	4	0	4	0.265
	-2	-2	4	4	4	0	0.031				-2	-2	1	4	3	1	0.002				1	2	0	4	4	1	0.19				1	2	0	4	1	4	0.135
6480.89	-2	-2	6	4	1	4	0.3	0.358		7550.68	-2	-2	9	4	2	3	0.568	0.569		7547.96	-2	-2	9	4	1	3	0.601	0.655		6742.51	1	2	0	4	1	4	0.623	0.635
	-2	-2	7	4	0	4	0.33				-2	-2	9	4	2	3	0.568				-2	-2	9	4	1	3	0.601				1	2	0	4	1	4	0.623
	-2	-2	6	4	1	4	0.3				-2	-2	11	4	1	3	0.255				-2	-2	11	4	2	3	0.209				-2	-2	2	4	0	4	0.073
	-2	-2	6	4	3	2	0.058				-2	-2	10	4	1	3	0.043				-2	-2	9	4	3	1	0.055				1	0	2	4	1	4	0.052
6568.2	-2	-2	7	4	2	2	0.353	0.487		7584.51	-2	-2	10	4	1	3	0.828	0.829		7645.03	-2	-2	10	4	2	3	0.796	0.798		6949.16	1	2	0	4	3	2	0.822	0.825
	-2	-2	7	4	2	2	0.353				-2	-2	10	4	1	3	0.828				-2	-2	10	4	2	3	0.796				1	2	0	4	3	2	0.822
	-2	-2	6	4	3	2	0.349				-2	-2	11	4	1	3	0.125				-2	-2	11	4	2	3	0.121				-2	-2	8	4	2	2	0.062
	-2	-2	7	4	4	0	0.129				-2	-2	10	4	3	1	0.002				-2	-2	10	4	4	1	0.002				-2	-2	8	4	0	4	0.026
6670.58	-2	-2	7	4	4	0	0.782	0.789		7648.67	-2	-2	11	4	1	3	0.592	0.613		7675.95	-2	-2	11	4	2	3	0.506	0.506		6975.06	1	0	2	4	3	2	0.622	0.626
	-2	-2	7	4	4	0	0.782				-2	-2	11	4	1	3	0.592				-2	-2	11	4	2	3	0.506				1	0	2	4	3	2	0.622
	-2	-2	6	4	3	2	0.133				-2	-2	9	4	2	3	0.236				-2	-2	9	4	1	3	0.294				-2	-2	8	4	2	2	0.226
	-2	-2	7	4	2	2	0.007				-2	-2	10	4	1	3	0.085				-2	-2	9	4	3	1	0.078				-2	-2	8	4	4	0	0.021
6692.78	1	0	2	4	0	4	0.46	0.46		7756.09	-2	-2	11	4	3	1	0.684	0.685		7694.36	-2	-2	9	4	3	1	0.756	0.768		7009.1	-2	-2	8	4	0	4	0.517	0.537
	1	0	2	4	0	4	0.46				-2	-2	11	4	3	1	0.684				-2	-2	9	4	3	1	0.756				-2	-2	8	4	0	4	0.517
	-2	-2	8	4	1	4	0.26				-2	-2	9	4	4	1	0.129				-2	-2	11	4	2	3	0.121				1	0	2	4	1	4	0.189
	1	2	0	4	0	4	0.151				-2	-2	10	4	3	1	0.101				-2	-2	11	4	4	1	0.023				1	2	0	4	1	4	0.04
6740.95	1	2	0	4	0	4	0.624	0.625		7795.19	-2	-2	9	4	4	1	0.823	0.823		7888.63	-2	-2	11	4	4	1	0.826	0.827		7104.46	-2	-2	8	4	2	2	0.645	0.671
	1	2	0	4	0	4	0.624				-2	-2	9	4	4	1	0.823				-2	-2	11	4	4	1	0.826				-2	-2	8	4	2	2	0.645
	-2	-2	2	4	1	4	0.077				-2	-2	11	4	3	1	0.116				-2	-2	10	4	4	1	0.121				1	0	2	4	3	2	0.199
	1	0	2	4	0	4	0.055				-2	-2	10	4	3	1	0.019				-2	-2	9	4	3	1	0.024				1	2	0	4	3	2	0.055
6869.11	1	2	0	4	2	2	0.829	0.829		7809.05	-2	-2	10	4	3	1	0.788	0.789		7990.71	-2	-2	10	4	4	1	0.114	0.127		7259.01	-2	-2	8	4	4	0	0.923	0.924
	1	2	0	4	2	2	0.829				-2	-2	10	4	3	1	0.788				-2	-2	10	4	4	1	0.114				-2	-2	8	4	4	0	0.923
	1	0	2	4	2	2	0.101				-2	-2	11	4	3	1	0.12				-2	-2	5	4	3	1	0.031				1	0	2	4	3	2	0.037
	-2	-2	8	4	1	4	0.021				-2	-2	4	4	1	3	0.002				-2	-2	5	4	1	3	0.03				-2	-2	1	4	3	2	0.002
6943.49	1	0	2	4	2	2	0.707	0.73																						7425.86	-2	-2	9	4	0	4	0.537	0.54
	1	0	2	4	2	2	0.707																								-2	-2	9	4	0	4	0.537
	1	2	0	4	2	2	0.092																								-2	-2	11	4	1	4	0.237
	-2	-2	8	4	3	2	0.089																								-2	-2	3	4	1	4	0.037
7011.93	-2	-2	8	4	1	4	0.517	0.544																						7500.1	-2	-2	10	4	1	4	0.723	0.75
	-2	-2	8	4	1	4	0.517																								-2	-2	10	4	1	4	0.723
	1	0	2	4	0	4	0.206																								-2	-2	11	4	1	4	0.113
	1	2	0	4	0	4	0.035																								-2	-2	10	4	3	2	0.027
7071.09	1	2	0	4	4	0	0.741	0.743																						7596.12	-2	-2	11	4	1	4	0.54	0.571
	1	2	0	4	4	0	0.741																								-2	-2	11	4	1	4	0.54
	1	0	2	4	4	0	0.162																								-2	-2	9	4	0	4	0.197
	-2	-2	8	4	3	2	0.041																								-2	-2	10	4	1	4	0.087
7112.19	1	0	2	4	4	0	0.401	0.491																						7627.92	-2	-2	9	4	2	2	0.826	0.856
	-2	-2	8	4	3	2	0.424																								-2	-2	9	4	2	2	0.826
	1	0	2	4	4	0	0.401																								-2	-2	11	4	3	2	0.07
	1	0	2	4	2	2	0.09																								-2	-2	9	4	0	4	0.025
7200.68	1	0	2	4	4	0	0.377	0.401																						7759.35	-2	-2	11	4	3	2	0.641	0.658
	1	0	2	4	4	0	0.377																								-2	-2	11	4	3	2	0.641
	-2	-2	8	4	3	2	0.351																								-2	-2	9	4	4	0	0.117
	1	2	0	4	4	0	0.191																								-2	-2	9	4	2	2	0.099
7425.93	-2	-2	9	4	1	4	0.533	0.537																						7794.89	-2	-2	9	4	4	0	0.834	0.834
	-2	-2	9	4	1	4	0.533																								-2	-2	9	4	4	0	0.834
	-2	-2	11	4	0	4	0.239																								-2	-2	11	4	3	2	0.104
	-2	-2	10	4	0	4	0.038																								-2	-2	10	4	3	2	0.018
7491.66	-2	-2	10	4	0	4	0.739	0.761																						7805.85	-2	-2	10	4	3	2	0.731	0.739
	-2	-2	10	4	0	4	0.739																								-2	-2	10	4	3	2	0.731
	-2	-2	11	4	0	4	0.115																								-2	-2	11	4	3	2	0.111
	-2	-2	10	4	2	2	0.022																								-2	-2	10	4	1	4	0.008
7591	-2	-2	11	4	0	4	0.547	0.588																						7858.37	-2	-2	5	4	0	4	0.111	0.12
	-2	-2	11	4	0	4	0.547																								-2	-2	5	4	0	4	0.111
	-2	-2	9	4	1	4	0.197																								-2	-2	10	4	3	2	0.048
	-2	-2	10	4	0	4	0.086																								-2	-2	10	4	1	4	0.036
7651.63	-2	-2	11	4	2	2	0.447	0.472
	-2	-2	11	4	2	2	0.447
	-2	-2	9	4	3	2	0.387
	-2	-2	10	4	2	2	0.076
7664.26	-2	-2	10	4	2	2	0.807	0.82
	-2	-2	10	4	2	2	0.807
	-2	-2	11	4	2	2	0.128
	-2	-2	10	4	0	4	0.01
7701.54	-2	-2	9	4	3	2	0.5	0.507
	-2	-2	9	4	3	2	0.5
	-2	-2	11	4	2	2	0.36
	-2	-2	10	4	2	2	0.05
7855.77	-2	-2	5	4	1	4	0.124	0.125
	-2	-2	5	4	1	4	0.124
	-2	-2	10	4	0	4	0.026
	-2	-2	6	4	1	4	0.014

## Sheet: J=5
A1 symmetry										A2 symmetry										B1 symmetry										B2 symmetry
Erovib	n1	n2	n3	J	Ka	Kc	RRD^2	FullVib		Erovib	n1	n2	n3	J	Ka	Kc	RRD^2	FullVib		Erovib	n1	n2	n3	J	Ka	Kc	RRD^2	FullVib		Erovib	n1	n2	n3	J	Ka	Kc	RRD^2	FullVib
585.63	0	0	0	5	2	4	0.945	0.945		460.91	0	0	0	5	1	5	0.86	0.911		460.39	0	0	0	5	0	5	0.911	0.911		574.8	0	0	0	5	1	4	0.911	0.953
	0	0	0	5	2	4	0.945				0	0	0	5	1	5	0.86				0	0	0	5	0	5	0.911				0	0	0	5	1	4	0.911
	0	0	1	5	1	4	0.04				0	0	1	5	0	5	0.082				0	0	1	5	1	5	0.079				0	0	1	5	2	4	0.043
	0	0	1	5	3	2	0.011				0	0	0	5	3	3	0.05				0	0	2	5	0	5	0.004				0	0	0	5	3	2	0.042
820.46	0	0	0	5	4	2	0.972	0.973		696.06	0	0	0	5	3	3	0.918	0.964		643.36	0	0	0	5	2	3	0.979	0.979		709.7	0	0	0	5	3	2	0.925	0.979
	0	0	0	5	4	2	0.972				0	0	0	5	3	3	0.918				0	0	0	5	2	3	0.979				0	0	0	5	3	2	0.925
	0	0	1	5	3	2	0.021				0	0	0	5	1	5	0.047				0	0	1	5	3	3	0.012				0	0	0	5	1	4	0.053
	0	0	1	5	5	0	0.003				0	0	1	5	2	3	0.026				0	0	1	5	1	5	0.005				0	0	1	5	2	4	0.011
2505.5	0	1	0	5	2	4	0.721	0.721		976.33	0	0	0	5	5	1	0.979	0.979		821.38	0	0	0	5	4	1	0.974	0.974		976.34	0	0	0	5	5	0	0.979	0.979
	0	1	0	5	2	4	0.721				0	0	0	5	5	1	0.979				0	0	0	5	4	1	0.974				0	0	0	5	5	0	0.979
	0	0	1	5	1	4	0.181				0	0	1	5	4	1	0.015				0	0	1	5	3	3	0.018				0	0	1	5	4	2	0.015
	0	0	1	5	3	2	0.03				1	0	0	5	5	1	0.004				0	0	1	5	5	1	0.003				1	0	0	5	5	0	0.004
2689.89	0	0	1	5	1	4	0.503	0.594		2356.42	0	1	0	5	1	5	0.601	0.635		2356.11	0	1	0	5	0	5	0.637	0.637		2497.52	0	1	0	5	1	4	0.731	0.773
	0	0	1	5	1	4	0.503				0	1	0	5	1	5	0.601				0	1	0	5	0	5	0.637				0	1	0	5	1	4	0.731
	0	1	0	5	2	4	0.222				0	0	1	5	0	5	0.24				0	0	1	5	1	5	0.228				0	0	1	5	2	4	0.165
	0	0	1	5	3	2	0.091				0	0	2	5	1	5	0.045				0	0	2	5	0	5	0.046				0	1	0	5	3	2	0.043
2753.89	0	0	1	5	3	2	0.411	0.591		2579.51	0	0	1	5	0	5	0.436	0.453		2565.24	0	1	0	5	2	3	0.437	0.594		2637.54	0	1	0	5	3	2	0.462	0.667
	0	0	1	5	3	2	0.411				0	0	1	5	0	5	0.436				0	1	0	5	2	3	0.437				0	1	0	5	3	2	0.462
	0	1	0	5	4	2	0.375				0	1	0	5	1	5	0.194				0	0	1	5	1	5	0.273				0	0	1	5	2	4	0.253
	0	0	1	5	1	4	0.178				0	1	0	5	3	3	0.141				0	1	0	5	0	5	0.157				0	1	0	5	1	4	0.205
2849.44	0	1	0	5	4	2	0.556	0.56		2637.41	0	1	0	5	3	3	0.564	0.668		2605.07	0	1	0	5	2	3	0.488	0.616		2722.22	0	1	0	5	3	2	0.451	0.48
	0	1	0	5	4	2	0.556				0	1	0	5	3	3	0.564				0	1	0	5	2	3	0.488				0	1	0	5	3	2	0.451
	0	0	1	5	3	2	0.366				0	0	1	5	2	3	0.216				0	0	1	5	1	5	0.197				0	0	1	5	2	4	0.407
	0	0	1	5	1	4	0.025				0	1	0	5	1	5	0.104				0	1	0	5	0	5	0.127				0	0	2	5	1	4	0.04
3024.7	0	0	1	5	5	0	0.952	0.953		2766.31	0	0	1	5	2	3	0.689	0.689		2739.57	0	0	1	5	3	3	0.53	0.545		2870.32	0	0	1	5	4	2	0.804	0.808
	0	0	1	5	5	0	0.952				0	0	1	5	2	3	0.689				0	0	1	5	3	3	0.53				0	0	1	5	4	2	0.804
	0	0	2	5	4	2	0.029				0	1	0	5	3	3	0.224				0	1	0	5	4	1	0.345				0	1	0	5	5	0	0.108
	0	1	0	5	4	2	0.005				0	0	0	5	3	3	0.021				0	1	0	5	2	3	0.034				0	0	2	5	3	2	0.035
3314.92	1	0	0	5	2	4	0.94	0.94		2871.9	0	0	1	5	4	1	0.811	0.821		2843.43	0	1	0	5	4	1	0.624	0.642		2998.41	0	1	0	5	5	0	0.867	0.869
	1	0	0	5	2	4	0.94				0	0	1	5	4	1	0.811				0	1	0	5	4	1	0.624				0	1	0	5	5	0	0.867
	-2	-2	2	5	1	4	0.041				0	1	0	5	5	1	0.109				0	0	1	5	3	3	0.285				0	0	1	5	4	2	0.102
	-2	-2	2	5	3	2	0.011				0	0	2	5	3	3	0.028				0	1	0	5	2	3	0.018				0	1	1	5	4	2	0.013
3542.94	1	0	0	5	4	2	0.965	0.965		2998.52	0	1	0	5	5	1	0.865	0.867		3024.66	0	0	1	5	5	1	0.952	0.953		3304.6	1	0	0	5	1	4	0.905	0.949
	1	0	0	5	4	2	0.965				0	1	0	5	5	1	0.865				0	0	1	5	5	1	0.952				1	0	0	5	1	4	0.905
	-2	-2	2	5	3	2	0.022				0	0	1	5	4	1	0.104				0	0	2	5	4	1	0.029				-2	-2	2	5	2	4	0.044
	-2	-2	3	5	4	2	0.004				0	1	1	5	4	1	0.013				0	1	0	5	4	1	0.005				1	0	0	5	3	2	0.044
4361.75	0	2	0	5	2	4	0.77	0.771		3192.64	1	0	0	5	1	5	0.855	0.904		3192.14	1	0	0	5	0	5	0.905	0.905		3436.24	1	0	0	5	3	2	0.918	0.974
	0	2	0	5	2	4	0.77				1	0	0	5	1	5	0.855				1	0	0	5	0	5	0.905				1	0	0	5	3	2	0.918
	0	1	1	5	1	4	0.126				-2	-2	2	5	0	5	0.084				-2	-2	2	5	1	5	0.08				1	0	0	5	1	4	0.057
	0	0	2	5	2	4	0.035				1	0	0	5	3	3	0.049				-2	-2	2	5	3	3	0.003				-2	-2	2	5	2	4	0.012
4527.8	0	0	2	5	2	4	0.39	0.393		3422.57	1	0	0	5	3	3	0.914	0.959		3371.95	1	0	0	5	2	3	0.976	0.976		3692.81	1	0	0	5	5	0	0.97	0.97
	0	0	2	5	2	4	0.39				1	0	0	5	3	3	0.914				1	0	0	5	2	3	0.976				1	0	0	5	5	0	0.97
	0	1	1	5	1	4	0.157				1	0	0	5	1	5	0.045				-2	-2	2	5	3	3	0.013				-2	-2	2	5	4	2	0.015
	0	2	0	5	2	4	0.121				-2	-2	2	5	2	3	0.027				-2	-2	2	5	1	5	0.005				-2	-2	3	5	5	0	0.008
4656.49	0	2	0	5	4	2	0.753	0.755		3692.79	1	0	0	5	5	1	0.97	0.97		3543.88	1	0	0	5	4	1	0.966	0.967		4345.83	0	2	0	5	1	4	0.809	0.826
	0	2	0	5	4	2	0.753				1	0	0	5	5	1	0.97				1	0	0	5	4	1	0.966				0	2	0	5	1	4	0.809
	0	1	1	5	3	2	0.146				-2	-2	2	5	4	1	0.015				-2	-2	2	5	3	3	0.019				0	1	1	5	2	4	0.1
	0	1	1	5	1	4	0.027				-2	-2	3	5	5	1	0.008				-2	-2	3	5	4	1	0.004				0	0	2	5	1	4	0.028
4713.55	0	1	1	5	1	4	0.565	0.629		4205.73	0	2	0	5	1	5	0.598	0.64		4204.98	0	2	0	5	0	5	0.644	0.645		4493.13	0	2	0	5	3	2	0.442	0.56
	0	1	1	5	1	4	0.565				0	2	0	5	1	5	0.598				0	2	0	5	0	5	0.644				0	2	0	5	3	2	0.442
	0	0	2	5	2	4	0.135				0	1	1	5	0	5	0.199				0	1	1	5	1	5	0.186				0	1	1	5	2	4	0.201
	0	1	1	5	3	2	0.063				0	0	2	5	1	5	0.061				0	0	2	5	0	5	0.064				0	2	0	5	1	4	0.118
4801.98	0	0	2	5	4	2	0.335	0.464		4369.34	0	0	2	5	1	5	0.295	0.302		4366.83	0	0	2	5	0	5	0.282	0.286		4549.34	0	2	0	5	3	2	0.439	0.448
	0	0	2	5	4	2	0.335				0	0	2	5	1	5	0.295				0	0	2	5	0	5	0.282				0	2	0	5	3	2	0.439
	0	1	1	5	3	2	0.274				0	2	0	5	1	5	0.167				0	2	0	5	0	5	0.186				0	0	2	5	1	4	0.257
	0	0	2	5	2	4	0.129				-2	-2	5	5	0	5	0.145				0	1	1	5	1	5	0.138				-2	-2	5	5	2	4	0.087
4849.52	0	0	2	5	4	2	0.425	0.429		4500.95	0	2	0	5	3	3	0.762	0.818		4431.1	0	2	0	5	2	3	0.877	0.889		4733.62	0	0	2	5	3	2	0.528	0.573
	0	0	2	5	4	2	0.425				0	2	0	5	3	3	0.762				0	2	0	5	2	3	0.877				0	0	2	5	3	2	0.528
	0	1	1	5	3	2	0.331				0	1	1	5	2	3	0.108				0	0	2	5	0	5	0.028				0	1	1	5	4	2	0.184
	0	2	0	5	4	2	0.074				0	2	0	5	1	5	0.055				-2	-2	5	5	1	5	0.023				0	1	1	5	2	4	0.117
5054.23	0	1	1	5	5	0	0.887	0.887		4635.96	0	1	1	5	0	5	0.3	0.478		4623.69	0	1	1	5	3	3	0.376	0.389		4757.78	0	0	2	5	1	4	0.369	0.399
	0	1	1	5	5	0	0.887				0	1	1	5	0	5	0.3				0	1	1	5	3	3	0.376				0	0	2	5	1	4	0.369
	0	0	2	5	4	2	0.06				0	1	1	5	2	3	0.164				0	0	2	5	2	3	0.244				0	1	1	5	2	4	0.366
	-2	-2	7	5	4	2	0.029				0	0	2	5	1	5	0.13				0	2	0	5	4	1	0.235				0	2	0	5	3	2	0.058
5153.69	-2	-2	1	5	2	4	0.518	0.518		4677.39	0	0	2	5	3	3	0.359	0.4		4651	0	1	1	5	1	5	0.337	0.338		4845.86	0	2	0	5	5	0	0.605	0.606
	-2	-2	1	5	2	4	0.518				0	0	2	5	3	3	0.359				0	1	1	5	1	5	0.337				0	2	0	5	5	0	0.605
	-2	-2	2	5	1	4	0.322				0	1	1	5	0	5	0.135				0	2	0	5	4	1	0.197				0	1	1	5	4	2	0.222
	-2	-2	2	5	3	2	0.052				0	1	1	5	2	3	0.125				0	0	2	5	0	5	0.145				0	0	2	5	3	2	0.087
5308.43	-2	-2	1	5	2	4	0.425	0.44		4763.17	0	1	1	5	2	3	0.519	0.658		4689.42	0	2	0	5	4	1	0.407	0.429		4934.32	0	0	2	5	5	0	0.267	0.366
	-2	-2	1	5	2	4	0.425				0	1	1	5	2	3	0.519				0	2	0	5	4	1	0.407				0	1	1	5	4	2	0.364
	-2	-2	2	5	1	4	0.371				0	0	2	5	3	3	0.197				0	0	2	5	2	3	0.329				0	0	2	5	5	0	0.267
	-2	-2	2	5	3	2	0.052				0	1	1	5	4	1	0.138				0	1	1	5	1	5	0.05				0	2	0	5	5	0	0.206
5366.36	-2	-2	2	5	3	2	0.636	0.809		4843.81	0	2	0	5	5	1	0.598	0.6		4822.74	0	0	2	5	4	1	0.459	0.711		4990.82	0	0	2	5	5	0	0.648	0.649
	-2	-2	2	5	3	2	0.636				0	2	0	5	5	1	0.598				0	0	2	5	4	1	0.459				0	0	2	5	5	0	0.648
	-2	-2	2	5	1	4	0.171				0	1	1	5	4	1	0.243				0	0	2	5	2	3	0.252				0	1	1	5	4	2	0.143
	-2	-2	1	5	4	2	0.136				0	0	2	5	3	3	0.068				0	1	1	5	3	3	0.145				0	2	0	5	5	0	0.141
5494.51	-2	-2	1	5	4	2	0.801	0.805		4932.7	0	1	1	5	4	1	0.36	0.366		4848.37	0	1	1	5	3	3	0.355	0.422		5150.25	-2	-2	1	5	1	4	0.532	0.58
	-2	-2	1	5	4	2	0.801				0	1	1	5	4	1	0.36				0	1	1	5	3	3	0.355				-2	-2	1	5	1	4	0.532
	-2	-2	2	5	3	2	0.133				0	0	2	5	5	1	0.267				0	0	2	5	4	1	0.315				-2	-2	2	5	2	4	0.319
	-2	-2	8	5	3	2	0.021				0	2	0	5	5	1	0.219				0	2	0	5	4	1	0.086				-2	-2	1	5	3	2	0.048
5606.41	-2	-2	2	5	5	0	0.932	0.934		4990.76	0	0	2	5	5	1	0.646	0.647		5001.99	-2	-2	1	5	0	5	0.461	0.461		5277.2	-2	-2	1	5	1	4	0.424	0.561
	-2	-2	2	5	5	0	0.932				0	0	2	5	5	1	0.646				-2	-2	1	5	0	5	0.461				-2	-2	1	5	1	4	0.424
	1	0	2	5	4	2	0.02				0	1	1	5	4	1	0.141				-2	-2	2	5	1	5	0.341				-2	-2	2	5	2	4	0.323
	-2	-2	1	5	4	2	0.014				0	2	0	5	5	1	0.14				1	0	2	5	0	5	0.045				-2	-2	1	5	3	2	0.137
5954.8	-2	-2	3	5	2	4	0.931	0.931		5002.21	-2	-2	1	5	1	5	0.435	0.457		5054.32	0	1	1	5	5	1	0.886	0.886		5363.86	-2	-2	1	5	3	2	0.743	0.749
	-2	-2	3	5	2	4	0.931				-2	-2	1	5	1	5	0.435				0	1	1	5	5	1	0.886				-2	-2	1	5	3	2	0.743
	-2	-2	9	5	1	4	0.043				-2	-2	2	5	0	5	0.354				0	0	2	5	4	1	0.061				-2	-2	2	5	2	4	0.156
	-2	-2	9	5	3	2	0.012				1	0	2	5	1	5	0.045				-2	-2	7	5	4	1	0.028				-2	-2	8	5	2	4	0.025
6117.93	-2	-2	4	5	2	4	0.832	0.836		5203.08	-2	-2	1	5	1	5	0.378	0.47		5198.64	-2	-2	1	5	0	5	0.415	0.509		5465.86	-2	-2	2	5	4	2	0.824	0.828
	-2	-2	4	5	2	4	0.832				-2	-2	1	5	1	5	0.378				-2	-2	1	5	0	5	0.415				-2	-2	2	5	4	2	0.824
	-2	-2	5	5	1	4	0.05				-2	-2	2	5	0	5	0.313				-2	-2	2	5	1	5	0.3				-2	-2	1	5	5	0	0.042
	-2	-2	6	5	1	4	0.049				-2	-2	1	5	3	3	0.092				-2	-2	1	5	2	3	0.094				-2	-2	1	5	3	2	0.036
6175.45	-2	-2	3	5	4	2	0.956	0.957		5276.84	-2	-2	2	5	2	3	0.484	0.523		5258.15	-2	-2	1	5	2	3	0.736	0.776		5655.2	-2	-2	1	5	5	0	0.921	0.922
	-2	-2	3	5	4	2	0.956				-2	-2	2	5	2	3	0.484				-2	-2	1	5	2	3	0.736				-2	-2	1	5	5	0	0.921
	-2	-2	9	5	3	2	0.024				-2	-2	1	5	3	3	0.354				-2	-2	2	5	3	3	0.148				-2	-2	2	5	4	2	0.038
	-2	-2	2	5	5	0	0.004				-2	-2	1	5	1	5	0.058				-2	-2	1	5	0	5	0.04				-2	-2	8	5	4	2	0.014
6397.87	-2	-2	6	5	1	4	0.227	0.326		5387.36	-2	-2	1	5	3	3	0.477	0.516		5355.03	-2	-2	2	5	3	3	0.608	0.628		5945.5	-2	-2	3	5	1	4	0.891	0.941
	-2	-2	7	5	2	4	0.31				-2	-2	1	5	3	3	0.477				-2	-2	2	5	3	3	0.608				-2	-2	3	5	1	4	0.891
	-2	-2	6	5	1	4	0.227				-2	-2	2	5	2	3	0.414				-2	-2	1	5	2	3	0.134				-2	-2	3	5	3	2	0.049
	-2	-2	6	5	3	2	0.098				-2	-2	1	5	1	5	0.038				-2	-2	1	5	4	1	0.133				-2	-2	9	5	2	4	0.047
6409.8	-2	-2	5	5	1	4	0.339	0.488		5466.93	-2	-2	2	5	4	1	0.843	0.852		5492.51	-2	-2	1	5	4	1	0.82	0.831		6074.01	-2	-2	3	5	3	2	0.905	0.969
	-2	-2	5	5	1	4	0.339				-2	-2	2	5	4	1	0.843				-2	-2	1	5	4	1	0.82				-2	-2	3	5	3	2	0.905
	-2	-2	4	5	4	2	0.164				-2	-2	1	5	5	1	0.042				-2	-2	2	5	3	3	0.103				-2	-2	3	5	1	4	0.065
	-2	-2	5	5	3	2	0.148				1	0	2	5	3	3	0.022				-2	-2	8	5	3	3	0.02				-2	-2	9	5	2	4	0.012
6467.22	-2	-2	4	5	4	2	0.507	0.554		5655.24	-2	-2	1	5	5	1	0.92	0.921		5606.39	-2	-2	2	5	5	1	0.932	0.933		6090.43	-2	-2	4	5	1	4	0.88	0.883
	-2	-2	4	5	4	2	0.507				-2	-2	1	5	5	1	0.92				-2	-2	2	5	5	1	0.932				-2	-2	4	5	1	4	0.88
	-2	-2	5	5	1	4	0.209				-2	-2	2	5	4	1	0.039				1	0	2	5	4	1	0.021				-2	-2	6	5	2	4	0.035
	-2	-2	6	5	1	4	0.079				-2	-2	8	5	4	1	0.014				-2	-2	1	5	4	1	0.014				-2	-2	5	5	2	4	0.034
6569.58	-2	-2	5	5	3	2	0.503	0.657		5834.09	-2	-2	3	5	1	5	0.845	0.891		5833.66	-2	-2	3	5	0	5	0.892	0.892		6270.2	-2	-2	4	5	3	2	0.797	0.829
	-2	-2	5	5	3	2	0.503				-2	-2	3	5	1	5	0.845				-2	-2	3	5	0	5	0.892				-2	-2	4	5	3	2	0.797
	-2	-2	5	5	1	4	0.154				-2	-2	9	5	0	5	0.087				-2	-2	9	5	1	5	0.084				-2	-2	5	5	2	4	0.063
	-2	-2	4	5	4	2	0.147				-2	-2	3	5	3	3	0.046				-2	-2	2	5	1	5	0.006				-2	-2	6	5	2	4	0.047
6671.27	-2	-2	6	5	3	2	0.394	0.67		5958.17	-2	-2	4	5	1	5	0.686	0.748		5956.28	-2	-2	4	5	0	5	0.747	0.753		6318.65	-2	-2	3	5	5	0	0.96	0.96
	-2	-2	6	5	3	2	0.394				-2	-2	4	5	1	5	0.686				-2	-2	4	5	0	5	0.747				-2	-2	3	5	5	0	0.96
	-2	-2	6	5	1	4	0.27				-2	-2	6	5	0	5	0.087				-2	-2	6	5	1	5	0.079				-2	-2	9	5	4	2	0.017
	-2	-2	7	5	4	2	0.18				-2	-2	5	5	0	5	0.069				-2	-2	5	5	1	5	0.062				1	0	0	5	5	0	0.007
6761.99	-2	-2	5	5	5	0	0.574	0.582		6059.7	-2	-2	3	5	3	3	0.91	0.951		6012.38	-2	-2	3	5	2	3	0.971	0.972		6402.25	-2	-2	6	5	2	4	0.258	0.262
	-2	-2	5	5	5	0	0.574				-2	-2	3	5	3	3	0.91				-2	-2	3	5	2	3	0.971				-2	-2	6	5	2	4	0.258
	-2	-2	7	5	4	2	0.145				-2	-2	3	5	1	5	0.042				-2	-2	9	5	3	3	0.013				-2	-2	7	5	1	4	0.175
	-2	-2	7	5	2	4	0.072				-2	-2	9	5	2	3	0.028				-2	-2	9	5	1	5	0.005				-2	-2	5	5	2	4	0.129
6767.33	-2	-2	7	5	2	4	0.248	0.254		6207.23	-2	-2	7	5	1	5	0.234	0.237		6166.59	-2	-2	4	5	2	3	0.86	0.869		6437.77	-2	-2	5	5	2	4	0.406	0.407
	-2	-2	7	5	2	4	0.248				-2	-2	7	5	1	5	0.234				-2	-2	4	5	2	3	0.86				-2	-2	5	5	2	4	0.406
	-2	-2	5	5	5	0	0.163				-2	-2	6	5	0	5	0.224				-2	-2	6	5	1	5	0.037				-2	-2	4	5	3	2	0.141
	-2	-2	6	5	3	2	0.128				0	0	2	5	1	5	0.102				-2	-2	7	5	0	5	0.02				-2	-2	7	5	1	4	0.121
6858.43	-2	-2	6	5	5	0	0.212	0.411		6254.74	-2	-2	4	5	3	3	0.576	0.577		6176.48	-2	-2	3	5	4	1	0.958	0.958		6606.49	-2	-2	5	5	4	2	0.59	0.602
	-2	-2	7	5	4	2	0.382				-2	-2	4	5	3	3	0.576				-2	-2	3	5	4	1	0.958				-2	-2	5	5	4	2	0.59
	-2	-2	6	5	5	0	0.212				-2	-2	5	5	0	5	0.153				-2	-2	9	5	3	3	0.02				-2	-2	4	5	5	0	0.137
	-2	-2	6	5	3	2	0.192				-2	-2	5	5	2	3	0.042				-2	-2	2	5	5	1	0.004				-2	-2	7	5	3	2	0.095
6966.03	1	0	2	5	2	4	0.425	0.425		6304.01	-2	-2	4	5	3	3	0.208	0.397		6210.04	-2	-2	7	5	0	5	0.207	0.209		6683.7	-2	-2	7	5	1	4	0.217	0.424
	1	0	2	5	2	4	0.425				-2	-2	5	5	0	5	0.223				-2	-2	7	5	0	5	0.207				-2	-2	6	5	4	2	0.239
	1	2	0	5	2	4	0.218				-2	-2	4	5	3	3	0.208				-2	-2	6	5	1	5	0.187				-2	-2	7	5	1	4	0.217
	-2	-2	8	5	1	4	0.212				-2	-2	4	5	1	5	0.188				0	0	2	5	0	5	0.111				-2	-2	7	5	3	2	0.188
7009.89	-2	-2	6	5	5	0	0.445	0.45		6318.63	-2	-2	3	5	5	1	0.96	0.96		6291.3	-2	-2	5	5	1	5	0.325	0.335		6713.89	-2	-2	4	5	5	0	0.661	0.663
	-2	-2	6	5	5	0	0.445				-2	-2	3	5	5	1	0.96				-2	-2	5	5	1	5	0.325				-2	-2	4	5	5	0	0.661
	1	2	0	5	2	4	0.199				-2	-2	9	5	4	1	0.017				-2	-2	4	5	0	5	0.129				-2	-2	7	5	3	2	0.187
	-2	-2	7	5	4	2	0.086				1	0	0	5	5	1	0.007				-2	-2	7	5	0	5	0.075				-2	-2	7	5	1	4	0.05
7023.12	1	2	0	5	2	4	0.363	0.365		6509.4	-2	-2	5	5	2	3	0.693	0.724		6435.79	-2	-2	4	5	4	1	0.653	0.655		6747.1	-2	-2	6	5	2	4	0.316	0.448
	1	2	0	5	2	4	0.363				-2	-2	5	5	2	3	0.693				-2	-2	4	5	4	1	0.653				-2	-2	6	5	2	4	0.316
	-2	-2	6	5	5	0	0.237				-2	-2	4	5	3	3	0.057				-2	-2	5	5	3	3	0.193				-2	-2	7	5	1	4	0.229
	1	0	2	5	2	4	0.057				0	0	2	5	3	3	0.039				-2	-2	6	5	3	3	0.067				-2	-2	6	5	4	2	0.133
7237.77	1	2	0	5	4	2	0.469	0.492		6555.62	-2	-2	6	5	2	3	0.382	0.435		6543.86	-2	-2	5	5	3	3	0.495	0.495		6874.31	-2	-2	6	5	4	2	0.368	0.382
	1	2	0	5	4	2	0.469				-2	-2	6	5	2	3	0.382				-2	-2	5	5	3	3	0.495				-2	-2	6	5	4	2	0.368
	-2	-2	8	5	1	4	0.224				-2	-2	7	5	3	3	0.346				-2	-2	4	5	4	1	0.134				-2	-2	7	5	3	2	0.246
	1	0	2	5	2	4	0.058				-2	-2	6	5	4	1	0.041				-2	-2	6	5	3	3	0.054				-2	-2	5	5	4	2	0.103
7252.83	-2	-2	8	5	3	2	0.313	0.596		6614.45	-2	-2	5	5	4	1	0.602	0.635		6568.97	-2	-2	7	5	2	3	0.398	0.427		6955.74	1	0	2	5	1	4	0.366	0.391
	-2	-2	8	5	3	2	0.313				-2	-2	5	5	4	1	0.602				-2	-2	7	5	2	3	0.398				1	0	2	5	1	4	0.366
	-2	-2	8	5	1	4	0.28				-2	-2	4	5	5	1	0.124				-2	-2	6	5	3	3	0.282				1	2	0	5	1	4	0.331
	1	2	0	5	4	2	0.184				-2	-2	6	5	2	3	0.082				-2	-2	4	5	4	1	0.133				-2	-2	8	5	2	4	0.191
7276.42	1	0	2	5	4	2	0.37	0.518		6661.41	-2	-2	7	5	1	5	0.227	0.259		6658.92	-2	-2	7	5	0	5	0.257	0.287		6996.47	-2	-2	7	5	5	0	0.708	0.709
	1	0	2	5	4	2	0.37				-2	-2	6	5	0	5	0.251				-2	-2	7	5	0	5	0.257				-2	-2	7	5	5	0	0.708
	-2	-2	8	5	1	4	0.153				-2	-2	7	5	1	5	0.227				-2	-2	6	5	1	5	0.223				-2	-2	6	5	4	2	0.074
	1	0	2	5	2	4	0.148				0	1	1	5	0	5	0.057				0	1	1	5	1	5	0.053				1	2	0	5	1	4	0.051
7391.83	-2	-2	8	5	3	2	0.445	0.467		6707.92	-2	-2	4	5	5	1	0.679	0.68		6758.33	-2	-2	5	5	5	1	0.515	0.52		7012.58	1	2	0	5	1	4	0.406	0.41
	-2	-2	8	5	3	2	0.445				-2	-2	4	5	5	1	0.679				-2	-2	5	5	5	1	0.515				1	2	0	5	1	4	0.406
	1	0	2	5	4	2	0.265				-2	-2	6	5	4	1	0.102				-2	-2	7	5	4	1	0.273				-2	-2	7	5	5	0	0.084
	1	2	0	5	4	2	0.159				-2	-2	5	5	4	1	0.09				-2	-2	7	5	2	3	0.101				1	0	2	5	1	4	0.083
7587.05	-2	-2	8	5	5	0	0.904	0.904		6755.43	-2	-2	6	5	2	3	0.314	0.609		6772.4	-2	-2	7	5	2	3	0.299	0.344		7123.17	1	2	0	5	3	2	0.716	0.745
	-2	-2	8	5	5	0	0.904				-2	-2	6	5	2	3	0.314				-2	-2	7	5	2	3	0.299				1	2	0	5	3	2	0.716
	1	0	2	5	4	2	0.035				-2	-2	6	5	4	1	0.294				-2	-2	5	5	5	1	0.218				-2	-2	8	5	2	4	0.063
	-2	-2	5	5	5	0	0.003				-2	-2	7	5	3	3	0.158				-2	-2	6	5	3	3	0.179				1	0	2	5	3	2	0.059
7694.52	-2	-2	9	5	1	4	0.461	0.537		6794.06	1	0	2	5	1	5	0.396	0.417		6793.99	1	0	2	5	0	5	0.41	0.411		7204.89	1	0	2	5	3	2	0.521	0.723
	-2	-2	9	5	1	4	0.461				1	0	2	5	1	5	0.396				1	0	2	5	0	5	0.41				1	0	2	5	3	2	0.521
	-2	-2	11	5	2	4	0.252				-2	-2	8	5	0	5	0.273				-2	-2	8	5	1	5	0.262				1	0	2	5	1	4	0.197
	-2	-2	9	5	3	2	0.076				1	2	0	5	1	5	0.072				1	2	0	5	0	5	0.082				-2	-2	8	5	4	2	0.068
7779.33	-2	-2	10	5	2	4	0.748	0.755		6869.96	1	2	0	5	1	5	0.25	0.257		6855.72	-2	-2	6	5	5	1	0.193	0.37		7283.82	-2	-2	8	5	2	4	0.509	0.525
	-2	-2	10	5	2	4	0.748				1	2	0	5	1	5	0.25				-2	-2	7	5	4	1	0.336				-2	-2	8	5	2	4	0.509
	-2	-2	11	5	2	4	0.118				-2	-2	6	5	4	1	0.193				-2	-2	6	5	5	1	0.193				1	0	2	5	1	4	0.13
	-2	-2	10	5	4	2	0.007				-2	-2	7	5	3	3	0.14				-2	-2	6	5	3	3	0.175				1	2	0	5	3	2	0.093
7855.37	-2	-2	11	5	2	4	0.554	0.563		6883.48	1	2	0	5	1	5	0.3	0.338		6878.51	1	2	0	5	0	5	0.546	0.549		7386.25	1	2	0	5	5	0	0.602	0.603
	-2	-2	11	5	2	4	0.554				1	2	0	5	1	5	0.3				1	2	0	5	0	5	0.546				1	2	0	5	5	0	0.602
	-2	-2	9	5	1	4	0.182				-2	-2	6	5	4	1	0.131				-2	-2	2	5	1	5	0.084				1	0	2	5	5	0	0.248
	-2	-2	10	5	2	4	0.09				-2	-2	7	5	3	3	0.093				-2	-2	6	5	1	5	0.048				-2	-2	8	5	4	2	0.06
7881.58	-2	-2	9	5	3	2	0.668	0.87		6998.43	-2	-2	7	5	5	1	0.791	0.792		7013.99	-2	-2	6	5	5	1	0.675	0.68		7418.67	-2	-2	8	5	4	2	0.574	0.574
	-2	-2	9	5	3	2	0.668				-2	-2	7	5	5	1	0.791				-2	-2	6	5	5	1	0.675				-2	-2	8	5	4	2	0.574
	-2	-2	9	5	1	4	0.199				-2	-2	6	5	4	1	0.102				-2	-2	7	5	4	1	0.132				1	0	2	5	5	0	0.242
	-2	-2	11	5	4	2	0.049				-2	-2	4	5	5	1	0.011				-2	-2	5	5	5	1	0.099				1	0	2	5	3	2	0.078
8059.98	-2	-2	11	5	4	2	0.714	0.716		7106.24	1	2	0	5	3	3	0.492	0.512		7042.62	1	2	0	5	2	3	0.686	0.688		7543.67	1	0	2	5	5	0	0.424	0.431
	-2	-2	11	5	4	2	0.714				1	2	0	5	3	3	0.492				1	2	0	5	2	3	0.686				1	0	2	5	5	0	0.424
	-2	-2	10	5	4	2	0.102				1	0	2	5	3	3	0.223				1	0	2	5	2	3	0.199				1	2	0	5	5	0	0.32
	-2	-2	9	5	5	0	0.065				-2	-2	8	5	2	3	0.167				-2	-2	8	5	1	5	0.023				-2	-2	8	5	4	2	0.183
8102.73	-2	-2	9	5	5	0	0.863	0.863		7137.62	1	0	2	5	3	3	0.311	0.35		7123.65	1	0	2	5	2	3	0.468	0.498		7694.9	-2	-2	9	5	2	4	0.503	0.504
	-2	-2	9	5	5	0	0.863				1	0	2	5	3	3	0.311				1	0	2	5	2	3	0.468				-2	-2	9	5	2	4	0.503
	-2	-2	11	5	4	2	0.061				1	2	0	5	3	3	0.23				-2	-2	8	5	3	3	0.161				-2	-2	11	5	1	4	0.241
	-2	-2	10	5	4	2	0.01				-2	-2	8	5	2	3	0.099				1	2	0	5	2	3	0.152				-2	-2	10	5	1	4	0.039
8126.51	-2	-2	10	5	4	2	0.257	0.271		7180.55	-2	-2	8	5	0	5	0.387	0.399		7178.47	-2	-2	8	5	1	5	0.405	0.431		7734.3	-2	-2	10	5	1	4	0.791	0.791
	-2	-2	10	5	4	2	0.257				-2	-2	8	5	0	5	0.387				-2	-2	8	5	1	5	0.405				-2	-2	10	5	1	4	0.791
	-2	-2	11	5	4	2	0.037				1	0	2	5	1	5	0.15				1	0	2	5	0	5	0.196				-2	-2	11	5	1	4	0.122
	-2	-2	5	5	1	4	0.032				1	2	0	5	1	5	0.07				1	2	0	5	0	5	0.048				-2	-2	4	5	3	2	0.004
8175.36	-2	-2	10	5	4	2	0.459	0.473		7303.46	-2	-2	8	5	2	3	0.639	0.69		7245.5	1	2	0	5	4	1	0.715	0.715		7829.61	-2	-2	11	5	1	4	0.583	0.603
	-2	-2	10	5	4	2	0.459				-2	-2	8	5	2	3	0.639				1	2	0	5	4	1	0.715				-2	-2	11	5	1	4	0.583
	-2	-2	11	5	4	2	0.069				1	0	2	5	3	3	0.15				-2	-2	8	5	3	3	0.155				-2	-2	9	5	2	4	0.191
	-2	-2	5	5	3	2	0.032				-2	-2	8	5	4	1	0.051				-2	-2	2	5	5	1	0.012				-2	-2	10	5	1	4	0.089
										7386.38	1	2	0	5	5	1	0.6	0.602		7286.23	1	0	2	5	4	1	0.572	0.724		7928.06	-2	-2	11	5	3	2	0.628	0.628
											1	2	0	5	5	1	0.6				1	0	2	5	4	1	0.572				-2	-2	11	5	3	2	0.628
											1	0	2	5	5	1	0.247				1	0	2	5	2	3	0.152				-2	-2	9	5	4	2	0.153
											-2	-2	8	5	4	1	0.063				-2	-2	8	5	3	3	0.111				-2	-2	10	5	3	2	0.082
										7417.33	-2	-2	8	5	4	1	0.578	0.582		7391.26	-2	-2	8	5	3	3	0.406	0.447		7950.08	-2	-2	10	5	3	2	0.761	0.766
											-2	-2	8	5	4	1	0.578				-2	-2	8	5	3	3	0.406				-2	-2	10	5	3	2	0.761
											1	0	2	5	5	1	0.241				1	0	2	5	4	1	0.225				-2	-2	11	5	3	2	0.102
											1	0	2	5	3	3	0.066				1	2	0	5	4	1	0.166				-2	-2	4	5	1	4	0.005
										7540.98	-2	-2	9	5	0	5	0.368	0.369		7541.61	-2	-2	9	5	1	5	0.434	0.452		7975.03	-2	-2	9	5	4	2	0.687	0.688
											-2	-2	9	5	0	5	0.368				-2	-2	9	5	1	5	0.434				-2	-2	9	5	4	2	0.687
											-2	-2	11	5	1	5	0.183				-2	-2	11	5	0	5	0.242				-2	-2	11	5	3	2	0.156
											1	0	2	5	5	1	0.081				-2	-2	3	5	0	5	0.05				-2	-2	10	5	3	2	0.023
										7544.3	1	0	2	5	5	1	0.344	0.356		7587.12	-2	-2	8	5	5	1	0.903	0.903		8148.97	-2	-2	5	5	2	4	0.104	0.12
											1	0	2	5	5	1	0.344				-2	-2	8	5	5	1	0.903				-2	-2	5	5	2	4	0.104
											1	2	0	5	5	1	0.253				1	0	2	5	4	1	0.035				-2	-2	10	5	3	2	0.039
											-2	-2	8	5	4	1	0.148				-2	-2	5	5	5	1	0.003				-2	-2	5	5	4	2	0.016
										7611.88	-2	-2	10	5	1	5	0.622	0.692		7607.51	-2	-2	10	5	0	5	0.682	0.699
											-2	-2	10	5	1	5	0.622				-2	-2	10	5	0	5	0.682
											-2	-2	11	5	1	5	0.1				-2	-2	11	5	0	5	0.109
											-2	-2	10	5	3	3	0.07				-2	-2	10	5	2	3	0.018
										7748.35	-2	-2	11	5	1	5	0.455	0.529		7745.86	-2	-2	11	5	0	5	0.51	0.539
											-2	-2	11	5	1	5	0.455				-2	-2	11	5	0	5	0.51
											-2	-2	9	5	0	5	0.164				-2	-2	9	5	1	5	0.173
											-2	-2	10	5	1	5	0.079				-2	-2	10	5	0	5	0.088
										7808.29	-2	-2	9	5	2	3	0.676	0.715		7817.11	-2	-2	11	5	2	3	0.407	0.431
											-2	-2	9	5	2	3	0.676				-2	-2	9	5	3	3	0.419
											-2	-2	11	5	3	3	0.128				-2	-2	11	5	2	3	0.407
											-2	-2	11	5	1	5	0.035				-2	-2	10	5	2	3	0.047
										7938.04	-2	-2	10	5	3	3	0.429	0.437		7818.01	-2	-2	10	5	2	3	0.794	0.811
											-2	-2	10	5	3	3	0.429				-2	-2	10	5	2	3	0.794
											-2	-2	11	5	3	3	0.224				-2	-2	11	5	2	3	0.106
											-2	-2	5	5	0	5	0.029				-2	-2	10	5	4	1	0.012
										7941.06	-2	-2	11	5	3	3	0.389	0.424		7886.77	-2	-2	11	5	2	3	0.413	0.461
											-2	-2	11	5	3	3	0.389				-2	-2	11	5	2	3	0.413
											-2	-2	10	5	3	3	0.221				-2	-2	9	5	3	3	0.362
											-2	-2	9	5	2	3	0.191				-2	-2	10	5	2	3	0.061
										7973.86	-2	-2	9	5	4	1	0.752	0.755		7971.43	-2	-2	5	5	1	5	0.164	0.164
											-2	-2	9	5	4	1	0.752				-2	-2	5	5	1	5	0.164
											-2	-2	11	5	3	3	0.096				-2	-2	10	5	0	5	0.037
											-2	-2	11	5	5	1	0.019				-2	-2	6	5	1	5	0.017
										7979.72	-2	-2	10	5	3	3	0.139	0.21		8044	-2	-2	6	5	1	5	0.078	0.078
											-2	-2	10	5	3	3	0.139				-2	-2	6	5	1	5	0.078
											-2	-2	5	5	0	5	0.127				-2	-2	7	5	0	5	0.068
											-2	-2	10	5	1	5	0.07				-2	-2	10	5	0	5	0.018
										8045.57	-2	-2	6	5	0	5	0.07	0.075		8059.2	-2	-2	11	5	4	1	0.702	0.709
											-2	-2	7	5	1	5	0.073				-2	-2	11	5	4	1	0.702
											-2	-2	6	5	0	5	0.07				-2	-2	10	5	4	1	0.106
											-2	-2	10	5	1	5	0.027				-2	-2	9	5	5	1	0.067

## Sheet: J=6
A1 symmetry										A2 symmetry										B1 symmetry										B2 symmetry
Erovib	n1	n2	n3	J	Ka	Kc	RRD^2	FullVib		Erovib	n1	n2	n3	J	Ka	Kc	RRD^2	FullVib		Erovib	n1	n2	n3	J	Ka	Kc	RRD^2	FullVib		Erovib	n1	n2	n3	J	Ka	Kc	RRD^2	FullVib
630.26	0	0	0	6	0	6	0.874	0.874		774.98	0	0	0	6	1	5	0.833	0.92		779.88	0	0	0	6	2	5	0.915	0.915		630.44	0	0	0	6	1	6	0.774	0.873
	0	0	0	6	0	6	0.874				0	0	0	6	1	5	0.833				0	0	0	6	2	5	0.915				0	0	0	6	1	6	0.774
	0	0	1	6	1	6	0.103				0	0	0	6	3	3	0.087				0	0	1	6	1	5	0.06				0	0	1	6	0	6	0.114
	0	0	1	6	3	4	0.011				0	0	1	6	2	5	0.072				0	0	1	6	3	3	0.017				0	0	0	6	3	4	0.099
869.39	0	0	0	6	2	4	0.961	0.962		937.17	0	0	0	6	3	3	0.862	0.972		1032.88	0	0	0	6	4	3	0.955	0.955		905.36	0	0	0	6	3	4	0.847	0.943
	0	0	0	6	2	4	0.961				0	0	0	6	3	3	0.862				0	0	0	6	4	3	0.955				0	0	0	6	3	4	0.847
	0	0	1	6	3	4	0.022				0	0	0	6	1	5	0.11				0	0	1	6	3	3	0.033				0	0	0	6	1	6	0.096
	0	0	1	6	1	6	0.009				0	0	1	6	4	3	0.012				0	0	1	6	5	1	0.006				0	0	1	6	2	4	0.043
1036.97	0	0	0	6	4	2	0.961	0.961		1186.55	0	0	0	6	5	1	0.96	0.961		1373.58	0	0	0	6	6	1	0.967	0.968		1186.38	0	0	0	6	5	2	0.96	0.96
	0	0	0	6	4	2	0.961				0	0	0	6	5	1	0.96				0	0	0	6	6	1	0.967				0	0	0	6	5	2	0.96
	0	0	1	6	3	4	0.023				0	0	1	6	4	3	0.029				0	0	1	6	5	1	0.02				0	0	1	6	4	2	0.029
	0	0	1	6	5	2	0.006				1	0	0	6	5	1	0.004				1	0	0	6	6	1	0.008				1	0	0	6	5	2	0.004
1373.59	0	0	0	6	6	0	0.967	0.968		2676.67	0	1	0	6	1	5	0.613	0.687		2679.94	0	1	0	6	2	5	0.664	0.664		2502.64	0	1	0	6	1	6	0.512	0.575
	0	0	0	6	6	0	0.967				0	1	0	6	1	5	0.613				0	1	0	6	2	5	0.664				0	1	0	6	1	6	0.512
	0	0	1	6	5	2	0.02				0	0	1	6	2	5	0.206				0	0	1	6	1	5	0.187				0	0	1	6	0	6	0.243
	1	0	0	6	6	0	0.008				0	1	0	6	3	3	0.074				0	0	1	6	3	3	0.038				0	0	2	6	1	6	0.064
2502.55	0	1	0	6	0	6	0.576	0.576		2848.46	0	1	0	6	3	3	0.355	0.663		2892.32	0	0	1	6	1	5	0.313	0.463		2759.47	0	0	1	6	0	6	0.346	0.362
	0	1	0	6	0	6	0.576				0	1	0	6	3	3	0.355				0	0	1	6	1	5	0.313				0	0	1	6	0	6	0.346
	0	0	1	6	1	6	0.217				0	1	0	6	1	5	0.308				0	1	0	6	2	5	0.235				0	1	0	6	1	6	0.181
	0	0	2	6	0	6	0.069				0	0	1	6	2	5	0.211				0	0	1	6	3	3	0.149				0	1	0	6	3	4	0.172
2754.63	0	1	0	6	0	6	0.254	0.427		2932.2	0	1	0	6	3	3	0.501	0.521		2967.51	0	1	0	6	4	3	0.457	0.477		2832.35	0	1	0	6	3	4	0.505	0.667
	0	0	1	6	1	6	0.318				0	1	0	6	3	3	0.501				0	1	0	6	4	3	0.457				0	1	0	6	3	4	0.505
	0	1	0	6	0	6	0.254				0	0	1	6	2	5	0.32				0	0	1	6	1	5	0.255				0	0	1	6	2	4	0.2
	0	1	0	6	2	4	0.173				0	0	2	6	1	5	0.05				0	0	1	6	3	3	0.209				0	1	0	6	1	6	0.162
2807.04	0	1	0	6	2	4	0.689	0.746		3072.8	0	0	1	6	4	3	0.664	0.674		3081.71	0	0	1	6	3	3	0.442	0.516		2998.84	0	0	1	6	2	4	0.615	0.622
	0	1	0	6	2	4	0.689				0	0	1	6	4	3	0.664				0	0	1	6	3	3	0.442				0	0	1	6	2	4	0.615
	0	0	1	6	3	4	0.12				0	1	0	6	5	1	0.201				0	1	0	6	4	3	0.403				0	1	0	6	3	4	0.201
	0	1	0	6	0	6	0.057				0	0	2	6	3	3	0.046				0	0	1	6	1	5	0.073				0	0	2	6	3	4	0.045
2942.27	0	1	0	6	4	2	0.424	0.478		3215.34	0	1	0	6	5	1	0.754	0.759		3226.31	0	0	1	6	5	1	0.822	0.832		3080.75	0	0	1	6	4	2	0.675	0.726
	0	1	0	6	4	2	0.424				0	1	0	6	5	1	0.754				0	0	1	6	5	1	0.822				0	0	1	6	4	2	0.675
	0	0	1	6	3	4	0.389				0	0	1	6	4	3	0.177				0	1	0	6	6	1	0.063				0	1	0	6	5	2	0.202
	0	1	0	6	2	4	0.054				0	1	1	6	4	3	0.028				0	0	2	6	4	3	0.049				0	0	1	6	2	4	0.051
3063.1	0	1	0	6	4	2	0.528	0.57		3407.92	0	0	1	6	6	1	0.934	0.936		3409.01	0	1	0	6	6	1	0.897	0.898		3216.33	0	1	0	6	5	2	0.74	0.745
	0	1	0	6	4	2	0.528				0	0	1	6	6	1	0.934				0	1	0	6	6	1	0.897				0	1	0	6	5	2	0.74
	0	0	1	6	3	4	0.294				0	0	2	6	5	1	0.04				0	0	1	6	5	1	0.06				0	0	1	6	4	2	0.193
	0	1	0	6	2	4	0.041				-2	-2	2	6	6	1	0.005				0	1	1	6	5	1	0.018				0	1	1	6	4	2	0.027
3225.9	0	0	1	6	5	2	0.823	0.828		3502.44	1	0	0	6	1	5	0.825	0.913		3507.13	1	0	0	6	2	5	0.907	0.908		3360.4	1	0	0	6	1	6	0.766	0.864
	0	0	1	6	5	2	0.823				1	0	0	6	1	5	0.825				1	0	0	6	2	5	0.907				1	0	0	6	1	6	0.766
	0	1	0	6	6	0	0.063				1	0	0	6	3	3	0.088				-2	-2	2	6	1	5	0.061				-2	-2	2	6	0	6	0.115
	0	0	2	6	4	2	0.051				-2	-2	2	6	2	5	0.073				-2	-2	2	6	3	3	0.017				1	0	0	6	3	4	0.098
3360.23	1	0	0	6	0	6	0.864	0.864		3661.35	1	0	0	6	3	3	0.852	0.966		3753.63	1	0	0	6	4	3	0.944	0.944		3407.93	0	0	1	6	6	0	0.934	0.936
	1	0	0	6	0	6	0.864				1	0	0	6	3	3	0.852				1	0	0	6	4	3	0.944				0	0	1	6	6	0	0.934
	-2	-2	2	6	1	6	0.105				1	0	0	6	1	5	0.114				-2	-2	2	6	3	3	0.034				0	0	2	6	5	2	0.04
	-2	-2	2	6	3	4	0.011				-2	-2	2	6	4	3	0.012				-2	-2	2	6	5	1	0.007				-2	-2	2	6	6	0	0.005
3409.01	0	1	0	6	6	0	0.897	0.898		3901.85	1	0	0	6	5	1	0.945	0.946		4080.98	1	0	0	6	6	1	0.949	0.949		3629.8	1	0	0	6	3	4	0.842	0.935
	0	1	0	6	6	0	0.897				1	0	0	6	5	1	0.945				1	0	0	6	6	1	0.949				1	0	0	6	3	4	0.842
	0	0	1	6	5	2	0.06				-2	-2	2	6	4	3	0.031				-2	-2	2	6	5	1	0.022				1	0	0	6	1	6	0.093
	0	1	1	6	5	2	0.018				-2	-2	3	6	5	1	0.008				-2	-2	3	6	6	1	0.016				-2	-2	2	6	2	4	0.044
3595.24	1	0	0	6	2	4	0.956	0.957		4521.02	0	2	0	6	1	5	0.668	0.71		4528.36	0	2	0	6	2	5	0.673	0.675		3901.67	1	0	0	6	5	2	0.945	0.945
	1	0	0	6	2	4	0.956				0	2	0	6	1	5	0.668				0	2	0	6	2	5	0.673				1	0	0	6	5	2	0.945
	-2	-2	2	6	3	4	0.023				0	1	1	6	2	5	0.157				0	1	1	6	1	5	0.156				-2	-2	2	6	4	2	0.03
	-2	-2	2	6	1	6	0.01				0	0	2	6	1	5	0.048				0	0	2	6	2	5	0.058				-2	-2	3	6	5	2	0.008
3757.76	1	0	0	6	4	2	0.951	0.951		4677.25	0	2	0	6	1	5	0.227	0.411		4698.41	0	0	2	6	2	5	0.293	0.298		4341.03	0	2	0	6	1	6	0.465	0.532
	1	0	0	6	4	2	0.951				0	2	0	6	1	5	0.227				0	0	2	6	2	5	0.293				0	2	0	6	1	6	0.465
	-2	-2	2	6	3	4	0.024				0	2	0	6	3	3	0.184				0	2	0	6	2	5	0.17				0	1	1	6	0	6	0.229
	-2	-2	2	6	5	2	0.006				0	1	1	6	2	5	0.173				-2	-2	5	6	1	5	0.102				0	0	2	6	1	6	0.075
4080.98	1	0	0	6	6	0	0.949	0.949		4739.93	0	2	0	6	3	3	0.638	0.642		4845.17	0	2	0	6	4	3	0.731	0.734		4515.76	0	2	0	6	1	6	0.195	0.259
	1	0	0	6	6	0	0.949				0	2	0	6	3	3	0.638				0	2	0	6	4	3	0.731				0	2	0	6	1	6	0.195
	-2	-2	2	6	5	2	0.021				0	0	2	6	1	5	0.135				0	1	1	6	3	3	0.13				-2	-2	5	6	0	6	0.191
	-2	-2	3	6	6	0	0.016				-2	-2	5	6	2	5	0.089				0	0	2	6	2	5	0.031				0	0	2	6	1	6	0.19
4340.79	0	2	0	6	0	6	0.533	0.534		4940.45	0	1	1	6	4	3	0.254	0.427		4933.21	0	1	1	6	1	5	0.514	0.574		4685.13	0	2	0	6	3	4	0.662	0.761
	0	2	0	6	0	6	0.533				0	0	2	6	3	3	0.323				0	1	1	6	1	5	0.514				0	2	0	6	3	4	0.662
	0	1	1	6	1	6	0.202				0	1	1	6	4	3	0.254				0	0	2	6	4	3	0.078				0	1	1	6	2	4	0.13
	0	0	2	6	0	6	0.085				0	1	1	6	2	5	0.172				0	0	2	6	2	5	0.074				0	2	0	6	1	6	0.097
4514.88	0	2	0	6	0	6	0.247	0.265		4982.9	0	1	1	6	2	5	0.246	0.311		5018.55	0	0	2	6	4	3	0.356	0.486		4824.79	0	1	1	6	0	6	0.252	0.391
	0	2	0	6	0	6	0.247				0	0	2	6	1	5	0.28				0	0	2	6	4	3	0.356				0	1	1	6	0	6	0.252
	0	0	2	6	0	6	0.198				0	1	1	6	2	5	0.246				0	0	2	6	2	5	0.13				0	1	1	6	2	4	0.12
	-2	-2	5	6	1	6	0.169				0	2	0	6	5	1	0.093				0	1	1	6	3	3	0.126				0	0	2	6	1	6	0.113
4634.15	0	2	0	6	2	4	0.852	0.864		5042.69	0	2	0	6	5	1	0.538	0.542		5071.39	0	1	1	6	3	3	0.451	0.555		4873.72	0	0	2	6	3	4	0.306	0.321
	0	2	0	6	2	4	0.852				0	2	0	6	5	1	0.538				0	1	1	6	3	3	0.451				0	0	2	6	3	4	0.306
	0	1	1	6	3	4	0.033				0	0	2	6	3	3	0.155				0	0	2	6	4	3	0.209				0	1	1	6	0	6	0.119
	0	0	2	6	2	4	0.018				0	0	2	6	1	5	0.095				0	2	0	6	4	3	0.091				0	1	1	6	2	4	0.082
4808.2	0	1	1	6	3	4	0.359	0.363		5161.31	0	0	2	6	5	1	0.486	0.652		5231.27	0	1	1	6	5	1	0.468	0.469		4994.87	0	1	1	6	2	4	0.489	0.734
	0	1	1	6	3	4	0.359				0	0	2	6	5	1	0.486				0	1	1	6	5	1	0.468				0	1	1	6	2	4	0.489
	0	2	0	6	4	2	0.274				0	0	2	6	3	3	0.147				0	2	0	6	6	1	0.33				0	1	1	6	4	2	0.245
	0	0	2	6	2	4	0.17				0	1	1	6	4	3	0.127				0	0	2	6	4	3	0.072				0	0	2	6	3	4	0.073
4839.74	0	1	1	6	1	6	0.272	0.283		5202.98	0	1	1	6	4	3	0.339	0.371		5318.17	0	0	2	6	6	1	0.491	0.53		5030.38	0	2	0	6	5	2	0.583	0.585
	0	1	1	6	1	6	0.272				0	1	1	6	4	3	0.339				0	0	2	6	6	1	0.491				0	2	0	6	5	2	0.583
	0	2	0	6	4	2	0.202				0	0	2	6	5	1	0.253				0	2	0	6	6	1	0.229				0	1	1	6	4	2	0.12
	-2	-2	7	6	0	6	0.105				0	2	0	6	5	1	0.217				0	1	1	6	5	1	0.147				0	0	2	6	3	4	0.104
4896.48	0	2	0	6	4	2	0.356	0.4		5322.88	-2	-2	1	6	1	5	0.446	0.514		5324.37	-2	-2	1	6	2	5	0.491	0.491		5144.52	-2	-2	1	6	1	6	0.374	0.418
	0	2	0	6	4	2	0.356				-2	-2	1	6	1	5	0.446				-2	-2	1	6	2	5	0.491				-2	-2	1	6	1	6	0.374
	0	0	2	6	2	4	0.266				-2	-2	2	6	2	5	0.322				-2	-2	2	6	1	5	0.282				-2	-2	2	6	0	6	0.32
	-2	-2	5	6	3	4	0.075				-2	-2	1	6	3	3	0.068				-2	-2	2	6	3	3	0.058				1	0	2	6	1	6	0.056
5050.98	0	0	2	6	4	2	0.627	0.699		5450.82	0	1	1	6	6	1	0.877	0.877		5387.16	0	0	2	6	6	1	0.395	0.397		5154.94	0	0	2	6	5	2	0.46	0.561
	0	0	2	6	4	2	0.627				0	1	1	6	6	1	0.877				0	0	2	6	6	1	0.395				0	0	2	6	5	2	0.46
	0	1	1	6	5	2	0.135				0	0	2	6	5	1	0.047				0	2	0	6	6	1	0.381				0	1	1	6	4	2	0.14
	0	0	2	6	2	4	0.07				-2	-2	7	6	5	1	0.038				0	1	1	6	5	1	0.146				0	2	0	6	5	2	0.103
5076.8	0	1	1	6	3	4	0.381	0.429		5487.83	-2	-2	1	6	1	5	0.485	0.581		5513.03	-2	-2	1	6	2	5	0.408	0.45		5202.69	0	1	1	6	4	2	0.32	0.358
	0	1	1	6	3	4	0.381				-2	-2	1	6	1	5	0.485				-2	-2	1	6	2	5	0.408				0	1	1	6	4	2	0.32
	0	0	2	6	2	4	0.268				-2	-2	2	6	2	5	0.243				-2	-2	2	6	1	5	0.233				0	0	2	6	5	2	0.288
	0	2	0	6	4	2	0.107				-2	-2	1	6	3	3	0.095				-2	-2	2	6	3	3	0.104				0	2	0	6	5	2	0.209
5144.68	-2	-2	1	6	0	6	0.424	0.424		5573.51	-2	-2	1	6	3	3	0.727	0.728		5588.43	-2	-2	2	6	3	3	0.42	0.687		5383.32	-2	-2	1	6	1	6	0.329	0.469
	-2	-2	1	6	0	6	0.424				-2	-2	1	6	3	3	0.727				-2	-2	2	6	3	3	0.42				-2	-2	1	6	1	6	0.329
	-2	-2	2	6	1	6	0.285				-2	-2	2	6	2	5	0.134				-2	-2	2	6	1	5	0.26				-2	-2	2	6	0	6	0.242
	1	0	2	6	0	6	0.06				-2	-2	2	6	4	3	0.035				-2	-2	1	6	4	3	0.228				-2	-2	1	6	3	4	0.14
5232.03	0	1	1	6	5	2	0.46	0.461		5675.66	-2	-2	2	6	4	3	0.696	0.705		5713.26	-2	-2	1	6	4	3	0.658	0.663		5450.84	0	1	1	6	6	0	0.877	0.877
	0	1	1	6	5	2	0.46				-2	-2	2	6	4	3	0.696				-2	-2	1	6	4	3	0.658				0	1	1	6	6	0	0.877
	0	2	0	6	6	0	0.332				-2	-2	1	6	5	1	0.092				-2	-2	2	6	3	3	0.221				0	0	2	6	5	2	0.047
	0	0	2	6	4	2	0.081				-2	-2	1	6	3	3	0.051				-2	-2	8	6	3	3	0.033				-2	-2	7	6	5	2	0.038
5318.38	0	0	2	6	6	0	0.492	0.535		5864.35	-2	-2	1	6	5	1	0.841	0.844		5814.7	-2	-2	2	6	5	1	0.809	0.818		5473.38	-2	-2	1	6	3	4	0.372	0.482
	0	0	2	6	6	0	0.492				-2	-2	1	6	5	1	0.841				-2	-2	2	6	5	1	0.809				-2	-2	2	6	2	4	0.373
	0	2	0	6	6	0	0.226				-2	-2	2	6	4	3	0.077				1	0	2	6	4	3	0.036				-2	-2	1	6	3	4	0.372
	0	1	1	6	5	2	0.148				-2	-2	8	6	4	3	0.03				-2	-2	1	6	6	1	0.031				-2	-2	1	6	1	6	0.109
5380.96	-2	-2	1	6	0	6	0.402	0.451		5982.34	-2	-2	2	6	6	1	0.909	0.911		6059.76	-2	-2	1	6	6	1	0.903	0.904		5615.42	-2	-2	1	6	3	4	0.378	0.443
	-2	-2	1	6	0	6	0.402				-2	-2	2	6	6	1	0.909				-2	-2	1	6	6	1	0.903				-2	-2	2	6	2	4	0.43
	-2	-2	2	6	1	6	0.227				1	0	2	6	5	1	0.028				-2	-2	2	6	5	1	0.029				-2	-2	1	6	3	4	0.378
	1	0	2	6	0	6	0.074				1	2	0	6	5	1	0.017				-2	-2	8	6	5	1	0.019				-2	-2	1	6	1	6	0.057
5387.61	0	0	2	6	6	0	0.366	0.369		6140.36	-2	-2	3	6	1	5	0.806	0.901		6144.5	-2	-2	3	6	2	5	0.894	0.894		5681.89	-2	-2	2	6	4	2	0.751	0.795
	0	0	2	6	6	0	0.366				-2	-2	3	6	1	5	0.806				-2	-2	3	6	2	5	0.894				-2	-2	2	6	4	2	0.751
	0	2	0	6	6	0	0.355				-2	-2	3	6	3	3	0.094				-2	-2	9	6	1	5	0.064				-2	-2	1	6	5	2	0.09
	0	1	1	6	5	2	0.138				-2	-2	9	6	2	5	0.077				-2	-2	9	6	3	3	0.019				-2	-2	2	6	2	4	0.043
5459.63	-2	-2	1	6	2	4	0.672	0.696		6264.96	-2	-2	4	6	1	5	0.788	0.805		6280.79	-2	-2	4	6	2	5	0.762	0.768		5864.72	-2	-2	1	6	5	2	0.836	0.84
	-2	-2	1	6	2	4	0.672				-2	-2	4	6	1	5	0.788				-2	-2	4	6	2	5	0.762				-2	-2	1	6	5	2	0.836
	-2	-2	2	6	3	4	0.213				-2	-2	6	6	2	5	0.063				-2	-2	6	6	1	5	0.071				-2	-2	2	6	4	2	0.082
	-2	-2	1	6	0	6	0.024				-2	-2	5	6	2	5	0.048				-2	-2	5	6	1	5	0.055				-2	-2	8	6	4	2	0.029
5566.63	-2	-2	2	6	3	4	0.418	0.453		6297.24	-2	-2	3	6	3	3	0.834	0.959		6384.35	-2	-2	3	6	4	3	0.93	0.931		5982.34	-2	-2	2	6	6	0	0.908	0.91
	-2	-2	2	6	3	4	0.418				-2	-2	3	6	3	3	0.834				-2	-2	3	6	4	3	0.93				-2	-2	2	6	6	0	0.908
	-2	-2	1	6	4	2	0.211				-2	-2	3	6	1	5	0.124				-2	-2	9	6	3	3	0.036				1	0	2	6	5	2	0.028
	-2	-2	1	6	2	4	0.196				-2	-2	9	6	4	3	0.013				-2	-2	9	6	5	1	0.007				1	2	0	6	5	2	0.017
5704.8	-2	-2	1	6	4	2	0.719	0.752		6454.45	-2	-2	4	6	3	3	0.699	0.784		6543.31	-2	-2	6	6	1	5	0.174	0.266		5999.18	-2	-2	3	6	1	6	0.751	0.844
	-2	-2	1	6	4	2	0.719				-2	-2	4	6	3	3	0.699				-2	-2	7	6	2	5	0.257				-2	-2	3	6	1	6	0.751
	-2	-2	2	6	3	4	0.131				-2	-2	4	6	1	5	0.082				-2	-2	6	6	1	5	0.174				-2	-2	9	6	0	6	0.119
	-2	-2	1	6	2	4	0.033				-2	-2	6	6	2	5	0.064				-2	-2	6	6	3	3	0.092				-2	-2	3	6	3	4	0.093
5814.39	-2	-2	2	6	5	2	0.807	0.812		6526.29	-2	-2	3	6	5	1	0.929	0.93		6588.48	-2	-2	5	6	1	5	0.168	0.317		6092.08	-2	-2	4	6	1	6	0.562	0.663
	-2	-2	2	6	5	2	0.807				-2	-2	3	6	5	1	0.929				-2	-2	4	6	4	3	0.289				-2	-2	4	6	1	6	0.562
	1	0	2	6	4	2	0.037				-2	-2	9	6	4	3	0.033				-2	-2	5	6	1	5	0.168				-2	-2	6	6	0	6	0.118
	-2	-2	1	6	6	0	0.031				1	0	0	6	5	1	0.007				-2	-2	5	6	3	3	0.149				-2	-2	4	6	3	4	0.101
5999.02	-2	-2	3	6	0	6	0.845	0.845		6551.41	-2	-2	7	6	1	5	0.156	0.222		6661.37	-2	-2	4	6	4	3	0.439	0.513		6264.68	-2	-2	3	6	3	4	0.837	0.923
	-2	-2	3	6	0	6	0.845				-2	-2	6	6	2	5	0.197				-2	-2	4	6	4	3	0.439				-2	-2	3	6	3	4	0.837
	-2	-2	9	6	1	6	0.109				-2	-2	7	6	1	5	0.156				-2	-2	5	6	1	5	0.191				-2	-2	3	6	1	6	0.086
	-2	-2	9	6	3	4	0.011				-2	-2	7	6	3	3	0.066				-2	-2	4	6	2	5	0.073				-2	-2	9	6	2	4	0.046
6059.76	-2	-2	1	6	6	0	0.903	0.904		6629.34	-2	-2	5	6	2	5	0.325	0.327		6696.87	-2	-2	3	6	6	1	0.931	0.932		6322.89	-2	-2	7	6	1	6	0.171	0.181
	-2	-2	1	6	6	0	0.903				-2	-2	5	6	2	5	0.325				-2	-2	3	6	6	1	0.931				-2	-2	7	6	1	6	0.171
	-2	-2	2	6	5	2	0.029				-2	-2	4	6	3	3	0.151				-2	-2	9	6	5	1	0.023				-2	-2	6	6	0	6	0.151
	-2	-2	8	6	5	2	0.019				-2	-2	7	6	1	5	0.074				1	0	0	6	6	1	0.013				0	0	2	6	1	6	0.126
6091.32	-2	-2	4	6	0	6	0.661	0.666		6792.95	-2	-2	5	6	4	3	0.387	0.404		6802.79	-2	-2	5	6	3	3	0.394	0.611		6420.97	-2	-2	4	6	3	4	0.465	0.467
	-2	-2	4	6	0	6	0.661				-2	-2	5	6	4	3	0.387				-2	-2	5	6	3	3	0.394				-2	-2	4	6	3	4	0.465
	-2	-2	6	6	1	6	0.101				-2	-2	4	6	5	1	0.274				-2	-2	5	6	1	5	0.214				-2	-2	5	6	0	6	0.136
	-2	-2	5	6	1	6	0.061				-2	-2	7	6	3	3	0.082				-2	-2	4	6	4	3	0.097				0	0	2	6	1	6	0.058
6232.88	-2	-2	3	6	2	4	0.948	0.948		6880.13	-2	-2	6	6	4	3	0.229	0.233		6878.8	-2	-2	6	6	3	3	0.273	0.478		6475.75	-2	-2	4	6	1	6	0.25	0.498
	-2	-2	3	6	2	4	0.948				-2	-2	6	6	4	3	0.229				-2	-2	7	6	4	3	0.279				-2	-2	4	6	1	6	0.25
	-2	-2	9	6	3	4	0.024				-2	-2	5	6	4	3	0.168				-2	-2	6	6	3	3	0.273				-2	-2	4	6	3	4	0.244
	-2	-2	9	6	1	6	0.01				-2	-2	4	6	5	1	0.104				-2	-2	6	6	1	5	0.176				-2	-2	5	6	0	6	0.11
6321.03	-2	-2	7	6	0	6	0.175	0.178		6918.83	-2	-2	4	6	5	1	0.461	0.467		6952.67	-2	-2	5	6	5	1	0.569	0.589		6526.1	-2	-2	3	6	5	2	0.929	0.93
	-2	-2	7	6	0	6	0.175				-2	-2	4	6	5	1	0.461				-2	-2	5	6	5	1	0.569				-2	-2	3	6	5	2	0.929
	-2	-2	6	6	1	6	0.152				-2	-2	7	6	3	3	0.271				-2	-2	6	6	3	3	0.063				-2	-2	9	6	4	2	0.033
	0	0	2	6	0	6	0.111				-2	-2	6	6	4	3	0.043				-2	-2	7	6	4	3	0.062				1	0	0	6	5	2	0.007
6364.35	-2	-2	4	6	2	4	0.753	0.771		6976.68	-2	-2	7	6	1	5	0.307	0.332		6997.03	-2	-2	7	6	2	5	0.249	0.27		6723.1	-2	-2	5	6	2	4	0.312	0.374
	-2	-2	4	6	2	4	0.753				-2	-2	7	6	1	5	0.307				-2	-2	7	6	2	5	0.249				-2	-2	5	6	2	4	0.312
	-2	-2	5	6	1	6	0.056				-2	-2	6	6	2	5	0.235				-2	-2	6	6	1	5	0.171				-2	-2	6	6	2	4	0.128
	0	0	2	6	0	6	0.028				-2	-2	6	6	4	3	0.054				-2	-2	5	6	3	3	0.117				-2	-2	4	6	3	4	0.077
6388.82	-2	-2	3	6	4	2	0.938	0.939		7105.87	-2	-2	7	6	3	3	0.256	0.453		7075.78	-2	-2	6	6	5	1	0.343	0.587		6731.46	-2	-2	7	6	3	4	0.236	0.247
	-2	-2	3	6	4	2	0.938				-2	-2	7	6	3	3	0.256				-2	-2	6	6	5	1	0.343				-2	-2	7	6	3	4	0.236
	-2	-2	9	6	3	4	0.025				-2	-2	7	6	5	1	0.186				-2	-2	6	6	3	3	0.215				-2	-2	5	6	2	4	0.179
	-2	-2	9	6	5	2	0.007				-2	-2	6	6	4	3	0.155				-2	-2	7	6	4	3	0.126				-2	-2	6	6	2	4	0.17
6455.55	-2	-2	4	6	0	6	0.146	0.233		7117.12	1	0	2	6	1	5	0.355	0.404		7120.9	1	0	2	6	2	5	0.409	0.409		6815.83	-2	-2	5	6	4	2	0.38	0.453
	-2	-2	5	6	1	6	0.189				1	0	2	6	1	5	0.355				1	0	2	6	2	5	0.409				-2	-2	5	6	4	2	0.38
	-2	-2	4	6	0	6	0.146				-2	-2	8	6	2	5	0.237				-2	-2	8	6	1	5	0.212				-2	-2	4	6	5	2	0.26
	0	0	2	6	0	6	0.075				1	2	0	6	1	5	0.142				1	2	0	6	2	5	0.124				-2	-2	6	6	2	4	0.093
6610.93	-2	-2	4	6	4	2	0.647	0.651		7129.22	-2	-2	5	6	6	1	0.55	0.572		7137.48	-2	-2	4	6	6	1	0.631	0.631		6858.96	-2	-2	6	6	0	6	0.168	0.179
	-2	-2	4	6	4	2	0.647				-2	-2	5	6	6	1	0.55				-2	-2	4	6	6	1	0.631				-2	-2	6	6	0	6	0.168
	-2	-2	5	6	3	4	0.133				-2	-2	7	6	5	1	0.084				-2	-2	7	6	4	3	0.119				-2	-2	7	6	1	6	0.145
	-2	-2	6	6	3	4	0.1				-2	-2	6	6	4	3	0.079				-2	-2	6	6	5	1	0.066				-2	-2	5	6	2	4	0.084
6696.87	-2	-2	3	6	6	0	0.931	0.932		7196.06	1	2	0	6	1	5	0.464	0.487		7203.01	1	2	0	6	2	5	0.531	0.533		6906.89	-2	-2	4	6	5	2	0.437	0.44
	-2	-2	3	6	6	0	0.931				1	2	0	6	1	5	0.464				1	2	0	6	2	5	0.531				-2	-2	4	6	5	2	0.437
	-2	-2	9	6	5	2	0.023				-2	-2	2	6	2	5	0.083				-2	-2	2	6	1	5	0.053				-2	-2	5	6	4	2	0.152
	1	0	0	6	6	0	0.013				1	0	2	6	3	3	0.041				-2	-2	2	6	3	3	0.045				-2	-2	7	6	3	4	0.085
6735.04	-2	-2	5	6	3	4	0.228	0.228		7220.62	-2	-2	6	6	6	1	0.193	0.338		7262.36	-2	-2	6	6	5	1	0.288	0.306		6917.93	1	0	2	6	1	6	0.27	0.316
	-2	-2	5	6	3	4	0.228				-2	-2	7	6	5	1	0.319				-2	-2	6	6	5	1	0.288				1	0	2	6	1	6	0.27
	-2	-2	6	6	3	4	0.17				-2	-2	6	6	6	1	0.193				-2	-2	4	6	6	1	0.186				-2	-2	8	6	0	6	0.24
	-2	-2	7	6	2	4	0.12				-2	-2	6	6	4	3	0.145				-2	-2	7	6	4	3	0.142				1	2	0	6	1	6	0.049
6761.72	-2	-2	4	6	4	2	0.229	0.272		7327.1	1	2	0	6	3	3	0.605	0.654		7387.04	-2	-2	7	6	6	1	0.745	0.745		6986.12	-2	-2	6	6	4	2	0.352	0.609
	-2	-2	4	6	4	2	0.229				1	2	0	6	3	3	0.605				-2	-2	7	6	6	1	0.745				-2	-2	6	6	4	2	0.352
	-2	-2	5	6	3	4	0.192				1	0	2	6	3	3	0.106				-2	-2	6	6	5	1	0.069				-2	-2	6	6	2	4	0.254
	-2	-2	7	6	2	4	0.186				1	0	2	6	1	5	0.064				1	2	0	6	4	3	0.033				-2	-2	7	6	5	2	0.087
6859.89	-2	-2	7	6	0	6	0.171	0.208		7416.4	-2	-2	6	6	6	1	0.557	0.557		7436.22	1	2	0	6	4	3	0.467	0.469		7038.73	1	2	0	6	1	6	0.414	0.477
	-2	-2	7	6	0	6	0.171				-2	-2	6	6	6	1	0.557				1	2	0	6	4	3	0.467				1	2	0	6	1	6	0.414
	-2	-2	6	6	1	6	0.151				-2	-2	5	6	6	1	0.137				-2	-2	8	6	3	3	0.196				-2	-2	2	6	0	6	0.096
	-2	-2	5	6	1	6	0.064				-2	-2	7	6	5	1	0.099				1	0	2	6	4	3	0.108				1	2	0	6	3	4	0.063
6916.74	1	0	2	6	0	6	0.344	0.344		7436.55	1	0	2	6	3	3	0.342	0.473		7457.08	-2	-2	8	6	1	5	0.321	0.435		7110.82	-2	-2	7	6	3	4	0.208	0.375
	1	0	2	6	0	6	0.344				1	0	2	6	3	3	0.342				-2	-2	8	6	1	5	0.321				-2	-2	7	6	3	4	0.208
	-2	-2	8	6	1	6	0.231				-2	-2	8	6	4	3	0.13				1	0	2	6	4	3	0.259				-2	-2	7	6	5	2	0.144
	1	2	0	6	0	6	0.057				1	0	2	6	1	5	0.121				-2	-2	8	6	3	3	0.088				-2	-2	5	6	4	2	0.114
6947.73	-2	-2	5	6	5	2	0.548	0.554		7500.8	-2	-2	8	6	2	5	0.41	0.414		7501.91	1	0	2	6	2	5	0.153	0.29		7129.49	-2	-2	5	6	6	0	0.571	0.596
	-2	-2	5	6	5	2	0.548				-2	-2	8	6	2	5	0.41				-2	-2	8	6	1	5	0.25				-2	-2	5	6	6	0	0.571
	-2	-2	7	6	4	2	0.171				1	0	2	6	1	5	0.171				1	2	0	6	4	3	0.185				-2	-2	7	6	5	2	0.087
	-2	-2	4	6	6	0	0.032				1	2	0	6	3	3	0.125				1	0	2	6	2	5	0.153				-2	-2	6	6	4	2	0.076
7004.07	-2	-2	7	6	2	4	0.324	0.549		7594.36	1	2	0	6	5	1	0.543	0.544		7617.12	-2	-2	8	6	3	3	0.475	0.531		7219.27	-2	-2	7	6	5	2	0.352	0.354
	-2	-2	7	6	2	4	0.324				1	2	0	6	5	1	0.543				-2	-2	8	6	3	3	0.475				-2	-2	7	6	5	2	0.352
	-2	-2	7	6	4	2	0.22				-2	-2	8	6	4	3	0.243				1	0	2	6	4	3	0.191				-2	-2	6	6	6	0	0.208
	-2	-2	6	6	3	4	0.068				-2	-2	6	6	6	1	0.02				1	2	0	6	4	3	0.129				-2	-2	6	6	4	2	0.133
7039.08	1	2	0	6	0	6	0.447	0.449		7625.43	1	0	2	6	5	1	0.451	0.584		7756.86	1	2	0	6	6	1	0.49	0.492		7285.8	1	0	2	6	3	4	0.333	0.342
	1	2	0	6	0	6	0.447				1	0	2	6	5	1	0.451				1	2	0	6	6	1	0.49				1	0	2	6	3	4	0.333
	-2	-2	2	6	1	6	0.09				-2	-2	8	6	4	3	0.176				1	0	2	6	6	1	0.268				1	2	0	6	3	4	0.283
	-2	-2	6	6	1	6	0.038				1	0	2	6	3	3	0.12				-2	-2	8	6	5	1	0.108				-2	-2	8	6	2	4	0.204
7072.43	-2	-2	6	6	5	2	0.261	0.505		7760.73	1	0	2	6	5	1	0.284	0.304		7785.04	-2	-2	8	6	5	1	0.574	0.574		7331.77	1	2	0	6	3	4	0.278	0.279
	-2	-2	6	6	5	2	0.261				1	0	2	6	5	1	0.284				-2	-2	8	6	5	1	0.574				1	2	0	6	3	4	0.278
	-2	-2	6	6	3	4	0.206				1	2	0	6	5	1	0.282				1	0	2	6	6	1	0.206				-2	-2	8	6	0	6	0.111
	-2	-2	7	6	2	4	0.091				-2	-2	8	6	4	3	0.277				1	0	2	6	4	3	0.064				1	0	2	6	3	4	0.098
7136.92	-2	-2	4	6	6	0	0.653	0.654		7863.88	-2	-2	9	6	2	5	0.431	0.431		7863.98	-2	-2	9	6	1	5	0.365	0.443		7377.58	-2	-2	8	6	0	6	0.252	0.261
	-2	-2	4	6	6	0	0.653				-2	-2	9	6	2	5	0.431				-2	-2	9	6	1	5	0.365				-2	-2	8	6	0	6	0.252
	-2	-2	7	6	4	2	0.115				-2	-2	11	6	1	5	0.228				-2	-2	11	6	2	5	0.266				1	2	0	6	3	4	0.118
	-2	-2	6	6	5	2	0.08				-2	-2	11	6	3	3	0.048				-2	-2	9	6	3	3	0.078				1	2	0	6	1	6	0.109
7242.87	1	2	0	6	2	4	0.534	0.538		7907.03	-2	-2	10	6	1	5	0.736	0.737		7937.71	-2	-2	10	6	2	5	0.692	0.705		7418.93	-2	-2	6	6	6	0	0.636	0.641
	1	2	0	6	2	4	0.534				-2	-2	10	6	1	5	0.736				-2	-2	10	6	2	5	0.692				-2	-2	6	6	6	0	0.636
	1	0	2	6	2	4	0.256				-2	-2	11	6	1	5	0.115				-2	-2	11	6	2	5	0.111				-2	-2	5	6	6	0	0.14
	-2	-2	8	6	3	4	0.047				-2	-2	4	6	3	3	0.007				-2	-2	10	6	4	3	0.013				-2	-2	7	6	5	2	0.104
7260.82	-2	-2	6	6	5	2	0.273	0.284		7976.85	-2	-2	8	6	6	1	0.874	0.874		7960.24	1	0	2	6	6	1	0.398	0.402		7536.53	-2	-2	8	6	2	4	0.573	0.658
	-2	-2	6	6	5	2	0.273				-2	-2	8	6	6	1	0.874				1	0	2	6	6	1	0.398				-2	-2	8	6	2	4	0.573
	-2	-2	4	6	6	0	0.189				1	0	2	6	5	1	0.03				1	2	0	6	6	1	0.394				1	0	2	6	3	4	0.107
	-2	-2	7	6	4	2	0.14				0	1	1	6	6	1	0.005				-2	-2	8	6	5	1	0.103				-2	-2	8	6	4	2	0.085
7323.09	1	0	2	6	2	4	0.241	0.285		8038.09	-2	-2	11	6	1	5	0.557	0.566		8055.91	-2	-2	11	6	2	5	0.487	0.513		7594.09	1	2	0	6	5	2	0.501	0.502
	1	0	2	6	2	4	0.241				-2	-2	11	6	1	5	0.557				-2	-2	11	6	2	5	0.487				1	2	0	6	5	2	0.501
	-2	-2	8	6	3	4	0.199				-2	-2	9	6	2	5	0.152				-2	-2	9	6	1	5	0.099				-2	-2	8	6	4	2	0.327
	1	2	0	6	2	4	0.175				-2	-2	10	6	1	5	0.091				-2	-2	9	6	3	3	0.095				-2	-2	6	6	6	0	0.015
7370.33	-2	-2	8	6	1	6	0.298	0.312		8122.55	-2	-2	10	6	3	3	0.654	0.675		8109.93	-2	-2	9	6	3	3	0.478	0.776		7620.06	1	0	2	6	5	2	0.455	0.547
	-2	-2	8	6	1	6	0.298				-2	-2	10	6	3	3	0.654				-2	-2	9	6	3	3	0.478				1	0	2	6	5	2	0.455
	1	0	2	6	0	6	0.159				-2	-2	11	6	3	3	0.148				-2	-2	9	6	1	5	0.291				-2	-2	8	6	4	2	0.132
	1	2	0	6	2	4	0.086				-2	-2	10	6	1	5	0.014				-2	-2	11	6	4	3	0.087				1	0	2	6	3	4	0.082
7388.04	-2	-2	7	6	6	0	0.738	0.739		8134.19	-2	-2	11	6	3	3	0.528	0.53		8270.23	-2	-2	11	6	4	3	0.658	0.659		7681.47	-2	-2	9	6	0	6	0.368	0.368
	-2	-2	7	6	6	0	0.738				-2	-2	11	6	3	3	0.528				-2	-2	11	6	4	3	0.658				-2	-2	9	6	0	6	0.368
	-2	-2	6	6	5	2	0.078				-2	-2	9	6	4	3	0.163				-2	-2	9	6	3	3	0.112				-2	-2	11	6	1	6	0.214
	-2	-2	4	6	6	0	0.025				-2	-2	10	6	3	3	0.131				-2	-2	10	6	4	3	0.066				-2	-2	3	6	1	6	0.067
7447.2	1	2	0	6	4	2	0.593	0.597		8189.81	-2	-2	9	6	4	3	0.559	0.565		8285.86	-2	-2	10	6	4	3	0.333	0.348		7743.82	-2	-2	10	6	1	6	0.515	0.63
	1	2	0	6	4	2	0.593				-2	-2	9	6	4	3	0.559				-2	-2	10	6	4	3	0.333				-2	-2	10	6	1	6	0.515
	-2	-2	8	6	3	4	0.128				-2	-2	11	6	3	3	0.177				-2	-2	5	6	1	5	0.033				-2	-2	10	6	3	4	0.115
	1	0	2	6	4	2	0.041				-2	-2	11	6	5	1	0.042				-2	-2	5	6	3	3	0.028				-2	-2	11	6	1	6	0.083
7517.89	1	0	2	6	4	2	0.527	0.675		8320.58	-2	-2	5	6	2	5	0.131	0.156		8314.24	-2	-2	9	6	5	1	0.736	0.743		7760.71	1	0	2	6	5	2	0.291	0.308
	1	0	2	6	4	2	0.527				-2	-2	5	6	2	5	0.131				-2	-2	9	6	5	1	0.736				1	0	2	6	5	2	0.291
	1	0	2	6	2	4	0.146				-2	-2	10	6	3	3	0.053				-2	-2	11	6	4	3	0.065				1	2	0	6	5	2	0.279
	1	2	0	6	4	2	0.068				-2	-2	5	6	4	3	0.024				-2	-2	3	6	6	1	0.021				-2	-2	8	6	4	2	0.275
7613.76	-2	-2	8	6	3	4	0.385	0.454		8386.56	-2	-2	6	6	2	5	0.07	0.084		8349.41	-2	-2	10	6	4	3	0.327	0.345		7924.42	-2	-2	11	6	1	6	0.373	0.485
	-2	-2	8	6	3	4	0.385				-2	-2	6	6	2	5	0.07				-2	-2	10	6	4	3	0.327				-2	-2	11	6	1	6	0.373
	1	2	0	6	4	2	0.156				-2	-2	7	6	3	3	0.038				-2	-2	5	6	3	3	0.053				-2	-2	9	6	0	6	0.124
	1	0	2	6	4	2	0.104				-2	-2	7	6	1	5	0.033				-2	-2	11	6	4	3	0.046				-2	-2	11	6	3	4	0.112
7681.64	-2	-2	9	6	1	6	0.328	0.366		8425.83	-2	-2	11	6	5	1	0.717	0.72		8391.45	-2	-2	10	6	4	3	0.069	0.093		7976.82	-2	-2	8	6	6	0	0.872	0.872
	-2	-2	9	6	1	6	0.328				-2	-2	11	6	5	1	0.717				-2	-2	10	6	4	3	0.069				-2	-2	8	6	6	0	0.872
	-2	-2	11	6	0	6	0.237				-2	-2	10	6	5	1	0.106				-2	-2	7	6	2	5	0.054				1	0	2	6	5	2	0.029
	-2	-2	3	6	0	6	0.065				-2	-2	9	6	4	3	0.042				-2	-2	6	6	3	3	0.036				0	1	1	6	6	0	0.005
7741.69	-2	-2	10	6	0	6	0.62	0.633																						8009.88	-2	-2	9	6	2	4	0.525	0.562
	-2	-2	10	6	0	6	0.62																								-2	-2	9	6	2	4	0.525
	-2	-2	11	6	0	6	0.101																								-2	-2	11	6	3	4	0.175
	-2	-2	10	6	2	4	0.013																								-2	-2	11	6	1	6	0.063
7756.88	1	2	0	6	6	0	0.491	0.493																						8089.43	-2	-2	10	6	3	4	0.33	0.336
	1	2	0	6	6	0	0.491																								-2	-2	10	6	3	4	0.33
	1	0	2	6	6	0	0.27																								-2	-2	5	6	0	6	0.085
	-2	-2	8	6	5	2	0.106																								-2	-2	11	6	3	4	0.067
7785.48	-2	-2	8	6	5	2	0.574	0.574																						8123.73	-2	-2	10	6	3	4	0.144	0.181
	-2	-2	8	6	5	2	0.574																								-2	-2	10	6	3	4	0.144
	1	0	2	6	6	0	0.205																								-2	-2	5	6	0	6	0.086
	1	0	2	6	4	2	0.068																								-2	-2	6	6	0	6	0.072
7923.24	-2	-2	11	6	0	6	0.469	0.488																						8151.68	-2	-2	10	6	3	4	0.199	0.336
	-2	-2	11	6	0	6	0.469																								-2	-2	10	6	3	4	0.199
	-2	-2	9	6	1	6	0.134																								-2	-2	10	6	1	6	0.133
	-2	-2	10	6	0	6	0.091																								-2	-2	7	6	1	6	0.051
7960.31	1	0	2	6	6	0	0.397	0.4																						8162.58	-2	-2	11	6	3	4	0.474	0.575
	1	0	2	6	6	0	0.397																								-2	-2	11	6	3	4	0.474
	1	2	0	6	6	0	0.394																								-2	-2	9	6	2	4	0.222
	-2	-2	8	6	5	2	0.104																								-2	-2	11	6	1	6	0.097
8001.83	-2	-2	10	6	2	4	0.693	0.727																						8190.78	-2	-2	9	6	4	2	0.743	0.793
	-2	-2	10	6	2	4	0.693																								-2	-2	9	6	4	2	0.743
	-2	-2	11	6	2	4	0.13																								-2	-2	9	6	2	4	0.048
	-2	-2	10	6	4	2	0.033																								-2	-2	11	6	5	2	0.043
8011.19	-2	-2	9	6	3	4	0.405	0.411																						8315.97	-2	-2	7	6	1	6	0.073	0.076
	-2	-2	9	6	3	4	0.405																								-2	-2	7	6	1	6	0.073
	-2	-2	11	6	2	4	0.331																								-2	-2	10	6	1	6	0.072
	-2	-2	10	6	2	4	0.073																								-2	-2	4	6	1	6	0.034
8105.94	-2	-2	11	6	2	4	0.406	0.491
	-2	-2	11	6	2	4	0.406
	-2	-2	9	6	3	4	0.247
	-2	-2	11	6	4	2	0.086
8110.47	-2	-2	5	6	1	6	0.181	0.184
	-2	-2	5	6	1	6	0.181
	-2	-2	10	6	0	6	0.033
	0	0	2	6	0	6	0.031
8142.15	-2	-2	6	6	1	6	0.084	0.085
	-2	-2	6	6	1	6	0.084
	-2	-2	7	6	0	6	0.08
	-2	-2	10	6	0	6	0.035
8265.6	-2	-2	11	6	4	2	0.641	0.662
	-2	-2	11	6	4	2	0.641
	-2	-2	10	6	4	2	0.092
	-2	-2	9	6	5	2	0.068
8313.83	-2	-2	9	6	5	2	0.555	0.561
	-2	-2	9	6	5	2	0.555
	-2	-2	10	6	4	2	0.065
	-2	-2	11	6	4	2	0.022
8315.86	-2	-2	9	6	5	2	0.166	0.167
	-2	-2	9	6	5	2	0.166
	-2	-2	10	6	4	2	0.134
	-2	-2	11	6	4	2	0.116

## Sheet: J=7
A1 symmetry										A2 symmetry										B1 symmetry										B2 symmetry
Erovib	n1	n2	n3	J	Ka	Kc	RRD^2	FullVib		Erovib	n1	n2	n3	J	Ka	Kc	RRD^2	FullVib		Erovib	n1	n2	n3	J	Ka	Kc	RRD^2	FullVib		Erovib	n1	n2	n3	J	Ka	Kc	RRD^2	FullVib
1000.66	0	0	0	7	2	6	0.879	0.879		825.41	0	0	0	7	1	7	0.692	0.831		825.35	0	0	0	7	0	7	0.831	0.831		998.66	0	0	0	7	1	6	0.755	0.882
	0	0	0	7	2	6	0.879				0	0	0	7	1	7	0.692				0	0	0	7	0	7	0.831				0	0	0	7	1	6	0.755
	0	0	1	7	1	6	0.082				0	0	1	7	0	7	0.148				0	0	1	7	1	7	0.125				0	0	0	7	3	4	0.126
	0	0	1	7	3	4	0.024				0	0	0	7	3	5	0.139				0	0	1	7	3	5	0.022				0	0	1	7	2	6	0.104
1279.48	0	0	0	7	4	4	0.934	0.934		1145.05	0	0	0	7	3	5	0.776	0.916		1123.7	0	0	0	7	2	5	0.932	0.933		1203.1	0	0	0	7	3	4	0.799	0.96
	0	0	0	7	4	4	0.934				0	0	0	7	3	5	0.776				0	0	0	7	2	5	0.932				0	0	0	7	3	4	0.799
	0	0	1	7	3	4	0.046				0	0	0	7	1	7	0.138				0	0	1	7	3	5	0.038				0	0	0	7	1	6	0.161
	0	0	1	7	5	2	0.01				0	0	1	7	2	5	0.066				0	0	1	7	1	7	0.017				0	0	1	7	4	4	0.02
1615.06	0	0	0	7	6	2	0.943	0.943		1431.4	0	0	0	7	5	3	0.938	0.94		1291.96	0	0	0	7	4	3	0.951	0.951		1432.33	0	0	0	7	5	2	0.939	0.941
	0	0	0	7	6	2	0.943				0	0	0	7	5	3	0.938				0	0	0	7	4	3	0.951				0	0	0	7	5	2	0.939
	0	0	1	7	5	2	0.04				0	0	1	7	4	3	0.042				0	0	1	7	3	5	0.024				0	0	1	7	4	4	0.042
	1	0	0	7	6	2	0.008				0	0	1	7	6	1	0.006				0	0	1	7	5	3	0.009				0	0	1	7	6	2	0.006
2879.24	0	1	0	7	2	6	0.608	0.608		1832.16	0	0	0	7	7	1	0.951	0.951		1615.09	0	0	0	7	6	1	0.943	0.943		1832.16	0	0	0	7	7	0	0.951	0.951
	0	1	0	7	2	6	0.608				0	0	0	7	7	1	0.951				0	0	0	7	6	1	0.943				0	0	0	7	7	0	0.951
	0	0	1	7	1	6	0.185				0	0	1	7	6	1	0.027				0	0	1	7	5	3	0.04				0	0	1	7	6	2	0.027
	0	0	2	7	2	6	0.058				1	0	0	7	7	1	0.014				1	0	0	7	6	1	0.008				1	0	0	7	7	0	0.014
3119.45	0	1	0	7	2	6	0.243	0.36		2673.02	0	1	0	7	1	7	0.437	0.523		2672.99	0	1	0	7	0	7	0.523	0.523		2877.97	0	1	0	7	1	6	0.522	0.617
	0	1	0	7	2	6	0.243				0	1	0	7	1	7	0.437				0	1	0	7	0	7	0.523				0	1	0	7	1	6	0.522
	0	0	1	7	1	6	0.204				0	0	1	7	0	7	0.231				0	0	1	7	1	7	0.193				0	0	1	7	2	6	0.222
	0	0	1	7	3	4	0.154				0	1	0	7	3	5	0.085				0	0	2	7	0	7	0.093				0	1	0	7	3	4	0.095
3210.63	0	1	0	7	4	4	0.51	0.544		2964.46	0	1	0	7	3	5	0.184	0.357		2962.86	0	1	0	7	0	7	0.296	0.375		3091.11	0	1	0	7	1	6	0.381	0.595
	0	1	0	7	4	4	0.51				0	0	1	7	0	7	0.268				0	1	0	7	0	7	0.296				0	1	0	7	1	6	0.381
	0	0	1	7	1	6	0.242				0	1	0	7	3	5	0.184				0	0	1	7	1	7	0.263				0	1	0	7	3	4	0.213
	0	0	1	7	3	4	0.111				0	1	0	7	1	7	0.172				0	0	2	7	0	7	0.145				0	0	1	7	2	6	0.201
3352.2	0	0	1	7	3	4	0.441	0.566		3054.92	0	1	0	7	3	5	0.45	0.647		3039.68	0	1	0	7	2	5	0.695	0.724		3172.28	0	1	0	7	3	4	0.586	0.591
	0	0	1	7	3	4	0.441				0	1	0	7	3	5	0.45				0	1	0	7	2	5	0.695				0	1	0	7	3	4	0.586
	0	1	0	7	4	4	0.302				0	0	1	7	2	5	0.199				0	0	1	7	3	5	0.16				0	0	1	7	2	6	0.216
	0	0	1	7	1	6	0.123				0	1	0	7	1	7	0.195				0	1	1	7	1	7	0.032				0	0	2	7	1	6	0.05
3465.27	0	0	1	7	5	2	0.698	0.74		3251.46	0	0	1	7	2	5	0.459	0.495		3183.08	0	1	0	7	4	3	0.477	0.553		3310.04	0	0	1	7	4	4	0.538	0.553
	0	0	1	7	5	2	0.698				0	0	1	7	2	5	0.459				0	1	0	7	4	3	0.477				0	0	1	7	4	4	0.538
	0	1	0	7	6	2	0.124				0	1	0	7	3	5	0.178				0	0	1	7	3	5	0.276				0	1	0	7	5	2	0.276
	0	0	2	7	4	4	0.055				0	0	2	7	3	5	0.078				0	1	0	7	2	5	0.076				0	0	2	7	3	4	0.052
3654.39	0	1	0	7	6	2	0.809	0.812		3334.41	0	0	1	7	4	3	0.529	0.659		3313.21	0	1	0	7	4	3	0.458	0.536		3466.35	0	1	0	7	5	2	0.654	0.664
	0	1	0	7	6	2	0.809				0	0	1	7	4	3	0.529				0	1	0	7	4	3	0.458				0	1	0	7	5	2	0.654
	0	0	1	7	5	2	0.11				0	1	0	7	5	3	0.264				0	0	1	7	3	5	0.261				0	0	1	7	4	4	0.223
	0	1	1	7	5	2	0.038				0	0	1	7	2	5	0.128				0	1	0	7	2	5	0.076				0	1	1	7	4	4	0.045
3725.73	1	0	0	7	2	6	0.867	0.867		3470.96	0	1	0	7	5	3	0.604	0.614		3462.6	0	0	1	7	5	3	0.707	0.718		3640.43	0	0	1	7	6	2	0.806	0.813
	1	0	0	7	2	6	0.867				0	1	0	7	5	3	0.604				0	0	1	7	5	3	0.707				0	0	1	7	6	2	0.806
	-2	-2	2	7	1	6	0.083				0	0	1	7	4	3	0.282				0	1	0	7	6	1	0.125				0	0	2	7	5	2	0.07
	-2	-2	2	7	3	4	0.025				0	1	1	7	4	3	0.041				0	0	2	7	4	3	0.065				0	1	0	7	7	0	0.04
3850.35	0	0	1	7	7	0	0.91	0.912		3553.42	1	0	0	7	1	7	0.68	0.818		3553.33	1	0	0	7	0	7	0.818	0.818		3723.76	1	0	0	7	1	6	0.746	0.871
	0	0	1	7	7	0	0.91				1	0	0	7	1	7	0.68				1	0	0	7	0	7	0.818				1	0	0	7	1	6	0.746
	0	0	2	7	6	2	0.052				-2	-2	2	7	0	7	0.149				-2	-2	2	7	1	7	0.127				1	0	0	7	3	4	0.125
	-2	-2	2	7	7	0	0.009				1	0	0	7	3	5	0.137				-2	-2	2	7	3	5	0.022				-2	-2	2	7	2	6	0.105
3998.09	1	0	0	7	4	4	0.918	0.919		3640.53	0	0	1	7	6	1	0.807	0.814		3654.31	0	1	0	7	6	1	0.811	0.814		3882.91	0	1	0	7	7	0	0.896	0.897
	1	0	0	7	4	4	0.918				0	0	1	7	6	1	0.807				0	1	0	7	6	1	0.811				0	1	0	7	7	0	0.896
	-2	-2	2	7	3	4	0.047				0	0	2	7	5	3	0.07				0	0	1	7	5	3	0.108				0	0	1	7	6	2	0.04
	-2	-2	2	7	5	2	0.01				0	1	0	7	7	1	0.04				0	1	1	7	5	3	0.038				0	1	1	7	6	2	0.024
4321.67	1	0	0	7	6	2	0.916	0.916		3866.97	1	0	0	7	3	5	0.765	0.899		3846.34	1	0	0	7	2	5	0.894	0.896		3924.27	1	0	0	7	3	4	0.787	0.951
	1	0	0	7	6	2	0.916				1	0	0	7	3	5	0.765				1	0	0	7	2	5	0.894				1	0	0	7	3	4	0.787
	-2	-2	2	7	5	2	0.042				1	0	0	7	1	7	0.132				-2	-2	2	7	3	5	0.038				1	0	0	7	1	6	0.164
	-2	-2	3	7	6	2	0.017				-2	-2	2	7	2	5	0.067				0	0	1	7	7	1	0.028				-2	-2	2	7	4	4	0.021
4717.09	0	2	0	7	2	6	0.577	0.578		3883.05	0	1	0	7	7	1	0.891	0.891		3850.48	0	0	1	7	7	1	0.882	0.883		4146.08	1	0	0	7	5	2	0.918	0.92
	0	2	0	7	2	6	0.577				0	1	0	7	7	1	0.891				0	0	1	7	7	1	0.882				1	0	0	7	5	2	0.918
	0	1	1	7	1	6	0.175				0	0	1	7	6	1	0.041				0	0	2	7	6	1	0.051				-2	-2	2	7	4	4	0.044
	0	0	2	7	2	6	0.078				0	1	1	7	6	1	0.024				1	0	0	7	2	5	0.029				-2	-2	3	7	5	2	0.009
4896.31	0	2	0	7	2	6	0.213	0.241		4145.14	1	0	0	7	5	3	0.917	0.918		4010.5	1	0	0	7	4	3	0.937	0.938		4528.66	1	0	0	7	7	0	0.919	0.92
	0	2	0	7	2	6	0.213				1	0	0	7	5	3	0.917				1	0	0	7	4	3	0.937				1	0	0	7	7	0	0.919
	0	0	2	7	2	6	0.202				-2	-2	2	7	4	3	0.043				-2	-2	2	7	3	5	0.024				-2	-2	2	7	6	2	0.029
	-2	-2	5	7	1	6	0.131				-2	-2	3	7	5	3	0.009				-2	-2	2	7	5	3	0.01				-2	-2	3	7	7	0	0.028
5065.21	0	2	0	7	4	4	0.701	0.706		4497.04	0	2	0	7	1	7	0.363	0.443		4321.7	1	0	0	7	6	1	0.916	0.916		4714.08	0	2	0	7	1	6	0.531	0.595
	0	2	0	7	4	4	0.701				0	2	0	7	1	7	0.363				1	0	0	7	6	1	0.916				0	2	0	7	1	6	0.531
	0	1	1	7	3	4	0.12				0	1	1	7	0	7	0.238				-2	-2	2	7	5	3	0.042				0	1	1	7	2	6	0.2
	0	0	2	7	2	6	0.028				0	2	0	7	3	5	0.08				-2	-2	3	7	6	1	0.017				0	0	2	7	1	6	0.064
5174.53	0	1	1	7	1	6	0.422	0.476		4528.66	1	0	0	7	7	1	0.919	0.92		4496.96	0	2	0	7	0	7	0.443	0.443		4885.48	0	2	0	7	1	6	0.286	0.322
	0	1	1	7	1	6	0.422				1	0	0	7	7	1	0.919				0	2	0	7	0	7	0.443				0	2	0	7	1	6	0.286
	0	0	2	7	4	4	0.115				-2	-2	2	7	6	1	0.029				0	1	1	7	1	7	0.196				-2	-2	5	7	2	6	0.127
	0	2	0	7	2	6	0.059				-2	-2	3	7	7	1	0.028				0	0	2	7	0	7	0.094				0	1	1	7	2	6	0.115
5263.7	0	0	2	7	4	4	0.268	0.388		4688.7	0	2	0	7	1	7	0.205	0.291		4688.35	0	2	0	7	0	7	0.283	0.293		4969.57	0	2	0	7	3	4	0.72	0.758
	0	0	2	7	4	4	0.268				-2	-2	5	7	0	7	0.225				0	2	0	7	0	7	0.283				0	2	0	7	3	4	0.72
	0	0	2	7	2	6	0.118				0	2	0	7	1	7	0.205				-2	-2	5	7	1	7	0.19				-2	-2	5	7	2	6	0.064
	0	2	0	7	4	4	0.091				0	0	1	7	0	7	0.165				0	0	1	7	1	7	0.161				0	0	2	7	1	6	0.064
5333.9	0	1	1	7	3	4	0.475	0.634		4896.67	0	2	0	7	3	5	0.564	0.694		4864.02	0	2	0	7	2	5	0.771	0.788		5172.73	0	1	1	7	4	4	0.293	0.446
	0	1	1	7	3	4	0.475				0	2	0	7	3	5	0.564				0	2	0	7	2	5	0.771				0	1	1	7	4	4	0.293
	0	0	2	7	4	4	0.11				0	1	1	7	2	5	0.153				0	1	1	7	3	5	0.057				0	0	2	7	3	4	0.201
	0	1	1	7	5	2	0.099				0	2	0	7	1	7	0.124				0	0	2	7	2	5	0.033				0	1	1	7	2	6	0.152
5449.75	0	2	0	7	6	2	0.422	0.423		5036.17	0	1	1	7	0	7	0.212	0.32		5022.47	0	1	1	7	3	5	0.318	0.324		5218.18	0	2	0	7	5	2	0.256	0.319
	0	2	0	7	6	2	0.422				0	1	1	7	0	7	0.212				0	1	1	7	3	5	0.318				0	2	0	7	5	2	0.256
	0	1	1	7	5	2	0.312				0	1	1	7	2	5	0.091				0	2	0	7	4	3	0.22				0	1	1	7	2	6	0.178
	0	0	2	7	4	4	0.078				0	0	2	7	1	7	0.086				0	0	2	7	2	5	0.143				0	0	2	7	1	6	0.12
5520.03	-2	-2	1	7	2	6	0.459	0.459		5094.96	0	0	2	7	3	5	0.234	0.238		5055.29	0	2	0	7	4	3	0.247	0.33		5289.95	0	2	0	7	5	2	0.373	0.394
	-2	-2	1	7	2	6	0.459				0	0	2	7	3	5	0.234				0	2	0	7	4	3	0.247				0	2	0	7	5	2	0.373
	-2	-2	2	7	1	6	0.247				0	2	0	7	1	7	0.092				0	1	1	7	1	7	0.213				0	0	2	7	1	6	0.186
	-2	-2	2	7	3	4	0.057				0	1	1	7	0	7	0.09				-2	-2	7	7	0	7	0.12				0	0	2	7	3	4	0.135
5562.05	0	0	2	7	6	2	0.558	0.63		5246.21	0	2	0	7	5	3	0.515	0.533		5128.37	0	2	0	7	4	3	0.353	0.422		5419.87	0	0	2	7	5	2	0.55	0.74
	0	0	2	7	6	2	0.558				0	2	0	7	5	3	0.515				0	2	0	7	4	3	0.353				0	0	2	7	5	2	0.55
	0	0	2	7	4	4	0.072				0	1	1	7	4	3	0.301				0	0	2	7	2	5	0.195				0	0	2	7	3	4	0.153
	0	2	0	7	6	2	0.065				0	1	1	7	2	5	0.05				-2	-2	5	7	3	5	0.098				0	1	1	7	6	2	0.089
5632.28	0	2	0	7	6	2	0.42	0.427		5265.59	0	1	1	7	2	5	0.405	0.476		5299.22	0	0	2	7	4	3	0.363	0.376		5459.75	0	1	1	7	4	4	0.418	0.433
	0	2	0	7	6	2	0.42				0	1	1	7	2	5	0.405				0	0	2	7	4	3	0.363				0	1	1	7	4	4	0.418
	0	1	1	7	5	2	0.268				0	0	2	7	3	5	0.105				0	1	1	7	5	3	0.183				0	2	0	7	5	2	0.229
	0	0	2	7	6	2	0.143				0	2	0	7	5	3	0.097				0	1	1	7	3	5	0.13				0	0	2	7	3	4	0.091
5741.82	-2	-2	1	7	2	6	0.389	0.452		5312.11	-2	-2	1	7	1	7	0.324	0.387		5312.35	-2	-2	1	7	0	7	0.36	0.36		5519.54	-2	-2	1	7	1	6	0.387	0.468
	-2	-2	1	7	2	6	0.389				-2	-2	1	7	1	7	0.324				-2	-2	1	7	0	7	0.36				-2	-2	1	7	1	6	0.387
	-2	-2	2	7	1	6	0.149				-2	-2	2	7	0	7	0.271				-2	-2	2	7	1	7	0.203				-2	-2	2	7	2	6	0.296
	-2	-2	2	7	3	4	0.11				1	0	2	7	1	7	0.063				1	0	2	7	0	7	0.065				-2	-2	1	7	3	4	0.08
5837.91	-2	-2	2	7	3	4	0.26	0.533		5405.13	0	0	2	7	5	3	0.499	0.602		5351.78	0	0	2	7	2	5	0.291	0.396		5667.58	0	1	1	7	6	2	0.58	0.58
	-2	-2	1	7	4	4	0.329				0	0	2	7	5	3	0.499				0	0	2	7	2	5	0.291				0	1	1	7	6	2	0.58
	-2	-2	2	7	3	4	0.26				0	0	2	7	3	5	0.083				0	1	1	7	3	5	0.213				0	2	0	7	7	0	0.174
	-2	-2	2	7	1	6	0.258				0	1	1	7	6	1	0.065				0	0	2	7	4	3	0.104				0	0	2	7	5	2	0.062
5907.22	0	1	1	7	7	0	0.858	0.858		5454.78	0	1	1	7	4	3	0.408	0.459		5454.45	0	2	0	7	6	1	0.417	0.417		5725.72	-2	-2	1	7	1	6	0.5	0.545
	0	1	1	7	7	0	0.858				0	1	1	7	4	3	0.408				0	2	0	7	6	1	0.417				-2	-2	1	7	1	6	0.5
	-2	-2	7	7	6	2	0.05				0	2	0	7	5	3	0.228				0	1	1	7	5	3	0.276				-2	-2	2	7	2	6	0.196
	0	0	2	7	6	2	0.037				0	0	2	7	5	3	0.092				0	0	2	7	4	3	0.124				1	0	2	7	1	6	0.058
5972.47	-2	-2	1	7	4	4	0.514	0.52		5587.86	-2	-2	1	7	1	7	0.289	0.456		5563.39	0	0	2	7	6	1	0.56	0.647		5757.3	0	0	2	7	7	0	0.653	0.677
	-2	-2	1	7	4	4	0.514				-2	-2	1	7	1	7	0.289				0	0	2	7	6	1	0.56				0	0	2	7	7	0	0.653
	-2	-2	2	7	3	4	0.279				-2	-2	2	7	0	7	0.178				0	0	2	7	4	3	0.087				0	2	0	7	7	0	0.132
	-2	-2	2	7	1	6	0.07				-2	-2	1	7	3	5	0.167				0	1	1	7	5	3	0.061				0	1	1	7	6	2	0.055
6059.39	-2	-2	2	7	5	2	0.691	0.732		5667.44	0	1	1	7	6	1	0.58	0.58		5586.74	-2	-2	1	7	0	7	0.425	0.459		5814.93	-2	-2	1	7	3	4	0.715	0.718
	-2	-2	2	7	5	2	0.691				0	1	1	7	6	1	0.58				-2	-2	1	7	0	7	0.425				-2	-2	1	7	3	4	0.715
	-2	-2	1	7	6	2	0.067				0	2	0	7	7	1	0.174				-2	-2	2	7	1	7	0.177				-2	-2	2	7	2	6	0.095
	1	0	2	7	4	4	0.042				0	0	2	7	5	3	0.06				1	0	2	7	0	7	0.094				-2	-2	2	7	4	4	0.056
6299.43	-2	-2	1	7	6	2	0.832	0.834		5694.72	-2	-2	1	7	3	5	0.351	0.495		5632.92	0	2	0	7	6	1	0.417	0.424		5861.94	0	2	0	7	7	0	0.599	0.6
	-2	-2	1	7	6	2	0.832				-2	-2	1	7	3	5	0.351				0	2	0	7	6	1	0.417				0	2	0	7	7	0	0.599
	-2	-2	2	7	5	2	0.055				-2	-2	2	7	2	5	0.314				0	1	1	7	5	3	0.271				0	0	2	7	7	0	0.191
	-2	-2	8	7	5	2	0.04				-2	-2	1	7	1	7	0.144				0	0	2	7	6	1	0.136				0	1	1	7	6	2	0.112
6360.2	-2	-2	3	7	2	6	0.847	0.847		5757.31	0	0	2	7	7	1	0.654	0.677		5686.39	-2	-2	1	7	2	5	0.588	0.605		5919.77	-2	-2	2	7	4	4	0.556	0.569
	-2	-2	3	7	2	6	0.847				0	0	2	7	7	1	0.654				-2	-2	1	7	2	5	0.588				-2	-2	2	7	4	4	0.556
	-2	-2	9	7	1	6	0.086				0	2	0	7	7	1	0.133				-2	-2	2	7	3	5	0.246				-2	-2	1	7	5	2	0.145
	-2	-2	9	7	3	4	0.027				0	1	1	7	6	1	0.055				1	2	0	7	2	5	0.031				-2	-2	1	7	3	4	0.071
6415.88	-2	-2	2	7	7	0	0.875	0.877		5860.08	0	2	0	7	7	1	0.48	0.482		5813.54	-2	-2	1	7	4	3	0.282	0.512		6108.09	-2	-2	1	7	5	2	0.758	0.766
	-2	-2	2	7	7	0	0.875				0	2	0	7	7	1	0.48				-2	-2	1	7	4	3	0.282				-2	-2	1	7	5	2	0.758
	1	0	2	7	6	2	0.036				0	0	2	7	7	1	0.15				-2	-2	2	7	3	5	0.273				-2	-2	2	7	4	4	0.109
	1	2	0	7	6	2	0.022				0	1	1	7	6	1	0.082				-2	-2	1	7	2	5	0.229				-2	-2	8	7	4	4	0.047
6466.12	-2	-2	4	7	2	6	0.684	0.692		5869.61	-2	-2	1	7	3	5	0.243	0.334		5907.24	0	1	1	7	7	1	0.857	0.857		6222.06	-2	-2	2	7	6	2	0.764	0.772
	-2	-2	4	7	2	6	0.684				-2	-2	2	7	2	5	0.268				0	1	1	7	7	1	0.857				-2	-2	2	7	6	2	0.764
	-2	-2	6	7	1	6	0.094				-2	-2	1	7	3	5	0.243				-2	-2	7	7	6	1	0.05				1	0	2	7	5	2	0.049
	-2	-2	5	7	1	6	0.056				0	2	0	7	7	1	0.12				0	0	2	7	6	1	0.037				1	0	0	7	7	0	0.03
6626.53	-2	-2	3	7	4	4	0.9	0.901		5940.26	-2	-2	2	7	4	3	0.645	0.753		5950.2	-2	-2	1	7	4	3	0.622	0.691		6358.46	-2	-2	3	7	1	6	0.723	0.852
	-2	-2	3	7	4	4	0.9				-2	-2	2	7	4	3	0.645				-2	-2	1	7	4	3	0.622				-2	-2	3	7	1	6	0.723
	-2	-2	9	7	3	4	0.049				-2	-2	1	7	5	3	0.132				-2	-2	2	7	3	5	0.131				-2	-2	3	7	3	4	0.128
	-2	-2	9	7	5	2	0.011				-2	-2	2	7	2	5	0.106				-2	-2	1	7	2	5	0.068				-2	-2	9	7	2	6	0.11
6713.8	-2	-2	7	7	2	6	0.197	0.202		6110.11	-2	-2	1	7	5	3	0.735	0.745		6057.23	-2	-2	2	7	5	3	0.69	0.701		6457.95	-2	-2	4	7	1	6	0.676	0.714
	-2	-2	7	7	2	6	0.197				-2	-2	1	7	5	3	0.735				-2	-2	2	7	5	3	0.69				-2	-2	4	7	1	6	0.676
	-2	-2	6	7	1	6	0.119				-2	-2	2	7	4	3	0.134				-2	-2	1	7	6	1	0.068				-2	-2	6	7	2	6	0.095
	0	0	2	7	2	6	0.081				-2	-2	8	7	4	3	0.044				1	0	2	7	4	3	0.05				-2	-2	5	7	2	6	0.057
6793.17	-2	-2	4	7	4	4	0.332	0.362		6188.89	-2	-2	3	7	1	7	0.657	0.787		6188.81	-2	-2	3	7	0	7	0.788	0.788		6525	-2	-2	1	7	7	0	0.869	0.869
	-2	-2	4	7	4	4	0.332				-2	-2	3	7	1	7	0.657				-2	-2	3	7	0	7	0.788				-2	-2	1	7	7	0	0.869
	-2	-2	5	7	3	4	0.119				-2	-2	9	7	0	7	0.152				-2	-2	9	7	1	7	0.131				-2	-2	11	7	7	0	0.028
	-2	-2	5	7	1	6	0.09				-2	-2	3	7	3	5	0.129				-2	-2	9	7	3	5	0.022				-2	-2	8	7	6	2	0.025
6880.97	-2	-2	4	7	4	4	0.397	0.491		6222.16	-2	-2	2	7	6	1	0.764	0.772		6245.41	-2	-2	4	7	0	7	0.573	0.576		6557.48	-2	-2	3	7	3	4	0.765	0.94
	-2	-2	4	7	4	4	0.397				-2	-2	2	7	6	1	0.764				-2	-2	4	7	0	7	0.573				-2	-2	3	7	3	4	0.765
	-2	-2	5	7	1	6	0.131				1	0	2	7	5	3	0.048				-2	-2	6	7	1	7	0.115				-2	-2	3	7	1	6	0.175
	-2	-2	4	7	2	6	0.09				1	0	0	7	7	1	0.03				-2	-2	5	7	1	7	0.056				-2	-2	9	7	4	4	0.022
6936.27	-2	-2	3	7	6	2	0.889	0.89		6245.71	-2	-2	4	7	1	7	0.453	0.575		6299.45	-2	-2	1	7	6	1	0.834	0.836		6669.38	-2	-2	4	7	3	4	0.494	0.655
	-2	-2	3	7	6	2	0.889				-2	-2	4	7	1	7	0.453				-2	-2	1	7	6	1	0.834				-2	-2	4	7	3	4	0.494
	-2	-2	9	7	5	2	0.045				-2	-2	6	7	0	7	0.144				-2	-2	2	7	5	3	0.054				-2	-2	4	7	1	6	0.158
	1	0	0	7	6	2	0.014				-2	-2	4	7	3	5	0.121				-2	-2	8	7	5	3	0.039				-2	-2	6	7	2	6	0.097
7061.44	-2	-2	5	7	3	4	0.245	0.469		6463.87	0	0	2	7	1	7	0.141	0.148		6415.86	-2	-2	2	7	7	1	0.875	0.877		6728.89	-2	-2	4	7	3	4	0.174	0.178
	-2	-2	5	7	3	4	0.245				0	0	2	7	1	7	0.141				-2	-2	2	7	7	1	0.875				-2	-2	4	7	3	4	0.174
	-2	-2	5	7	1	6	0.203				-2	-2	7	7	1	7	0.112				1	0	2	7	6	1	0.036				-2	-2	7	7	1	6	0.096
	-2	-2	6	7	1	6	0.083				0	1	1	7	0	7	0.086				1	2	0	7	6	1	0.022				-2	-2	6	7	2	6	0.094
7107.99	-2	-2	6	7	3	4	0.153	0.314		6499.22	-2	-2	3	7	3	5	0.757	0.883		6463.38	0	0	2	7	0	7	0.14	0.146		6768.83	-2	-2	3	7	5	2	0.894	0.899
	-2	-2	7	7	4	4	0.291				-2	-2	3	7	3	5	0.757				0	0	2	7	0	7	0.14				-2	-2	3	7	5	2	0.894
	-2	-2	6	7	3	4	0.153				-2	-2	3	7	1	7	0.125				-2	-2	7	7	0	7	0.122				-2	-2	9	7	4	4	0.046
	-2	-2	6	7	1	6	0.09				-2	-2	9	7	2	5	0.07				0	1	1	7	1	7	0.086				-2	-2	2	7	6	2	0.011
7184.79	-2	-2	5	7	5	2	0.429	0.489		6525.16	-2	-2	1	7	7	1	0.867	0.867		6480.77	-2	-2	3	7	2	5	0.904	0.905		6844.81	-2	-2	4	7	3	4	0.167	0.227
	-2	-2	5	7	5	2	0.429				-2	-2	1	7	7	1	0.867				-2	-2	3	7	2	5	0.904				-2	-2	5	7	2	6	0.209
	-2	-2	6	7	3	4	0.077				-2	-2	11	7	7	1	0.028				-2	-2	9	7	3	5	0.041				-2	-2	4	7	3	4	0.167
	-2	-2	5	7	3	4	0.059				-2	-2	8	7	6	1	0.025				-2	-2	9	7	1	7	0.019				-2	-2	7	7	1	6	0.058
7250.28	-2	-2	6	7	1	6	0.102	0.172		6610.56	-2	-2	4	7	3	5	0.356	0.364		6579.67	-2	-2	4	7	2	5	0.622	0.667		7006.92	-2	-2	4	7	5	2	0.37	0.38
	-2	-2	7	7	2	6	0.161				-2	-2	4	7	3	5	0.356				-2	-2	4	7	2	5	0.622				-2	-2	4	7	5	2	0.37
	-2	-2	5	7	3	4	0.111				-2	-2	5	7	0	7	0.101				-2	-2	5	7	1	7	0.061				-2	-2	5	7	4	4	0.237
	-2	-2	6	7	1	6	0.102				0	0	2	7	1	7	0.07				0	0	2	7	0	7	0.03				-2	-2	6	7	4	4	0.144
7300.03	1	0	2	7	2	6	0.34	0.34		6674.64	-2	-2	4	7	1	7	0.287	0.566		6639.63	-2	-2	3	7	4	3	0.911	0.913		7107.54	-2	-2	5	7	4	4	0.192	0.258
	1	0	2	7	2	6	0.34				-2	-2	4	7	1	7	0.287				-2	-2	3	7	4	3	0.911				-2	-2	5	7	4	4	0.192
	-2	-2	8	7	1	6	0.192				-2	-2	4	7	3	5	0.27				-2	-2	9	7	3	5	0.024				-2	-2	6	7	4	4	0.145
	1	2	0	7	2	6	0.08				-2	-2	6	7	2	5	0.057				-2	-2	9	7	5	3	0.011				0	0	2	7	5	2	0.083
7324.88	-2	-2	6	7	5	2	0.333	0.474		6767.79	-2	-2	3	7	5	3	0.895	0.897		6647.53	-2	-2	4	7	2	5	0.164	0.335		7132.71	-2	-2	3	7	7	0	0.889	0.89
	-2	-2	6	7	5	2	0.333				-2	-2	3	7	5	3	0.895				-2	-2	4	7	2	5	0.164				-2	-2	3	7	7	0	0.889
	-2	-2	4	7	6	2	0.204				-2	-2	9	7	4	3	0.046				-2	-2	4	7	0	7	0.142				-2	-2	9	7	6	2	0.031
	-2	-2	6	7	3	4	0.113				-2	-2	2	7	6	1	0.012				-2	-2	5	7	1	7	0.075				1	0	0	7	7	0	0.023
7366.36	-2	-2	4	7	6	2	0.383	0.384		6924.48	-2	-2	6	7	2	5	0.241	0.295		6817.05	-2	-2	4	7	4	3	0.618	0.626		7149.54	-2	-2	4	7	5	2	0.385	0.397
	-2	-2	4	7	6	2	0.383				-2	-2	6	7	2	5	0.241				-2	-2	4	7	4	3	0.618				-2	-2	4	7	5	2	0.385
	-2	-2	7	7	4	4	0.155				-2	-2	7	7	3	5	0.226				-2	-2	6	7	3	5	0.121				-2	-2	7	7	3	4	0.206
	-2	-2	6	7	3	4	0.096				-2	-2	4	7	5	3	0.07				-2	-2	5	7	3	5	0.088				-2	-2	6	7	4	4	0.07
7414.99	1	2	0	7	2	6	0.457	0.462		6953.18	-2	-2	5	7	2	5	0.298	0.371		6936.24	-2	-2	3	7	6	1	0.875	0.876		7238.66	-2	-2	7	7	1	6	0.268	0.312
	1	2	0	7	2	6	0.457				-2	-2	5	7	2	5	0.298				-2	-2	3	7	6	1	0.875				-2	-2	7	7	1	6	0.268
	-2	-2	2	7	1	6	0.059				0	0	2	7	3	5	0.082				-2	-2	9	7	5	3	0.044				-2	-2	6	7	2	6	0.15
	-2	-2	2	7	3	4	0.048				-2	-2	4	7	5	3	0.049				1	0	0	7	6	1	0.014				0	1	1	7	2	6	0.053
7526.37	-2	-2	7	7	6	2	0.17	0.313		7045.91	-2	-2	4	7	5	3	0.339	0.366		6939.75	-2	-2	7	7	2	5	0.146	0.192		7298.78	1	0	2	7	1	6	0.294	0.345
	-2	-2	7	7	6	2	0.17				-2	-2	4	7	5	3	0.339				-2	-2	7	7	2	5	0.146				1	0	2	7	1	6	0.294
	-2	-2	7	7	4	4	0.142				-2	-2	5	7	4	3	0.161				-2	-2	6	7	3	5	0.14				-2	-2	8	7	2	6	0.244
	-2	-2	4	7	6	2	0.118				-2	-2	6	7	4	3	0.062				-2	-2	5	7	3	5	0.114				1	2	0	7	1	6	0.076
7550.55	-2	-2	5	7	7	0	0.438	0.48		7063.18	1	0	2	7	1	7	0.221	0.272		6986.04	-2	-2	4	7	4	3	0.165	0.229		7336.85	-2	-2	5	7	6	2	0.443	0.446
	-2	-2	5	7	7	0	0.438				-2	-2	8	7	0	7	0.239				-2	-2	5	7	3	5	0.192				-2	-2	5	7	6	2	0.443
	-2	-2	7	7	6	2	0.091				1	0	2	7	1	7	0.221				-2	-2	4	7	4	3	0.165				-2	-2	7	7	5	2	0.189
	-2	-2	6	7	5	2	0.087				1	2	0	7	1	7	0.061				-2	-2	7	7	2	5	0.084				0	0	2	7	7	0	0.037
7635.95	-2	-2	7	7	6	2	0.257	0.259		7084.43	-2	-2	5	7	2	5	0.148	0.221		7062.48	1	0	2	7	0	7	0.274	0.274		7375.34	-2	-2	7	7	3	4	0.251	0.357
	-2	-2	7	7	6	2	0.257				-2	-2	5	7	2	5	0.148				1	0	2	7	0	7	0.274				-2	-2	7	7	3	4	0.251
	-2	-2	6	7	7	0	0.169				-2	-2	6	7	0	7	0.069				-2	-2	8	7	1	7	0.205				-2	-2	5	7	4	4	0.122
	-2	-2	5	7	7	0	0.12				-2	-2	7	7	1	7	0.055				1	2	0	7	0	7	0.091				-2	-2	6	7	4	4	0.117
7658.92	1	2	0	7	4	4	0.275	0.275		7132.71	-2	-2	3	7	7	1	0.889	0.89		7084.36	-2	-2	7	7	0	7	0.094	0.131		7413.04	1	2	0	7	1	6	0.4	0.423
	1	2	0	7	4	4	0.275				-2	-2	3	7	7	1	0.889				-2	-2	7	7	0	7	0.094				1	2	0	7	1	6	0.4
	1	0	2	7	4	4	0.226				-2	-2	9	7	6	1	0.031				-2	-2	6	7	1	7	0.082				-2	-2	2	7	2	6	0.083
	-2	-2	8	7	3	4	0.16				1	0	0	7	7	1	0.023				-2	-2	5	7	1	7	0.079				-2	-2	6	7	2	6	0.033
7694.26	-2	-2	8	7	1	6	0.265	0.324		7151.45	-2	-2	5	7	4	3	0.255	0.297		7172.55	-2	-2	5	7	5	3	0.425	0.445		7460.08	-2	-2	6	7	6	2	0.269	0.449
	-2	-2	8	7	1	6	0.265				-2	-2	4	7	5	3	0.287				-2	-2	5	7	5	3	0.425				-2	-2	6	7	6	2	0.269
	1	0	2	7	4	4	0.154				-2	-2	5	7	4	3	0.255				-2	-2	7	7	4	3	0.153				-2	-2	6	7	4	4	0.181
	1	2	0	7	4	4	0.079				-2	-2	7	7	3	5	0.103				-2	-2	4	7	6	1	0.073				-2	-2	7	7	5	2	0.138
7757.44	-2	-2	8	7	1	6	0.21	0.23		7227.81	1	2	0	7	1	7	0.286	0.362		7226.44	1	2	0	7	0	7	0.344	0.345		7564.53	1	2	0	7	3	4	0.495	0.565
	1	2	0	7	4	4	0.211				1	2	0	7	1	7	0.286				1	2	0	7	0	7	0.344				1	2	0	7	3	4	0.495
	-2	-2	8	7	1	6	0.21				-2	-2	2	7	0	7	0.094				-2	-2	2	7	1	7	0.092				1	0	2	7	3	4	0.135
	1	0	2	7	2	6	0.138				1	2	0	7	3	5	0.076				-2	-2	6	7	1	7	0.04				1	0	2	7	1	6	0.076
7873.99	-2	-2	8	7	3	4	0.331	0.386		7247.03	-2	-2	6	7	4	3	0.336	0.486		7259.84	-2	-2	7	7	4	3	0.177	0.352		7609.11	-2	-2	4	7	7	0	0.364	0.366
	-2	-2	8	7	3	4	0.331				-2	-2	6	7	4	3	0.336				-2	-2	6	7	5	3	0.193				-2	-2	4	7	7	0	0.364
	-2	-2	6	7	7	0	0.159				-2	-2	7	7	5	3	0.167				-2	-2	7	7	4	3	0.177				-2	-2	6	7	6	2	0.213
	1	0	2	7	4	4	0.1				-2	-2	6	7	2	5	0.139				-2	-2	7	7	2	5	0.144				-2	-2	7	7	5	2	0.122
7888.54	-2	-2	6	7	7	0	0.421	0.427		7340.64	-2	-2	5	7	6	1	0.469	0.481		7328.62	-2	-2	6	7	3	5	0.185	0.383		7683.97	1	0	2	7	3	4	0.259	0.347
	-2	-2	6	7	7	0	0.421				-2	-2	5	7	6	1	0.469				-2	-2	7	7	2	5	0.188				1	0	2	7	3	4	0.259
	-2	-2	8	7	3	4	0.137				-2	-2	7	7	5	3	0.122				-2	-2	6	7	3	5	0.185				-2	-2	8	7	4	4	0.168
	-2	-2	5	7	7	0	0.121				-2	-2	6	7	4	3	0.048				-2	-2	6	7	5	3	0.157				1	2	0	7	1	6	0.101
7995.85	1	2	0	7	6	2	0.378	0.38		7382.65	-2	-2	7	7	3	5	0.179	0.236		7354.16	-2	-2	4	7	6	1	0.589	0.591		7728.79	-2	-2	4	7	7	0	0.367	0.371
	1	2	0	7	6	2	0.378				-2	-2	7	7	3	5	0.179				-2	-2	4	7	6	1	0.589				-2	-2	4	7	7	0	0.367
	-2	-2	8	7	5	2	0.316				-2	-2	5	7	4	3	0.159				-2	-2	7	7	4	3	0.188				-2	-2	6	7	6	2	0.138
	-2	-2	6	7	7	0	0.043				-2	-2	6	7	2	5	0.137				0	1	1	7	5	3	0.024				-2	-2	7	7	7	0	0.101
8024.59	1	0	2	7	6	2	0.376	0.456		7461.62	-2	-2	6	7	6	1	0.277	0.449		7467.28	1	2	0	7	2	5	0.369	0.375		7747.55	-2	-2	8	7	2	6	0.258	0.262
	1	0	2	7	6	2	0.376				-2	-2	6	7	6	1	0.277				1	2	0	7	2	5	0.369				-2	-2	8	7	2	6	0.258
	-2	-2	8	7	5	2	0.175				-2	-2	6	7	4	3	0.171				1	0	2	7	2	5	0.32				1	0	2	7	1	6	0.153
	1	0	2	7	4	4	0.08				-2	-2	7	7	5	3	0.157				-2	-2	8	7	3	5	0.09				1	2	0	7	3	4	0.133
8057.57	-2	-2	9	7	1	6	0.291	0.357		7492.13	1	0	2	7	3	5	0.332	0.364		7522.37	-2	-2	7	7	4	3	0.139	0.252		7819.81	1	2	0	7	5	2	0.356	0.359
	-2	-2	9	7	1	6	0.291				1	0	2	7	3	5	0.332				-2	-2	7	7	4	3	0.139				1	2	0	7	5	2	0.356
	-2	-2	11	7	2	6	0.266				-2	-2	8	7	2	5	0.211				-2	-2	4	7	6	1	0.138				-2	-2	7	7	7	0	0.223
	-2	-2	9	7	3	4	0.066				1	2	0	7	3	5	0.164				-2	-2	5	7	5	3	0.13				-2	-2	8	7	4	4	0.167
8118.96	-2	-2	10	7	2	6	0.631	0.649		7548.43	1	2	0	7	3	5	0.222	0.23		7536.16	-2	-2	5	7	7	1	0.206	0.209		7848.19	-2	-2	7	7	7	0	0.457	0.461
	-2	-2	10	7	2	6	0.631				1	2	0	7	3	5	0.222				-2	-2	5	7	7	1	0.206				-2	-2	7	7	7	0	0.457
	-2	-2	11	7	2	6	0.101				-2	-2	8	7	0	7	0.141				-2	-2	7	7	6	1	0.136				1	2	0	7	5	2	0.104
	-2	-2	10	7	4	4	0.018				1	0	2	7	1	7	0.066				1	2	0	7	2	5	0.096				-2	-2	6	7	6	2	0.081
8202.69	1	2	0	7	6	2	0.361	0.365		7600.18	1	2	0	7	3	5	0.128	0.256		7558.72	-2	-2	5	7	7	1	0.288	0.314		7886.87	1	0	2	7	5	2	0.375	0.544
	1	2	0	7	6	2	0.361				-2	-2	8	7	0	7	0.137				-2	-2	5	7	7	1	0.288				1	0	2	7	5	2	0.375
	1	0	2	7	6	2	0.289				1	2	0	7	3	5	0.128				-2	-2	6	7	5	3	0.091				1	0	2	7	3	4	0.138
	-2	-2	8	7	5	2	0.168				1	2	0	7	1	7	0.125				-2	-2	8	7	3	5	0.089				1	2	0	7	5	2	0.062
8281.76	-2	-2	11	7	2	6	0.434	0.471		7612.02	-2	-2	4	7	7	1	0.335	0.338		7588.69	1	2	0	7	2	5	0.142	0.226		8010.96	-2	-2	8	7	4	4	0.313	0.333
	-2	-2	11	7	2	6	0.434				-2	-2	4	7	7	1	0.335				-2	-2	8	7	1	7	0.191				-2	-2	8	7	4	4	0.313
	-2	-2	9	7	3	4	0.087				-2	-2	6	7	6	1	0.197				1	2	0	7	2	5	0.142				1	2	0	7	5	2	0.25
	-2	-2	10	7	2	6	0.08				-2	-2	7	7	5	3	0.1				1	0	2	7	0	7	0.111				1	0	2	7	5	2	0.171
8365.32	-2	-2	9	7	3	4	0.338	0.642		7729.55	-2	-2	4	7	7	1	0.405	0.41		7638.26	-2	-2	7	7	6	1	0.294	0.294		8057.67	-2	-2	9	7	2	6	0.348	0.348
	-2	-2	9	7	3	4	0.338				-2	-2	4	7	7	1	0.405				-2	-2	7	7	6	1	0.294				-2	-2	9	7	2	6	0.348
	-2	-2	9	7	1	6	0.287				-2	-2	6	7	6	1	0.144				-2	-2	6	7	7	1	0.191				-2	-2	11	7	1	6	0.215
	-2	-2	11	7	4	4	0.149				-2	-2	5	7	6	1	0.119				-2	-2	5	7	7	1	0.122				-2	-2	11	7	3	4	0.054
8425.01	-2	-2	8	7	7	0	0.831	0.832		7795.29	-2	-2	8	7	2	5	0.393	0.429		7681.7	1	2	0	7	4	3	0.497	0.513		8099.78	-2	-2	10	7	1	6	0.663	0.671
	-2	-2	8	7	7	0	0.831				-2	-2	8	7	2	5	0.393				1	2	0	7	4	3	0.497				-2	-2	10	7	1	6	0.663
	1	0	2	7	6	2	0.025				1	2	0	7	5	3	0.111				1	0	2	7	4	3	0.087				-2	-2	11	7	1	6	0.104
	0	1	1	7	7	0	0.009				1	0	2	7	3	5	0.069				-2	-2	8	7	3	5	0.073				-2	-2	4	7	3	4	0.011
8469.25	-2	-2	10	7	4	4	0.275	0.296		7819.36	-2	-2	8	7	4	3	0.407	0.452		7789.13	1	0	2	7	4	3	0.483	0.571		8180.85	1	2	0	7	7	0	0.395	0.397
	-2	-2	10	7	4	4	0.275				-2	-2	8	7	4	3	0.407				1	0	2	7	4	3	0.483				1	2	0	7	7	0	0.395
	-2	-2	11	7	4	4	0.061				1	2	0	7	5	3	0.252				-2	-2	8	7	5	3	0.092				1	0	2	7	7	0	0.26
	-2	-2	5	7	1	6	0.032				-2	-2	7	7	7	1	0.084				1	0	2	7	2	5	0.081				-2	-2	8	7	6	2	0.157
8519.75	-2	-2	11	7	4	4	0.526	0.529		7842.49	-2	-2	7	7	7	1	0.403	0.406		7844.03	-2	-2	9	7	1	7	0.233	0.279		8211.56	-2	-2	8	7	6	2	0.508	0.508
	-2	-2	11	7	4	4	0.526				-2	-2	7	7	7	1	0.403				-2	-2	9	7	1	7	0.233				-2	-2	8	7	6	2	0.508
	-2	-2	9	7	3	4	0.15				-2	-2	9	7	0	7	0.085				-2	-2	11	7	0	7	0.205				1	0	2	7	7	0	0.202
	-2	-2	10	7	4	4	0.102				1	0	2	7	5	3	0.069				-2	-2	3	7	0	7	0.077				1	0	2	7	5	2	0.052
8534.15	-2	-2	5	7	3	4	0.048	0.098		7847.56	-2	-2	9	7	0	7	0.197	0.198		7869.26	-2	-2	8	7	3	5	0.259	0.308		8271	-2	-2	11	7	1	6	0.502	0.505
	-2	-2	10	7	4	4	0.068				-2	-2	9	7	0	7	0.197				-2	-2	8	7	3	5	0.259				-2	-2	11	7	1	6	0.502
	-2	-2	7	7	2	6	0.052				-2	-2	11	7	1	7	0.142				1	0	2	7	2	5	0.142				-2	-2	9	7	2	6	0.117
	-2	-2	5	7	3	4	0.048				-2	-2	7	7	7	1	0.126				1	2	0	7	4	3	0.141				-2	-2	10	7	1	6	0.095
8561.27	-2	-2	9	7	5	2	0.601	0.647		7876.38	1	0	2	7	5	3	0.269	0.356		7886.46	-2	-2	6	7	7	1	0.513	0.517		8327.2	-2	-2	10	7	3	4	0.605	0.652
	-2	-2	9	7	5	2	0.601				1	0	2	7	5	3	0.269				-2	-2	6	7	7	1	0.513				-2	-2	10	7	3	4	0.605
	-2	-2	10	7	4	4	0.046				1	2	0	7	5	3	0.158				-2	-2	5	7	7	1	0.158				-2	-2	11	7	3	4	0.107
	-2	-2	9	7	3	4	0.041				1	0	2	7	3	5	0.068				-2	-2	7	7	6	1	0.073				-2	-2	10	7	1	6	0.034
8566.21	-2	-2	10	7	4	4	0.265	0.309		7895.52	-2	-2	10	7	1	7	0.425	0.564		7894.51	-2	-2	10	7	0	7	0.556	0.565		8371.86	-2	-2	11	7	3	4	0.496	0.504
	-2	-2	10	7	4	4	0.265				-2	-2	10	7	1	7	0.425				-2	-2	10	7	0	7	0.556				-2	-2	11	7	3	4	0.496
	-2	-2	11	7	4	4	0.106				-2	-2	10	7	3	5	0.139				-2	-2	11	7	0	7	0.09				-2	-2	9	7	4	4	0.185
	-2	-2	10	7	2	6	0.042				-2	-2	11	7	1	7	0.068				-2	-2	10	7	2	5	0.009				-2	-2	10	7	3	4	0.097
8685.66	-2	-2	10	7	2	6	0.054	0.061		8010.84	-2	-2	8	7	4	3	0.317	0.347		7996.51	1	2	0	7	6	1	0.39	0.393		8436.1	-2	-2	9	7	4	4	0.289	0.299
	-2	-2	7	7	2	6	0.057				-2	-2	8	7	4	3	0.317				1	2	0	7	6	1	0.39				-2	-2	9	7	4	4	0.289
	-2	-2	10	7	2	6	0.054				1	2	0	7	5	3	0.239				-2	-2	8	7	5	3	0.291				1	2	0	7	7	0	0.159
	-2	-2	4	7	2	6	0.034				1	0	2	7	5	3	0.196				-2	-2	6	7	7	1	0.045				-2	-2	11	7	3	4	0.137
										8123.52	-2	-2	11	7	1	7	0.301	0.427		8026.38	1	0	2	7	6	1	0.371	0.465		8445.2	1	0	2	7	7	0	0.256	0.269
											-2	-2	11	7	1	7	0.301				1	0	2	7	6	1	0.371				1	2	0	7	7	0	0.263
											-2	-2	11	7	3	5	0.126				-2	-2	8	7	5	3	0.189				1	0	2	7	7	0	0.256
											-2	-2	9	7	0	7	0.084				1	0	2	7	4	3	0.094				-2	-2	9	7	4	4	0.134
										8180.76	1	2	0	7	7	1	0.393	0.396		8122.74	-2	-2	11	7	0	7	0.415	0.427		8515.36	-2	-2	5	7	2	6	0.148	0.176
											1	2	0	7	7	1	0.393				-2	-2	11	7	0	7	0.415				-2	-2	5	7	2	6	0.148
											1	0	2	7	7	1	0.259				-2	-2	10	7	0	7	0.099				-2	-2	10	7	3	4	0.067
											-2	-2	8	7	6	1	0.157				-2	-2	9	7	1	7	0.09				-2	-2	5	7	4	4	0.027
										8211.46	-2	-2	8	7	6	1	0.502	0.503		8202.85	1	2	0	7	6	1	0.355	0.359		8540.18	-2	-2	6	7	2	6	0.09	0.108
											-2	-2	8	7	6	1	0.502				1	2	0	7	6	1	0.355				-2	-2	6	7	2	6	0.09
											1	0	2	7	7	1	0.203				1	0	2	7	6	1	0.278				-2	-2	7	7	3	4	0.049
											1	0	2	7	5	3	0.049				-2	-2	8	7	5	3	0.167				-2	-2	7	7	1	6	0.043
										8232.03	-2	-2	9	7	2	5	0.405	0.427		8209.81	-2	-2	10	7	2	5	0.525	0.58		8663.8	-2	-2	11	7	5	2	0.643	0.648
											-2	-2	9	7	2	5	0.405				-2	-2	10	7	2	5	0.525				-2	-2	11	7	5	2	0.643
											-2	-2	11	7	3	5	0.214				-2	-2	11	7	2	5	0.114				-2	-2	10	7	5	2	0.097
											-2	-2	11	7	1	7	0.072				-2	-2	10	7	4	3	0.053				-2	-2	9	7	4	4	0.057
										8254.19	-2	-2	6	7	0	7	0.111	0.116		8231.3	-2	-2	9	7	3	5	0.353	0.368		8691.27	-2	-2	10	7	3	4	0.034	0.065
											-2	-2	6	7	0	7	0.111				-2	-2	9	7	3	5	0.353				-2	-2	7	7	1	6	0.044
											-2	-2	7	7	1	7	0.092				-2	-2	11	7	2	5	0.291				-2	-2	10	7	3	4	0.034
											-2	-2	10	7	3	5	0.063				-2	-2	10	7	2	5	0.083				-2	-2	10	7	1	6	0.029
										8258.4	-2	-2	10	7	3	5	0.156	0.16		8255.37	-2	-2	6	7	1	7	0.11	0.115		8713.27	-2	-2	9	7	6	2	0.692	0.7
											-2	-2	10	7	3	5	0.156				-2	-2	6	7	1	7	0.11				-2	-2	9	7	6	2	0.692
											-2	-2	5	7	0	7	0.145				-2	-2	7	7	0	7	0.086				-2	-2	11	7	5	2	0.038
											0	0	2	7	1	7	0.035				-2	-2	5	7	1	7	0.078				-2	-2	3	7	7	0	0.029
										8330.19	-2	-2	10	7	3	5	0.342	0.554		8285.8	-2	-2	10	7	2	5	0.095	0.196
											-2	-2	10	7	3	5	0.342				-2	-2	5	7	1	7	0.1
											-2	-2	10	7	1	7	0.194				-2	-2	10	7	2	5	0.095
											-2	-2	11	7	1	7	0.055				-2	-2	10	7	0	7	0.072
										8406.2	-2	-2	11	7	3	5	0.385	0.502		8357.4	-2	-2	11	7	2	5	0.408	0.55
											-2	-2	11	7	3	5	0.385				-2	-2	11	7	2	5	0.408
											-2	-2	9	7	2	5	0.156				-2	-2	9	7	3	5	0.167
											-2	-2	11	7	1	7	0.087				-2	-2	11	7	4	3	0.142
										8442.13	1	2	0	7	7	1	0.403	0.404		8425.08	-2	-2	8	7	7	1	0.831	0.831
											1	2	0	7	7	1	0.403				-2	-2	8	7	7	1	0.831
											1	0	2	7	7	1	0.334				1	0	2	7	6	1	0.025
											-2	-2	8	7	6	1	0.066				0	1	1	7	7	1	0.009
										8454.06	-2	-2	9	7	4	3	0.62	0.744		8500.31	-2	-2	11	7	4	3	0.195	0.208
											-2	-2	9	7	4	3	0.62				-2	-2	11	7	4	3	0.195
											-2	-2	9	7	2	5	0.123				-2	-2	10	7	4	3	0.105
											-2	-2	11	7	5	3	0.057				-2	-2	7	7	0	7	0.051
										8506.06	-2	-2	10	7	1	7	0.085	0.086		8509.15	-2	-2	11	7	4	3	0.458	0.49
											-2	-2	10	7	1	7	0.085				-2	-2	11	7	4	3	0.458
											-2	-2	7	7	1	7	0.076				-2	-2	10	7	4	3	0.114
											-2	-2	4	7	1	7	0.038				-2	-2	11	7	2	5	0.031
										8665.42	-2	-2	11	7	5	3	0.662	0.669		8514.86	-2	-2	10	7	4	3	0.449	0.513
											-2	-2	11	7	5	3	0.662				-2	-2	10	7	4	3	0.449
											-2	-2	10	7	5	3	0.088				-2	-2	10	7	2	5	0.034
											-2	-2	9	7	4	3	0.073				-2	-2	10	7	0	7	0.026
										8685.99	-2	-2	10	7	5	3	0.165	0.196		8560.32	-2	-2	9	7	5	3	0.61	0.621
											-2	-2	10	7	5	3	0.165				-2	-2	9	7	5	3	0.61
											-2	-2	5	7	2	5	0.03				-2	-2	11	7	4	3	0.072
											-2	-2	5	7	4	3	0.025				-2	-2	11	7	6	1	0.037
