# Supplementary material for: MARVEL analysis of the rotational–vibrational states of the molecular ions H2D+ and D2H+
Source: Royal Society of Chemistry journal article supplement (doi:10.1039/c3cp44610g), 2013-01-01
Supplement: c3cp44610g_2.xlsx [file c3cp44610g_2.xlsx]

## Sheet: J=0
Evib	n1	n2	n3	sym
4071.46	0	0	0	A1
6277.33	0	1	0	A1
6406.75	0	0	1	B2
7063.95	1	0	0	A1
8358.95	0	2	0	A1
8533.17	0	1	1	B2
8674.08	0	0	2	A1
9111.25	1	1	0	A1
9315.49	1	0	1	B2
9948.74	2	0	0	A1
10359.1	0	3	0	A1
10472	0	2	1	B2
10717.2	0	1	2	A1
10881.3	0	0	3	B2
11063	1	2	0	A1
11294.8	1	1	1	B2
11488	1	0	2	A1
11840.2	2	1	0	A1
12101.9	2	0	1	B2
12257.8	0	4	0	A1

## Sheet: J=1
A1 symmetry										A2 symmetry										B1 symmetry										B2 symmetry
Erovib	n1	n2	n3	J	Ka	Kc	RRD^2	FullVib		Erovib	n1	n2	n3	J	Ka	Kc	RRD^2	FullVib		Erovib	n1	n2	n3	J	Ka	Kc	RRD^2	FullVib		Erovib	n1	n2	n3	J	Ka	Kc	RRD^2	FullVib
2409.18	0	0	1	1	1	0	1	1		45.7	0	0	0	1	0	1	0.989	0.989		60.03	0	0	0	1	1	1	0.99	0.99		72.46	0	0	0	1	1	0	1	1
	0	0	1	1	1	0	1				0	0	0	1	0	1	0.989				0	0	0	1	1	1	0.99				0	0	0	1	1	0	1
	1	0	1	1	1	0	0				0	0	1	1	1	1	0.011				0	0	1	1	0	1	0.01				1	0	0	1	1	0	0
	0	2	1	1	1	0	0				1	0	1	1	1	1	0				1	0	1	1	0	1	0				0	2	0	1	1	0	0
4536.23	0	1	1	1	1	0	1	1		2246.68	0	1	0	1	0	1	0.936	0.936		2258.78	0	1	0	1	1	1	0.929	0.929		2278.42	0	1	0	1	1	0	1	1
	0	1	1	1	1	0	1				0	1	0	1	0	1	0.936				0	1	0	1	1	1	0.929				0	1	0	1	1	0	1
	1	1	1	1	1	0	0				0	0	1	1	1	1	0.053				0	0	1	1	0	1	0.06				1	1	0	1	1	0	0
	0	0	3	1	1	0	0				0	1	1	1	1	1	0.009				0	1	1	1	0	1	0.008				0	3	0	1	1	0	0
5316.08	1	0	1	1	1	0	1	1		2402.66	0	0	1	1	1	1	0.914	0.914		2383.83	0	0	1	1	0	1	0.906	0.906		3063.3	1	0	0	1	1	0	1	1
	1	0	1	1	1	0	1				0	0	1	1	1	1	0.914				0	0	1	1	0	1	0.906				1	0	0	1	1	0	1
	2	0	1	1	1	0	0				0	1	0	1	0	1	0.054				0	1	0	1	1	1	0.062				2	0	0	1	1	0	0
	0	0	1	1	1	0	0				0	0	2	1	0	1	0.016				0	0	2	1	1	1	0.018				0	0	0	1	1	0	0
6479.29	0	2	1	1	1	0	1	1		3038.16	1	0	0	1	0	1	0.988	0.988		3050.48	1	0	0	1	1	1	0.989	0.989		4361.63	0	2	0	1	1	0	1	1
	0	2	1	1	1	0	1				1	0	0	1	0	1	0.988				1	0	0	1	1	1	0.989				0	2	0	1	1	0	1
	0	0	3	1	1	0	0				1	0	1	1	1	1	0.01				1	0	1	1	0	1	0.009				0	0	2	1	1	0	0
	0	1	1	1	1	0	0				0	0	1	1	1	1	0.001				0	0	1	1	0	1	0.001				1	2	0	1	1	0	0
6885.69	0	0	3	1	1	0	1	1		4331.33	0	2	0	1	0	1	0.943	0.943		4343.43	0	2	0	1	1	1	0.95	0.95		4677.62	0	0	2	1	1	0	1	1
	0	0	3	1	1	0	1				0	2	0	1	0	1	0.943				0	2	0	1	1	1	0.95				0	0	2	1	1	0	1
	0	2	1	1	1	0	0				0	1	1	1	1	1	0.041				0	1	1	1	0	1	0.035				0	2	0	1	1	0	0
	0	1	1	1	1	0	0				0	2	1	1	1	1	0.011				0	2	1	1	0	1	0.009				1	0	2	1	1	0	0
7296.71	1	1	1	1	1	0	1	1		4512.43	0	1	1	1	1	1	0.816	0.816		4495.04	0	1	1	1	0	1	0.847	0.847		5111.43	1	1	0	1	1	0	1	1
	1	1	1	1	1	0	1				0	1	1	1	1	1	0.816				0	1	1	1	0	1	0.847				1	1	0	1	1	0	1
	0	1	1	1	1	0	0				0	0	2	1	0	1	0.112				0	0	2	1	1	1	0.084				2	1	0	1	1	0	0
	0	0	3	1	1	0	0				0	2	0	1	0	1	0.038				0	2	0	1	1	1	0.035				0	1	0	1	1	0	0
8101.1	2	0	1	1	1	0	1	1		4657.73	0	0	2	1	0	1	0.835	0.835		4677.09	0	0	2	1	1	1	0.863	0.863		5946.59	2	0	0	1	1	0	1	1
	2	0	1	1	1	0	1				0	0	2	1	0	1	0.835				0	0	2	1	1	1	0.863				2	0	0	1	1	0	1
	1	0	1	1	1	0	0				0	1	1	1	1	1	0.112				0	1	1	1	0	1	0.087				1	0	0	1	1	0	0
	0	1	1	1	1	0	0				0	0	3	1	1	1	0.023				0	0	3	1	0	1	0.021				1	2	0	1	1	0	0
										5082.75	1	1	0	1	0	1	0.959	0.959		5092.42	1	1	0	1	1	1	0.961	0.961		6363.77	0	3	0	1	1	0	1	1
											1	1	0	1	0	1	0.959				1	1	0	1	1	1	0.961				0	3	0	1	1	0	1
											1	0	1	1	1	1	0.029				1	0	1	1	0	1	0.029				0	1	2	1	1	0	0
											1	1	1	1	1	1	0.008				1	1	1	1	0	1	0.007				1	2	0	1	1	0	0
										5307.58	1	0	1	1	1	1	0.936	0.936		5290.99	1	0	1	1	0	1	0.935	0.935		6722.57	0	1	2	1	1	0	1	1
											1	0	1	1	1	1	0.936				1	0	1	1	0	1	0.935				0	1	2	1	1	0	1
											1	1	0	1	0	1	0.03				1	1	0	1	1	1	0.029				0	3	0	1	1	0	0
											1	0	2	1	0	1	0.017				1	0	2	1	1	1	0.019				0	4	0	1	1	0	0
										5922.64	2	0	0	1	0	1	0.987	0.987		5933.41	2	0	0	1	1	1	0.988	0.988		7064.83	1	2	0	1	1	0	1	1
											2	0	0	1	0	1	0.987				2	0	0	1	1	1	0.988				1	2	0	1	1	0	1
											2	0	1	1	1	1	0.009				2	0	1	1	0	1	0.008				0	2	0	1	1	0	0
											1	0	1	1	1	1	0.002				1	0	1	1	0	1	0.002				0	3	0	1	1	0	0
										6330.92	0	3	0	1	0	1	0.899	0.899		6342.8	0	3	0	1	1	1	0.918	0.918		7490.37	1	0	2	1	1	0	1	1
											0	3	0	1	0	1	0.899				0	3	0	1	1	1	0.918				1	0	2	1	1	0	1
											0	2	1	1	1	1	0.08				0	2	1	1	0	1	0.062				0	0	2	1	1	0	0
											0	1	1	1	1	1	0.004				0	1	1	1	0	1	0.004				1	2	0	1	1	0	0
										6466.38	0	2	1	1	1	1	0.834	0.834		6441.75	0	2	1	1	0	1	0.846	0.846		7839.81	2	1	0	1	1	0	1	1
											0	2	1	1	1	1	0.834				0	2	1	1	0	1	0.846				2	1	0	1	1	0	1
											0	3	0	1	0	1	0.08				0	3	0	1	1	1	0.065				1	1	0	1	1	0	0
											0	1	2	1	0	1	0.04				0	1	2	1	1	1	0.043				1	2	0	1	1	0	0
										6676.26	0	1	2	1	0	1	0.82	0.82		6692.81	0	1	2	1	1	1	0.791	0.791		8267.46	0	4	0	1	1	0	1	1
											0	1	2	1	0	1	0.82				0	1	2	1	1	1	0.791				0	4	0	1	1	0	1
											0	0	3	1	1	1	0.086				0	0	3	1	0	1	0.114				0	1	2	1	1	0	0
											0	2	1	1	1	1	0.039				0	2	1	1	0	1	0.04				0	2	0	1	1	0	0
										6886.74	0	0	3	1	1	1	0.838	0.838		6866.4	0	0	3	1	0	1	0.814	0.814
											0	0	3	1	1	1	0.838				0	0	3	1	0	1	0.814
											0	1	2	1	0	1	0.088				0	1	2	1	1	1	0.113
											0	0	2	1	0	1	0.022				0	0	2	1	1	1	0.019
										7039.36	1	2	0	1	0	1	0.956	0.956		7046.7	1	2	0	1	1	1	0.965	0.965
											1	2	0	1	0	1	0.956				1	2	0	1	1	1	0.965
											1	1	1	1	1	1	0.024				1	1	1	1	0	1	0.019
											0	0	3	1	1	1	0.007				0	0	3	1	0	1	0.004
										7275.99	1	1	1	1	1	1	0.87	0.87		7260.55	1	1	1	1	0	1	0.878	0.878
											1	1	1	1	1	1	0.87				1	1	1	1	0	1	0.878
											1	0	2	1	0	1	0.069				1	0	2	1	1	1	0.063
											1	2	0	1	0	1	0.024				1	2	0	1	1	1	0.02
										7467.08	1	0	2	1	0	1	0.871	0.871		7486.21	1	0	2	1	1	1	0.879	0.879
											1	0	2	1	0	1	0.871				1	0	2	1	1	1	0.879
											1	1	1	1	1	1	0.07				1	1	1	1	0	1	0.064
											1	0	1	1	1	1	0.016				1	0	1	1	0	1	0.018
										7813.15	2	1	0	1	0	1	0.969	0.969		7820.63	2	1	0	1	1	1	0.972	0.972
											2	1	0	1	0	1	0.969				2	1	0	1	1	1	0.972
											2	0	1	1	1	1	0.018				2	0	1	1	0	1	0.017
											1	1	1	1	1	1	0.001				1	1	1	1	0	1	0.001
										8091.06	2	0	1	1	1	1	0.943	0.943		8076.22	2	0	1	1	0	1	0.942	0.942
											2	0	1	1	1	1	0.943				2	0	1	1	0	1	0.942
											2	1	0	1	0	1	0.019				2	1	0	1	1	1	0.017
											2	0	0	1	0	1	0.009				2	0	0	1	1	1	0.008
										8230.3	0	4	0	1	0	1	0.846	0.846		8246.51	0	4	0	1	1	1	0.907	0.907
											0	4	0	1	0	1	0.846				0	4	0	1	1	1	0.907
											0	2	1	1	1	1	0.008				0	2	1	1	0	1	0.009
											0	3	0	1	0	1	0.002				1	1	1	1	0	1	0.001

## Sheet: J=2
A1 symmetry										A2 symmetry										B1 symmetry										B2 symmetry
Erovib	n1	n2	n3	J	Ka	Kc	RRD^2	FullVib		Erovib	n1	n2	n3	J	Ka	Kc	RRD^2	FullVib		Erovib	n1	n2	n3	J	Ka	Kc	RRD^2	FullVib		Erovib	n1	n2	n3	J	Ka	Kc	RRD^2	FullVib
131.64	0	0	0	2	0	2	0.961	0.961		218.66	0	0	0	2	2	1	0.991	0.991		175.94	0	0	0	2	1	1	0.988	0.988		138.84	0	0	0	2	1	2	0.959	0.959
	0	0	0	2	0	2	0.961				0	0	0	2	2	1	0.991				0	0	0	2	1	1	0.988				0	0	0	2	1	2	0.959
	0	0	1	2	1	2	0.037				0	0	1	2	1	1	0.009				0	0	1	2	2	1	0.012				0	0	1	2	0	2	0.035
	1	0	1	2	1	2	0.001				1	0	0	2	2	1	0				1	0	1	2	2	1	0				0	0	1	2	2	0	0.004
223.87	0	0	0	2	2	0	0.998	0.998		2415.45	0	1	0	2	2	1	0.92	0.92		2379.37	0	1	0	2	1	1	0.942	0.942		2322.7	0	1	0	2	1	2	0.787	0.787
	0	0	0	2	2	0	0.998				0	1	0	2	2	1	0.92				0	1	0	2	1	1	0.942				0	1	0	2	1	2	0.787
	0	0	1	2	1	2	0.002				0	0	1	2	1	1	0.07				0	0	1	2	2	1	0.046				0	0	1	2	0	2	0.154
	1	0	0	2	2	0	0				0	1	1	2	1	1	0.007				0	1	1	2	2	1	0.01				0	1	1	2	0	2	0.025
2318.33	0	1	0	2	0	2	0.796	0.799		2512.36	0	0	1	2	1	1	0.895	0.895		2568.34	0	0	1	2	2	1	0.922	0.922		2477.64	0	0	1	2	0	2	0.723	0.745
	0	1	0	2	0	2	0.796				0	0	1	2	1	1	0.895				0	0	1	2	2	1	0.922				0	0	1	2	0	2	0.723
	0	0	1	2	1	2	0.152				0	1	0	2	2	1	0.072				0	1	0	2	1	1	0.047				0	1	0	2	1	2	0.156
	0	1	1	2	1	2	0.027				0	0	2	2	2	1	0.02				0	0	2	2	1	1	0.014				0	0	2	2	1	2	0.049
2427.08	0	1	0	2	2	0	0.979	0.99		3203.84	1	0	0	2	2	1	0.99	0.99		3167.11	1	0	0	2	1	1	0.987	0.987		2569.45	0	0	1	2	2	0	0.96	0.964
	0	1	0	2	2	0	0.979				1	0	0	2	2	1	0.99				1	0	0	2	1	1	0.987				0	0	1	2	2	0	0.96
	0	1	0	2	0	2	0.011				1	0	1	2	1	1	0.008				1	0	1	2	2	1	0.011				0	1	0	2	1	2	0.02
	0	0	1	2	1	2	0.008				0	0	1	2	1	1	0.001				0	0	1	2	2	1	0.001				0	0	2	2	1	2	0.006
2490.92	0	0	1	2	1	2	0.711	0.711		4502.44	0	2	0	2	2	1	0.956	0.956		4466.75	0	2	0	2	1	1	0.936	0.936		3128.85	1	0	0	2	1	2	0.955	0.955
	0	0	1	2	1	2	0.711				0	2	0	2	2	1	0.956				0	2	0	2	1	1	0.936				1	0	0	2	1	2	0.955
	0	1	0	2	0	2	0.158				0	1	1	2	1	1	0.027				0	1	1	2	2	1	0.046				1	0	1	2	0	2	0.033
	0	0	2	2	0	2	0.05				0	2	1	2	1	1	0.008				0	2	1	2	2	1	0.012				1	0	1	2	2	0	0.004
3123.29	1	0	0	2	0	2	0.956	0.957		4626.15	0	1	1	2	1	1	0.868	0.868		4677.43	0	1	1	2	2	1	0.768	0.768		4412.34	0	2	0	2	1	2	0.797	0.797
	1	0	0	2	0	2	0.956				0	1	1	2	1	1	0.868				0	1	1	2	2	1	0.768				0	2	0	2	1	2	0.797
	1	0	1	2	1	2	0.035				0	0	2	2	2	1	0.066				0	0	2	2	1	1	0.158				0	1	1	2	0	2	0.121
	0	0	1	2	1	2	0.004				0	2	0	2	2	1	0.03				0	2	0	2	1	1	0.039				0	2	1	2	0	2	0.026
3209.81	1	0	0	2	2	0	0.997	0.997		4846.21	0	0	2	2	2	1	0.879	0.879		4788.64	0	0	2	2	1	1	0.788	0.788		4555.74	0	1	1	2	0	2	0.557	0.558
	1	0	0	2	2	0	0.997				0	0	2	2	2	1	0.879				0	0	2	2	1	1	0.788				0	1	1	2	0	2	0.557
	1	0	1	2	1	2	0.002				0	1	1	2	1	1	0.071				0	1	1	2	2	1	0.157				0	0	2	2	1	2	0.186
	1	0	0	2	0	2	0.001				0	0	1	2	1	1	0.019				0	0	3	2	2	1	0.023				0	2	0	2	1	2	0.115
4407.8	0	2	0	2	0	2	0.796	0.798		5244.84	1	1	0	2	2	1	0.962	0.962		5215.98	1	1	0	2	1	1	0.958	0.958		4691.41	0	1	1	2	2	0	0.93	0.95
	0	2	0	2	0	2	0.796				1	1	0	2	2	1	0.962				1	1	0	2	1	1	0.958				0	1	1	2	2	0	0.93
	0	1	1	2	1	2	0.134				1	0	1	2	1	1	0.027				1	0	1	2	2	1	0.029				0	0	2	2	1	2	0.031
	0	2	1	2	1	2	0.029				1	1	1	2	1	1	0.006				1	1	1	2	2	1	0.009				0	1	1	2	0	2	0.02
4512.37	0	2	0	2	2	0	0.989	0.995		5418.12	1	0	1	2	1	1	0.934	0.934		5467.43	1	0	1	2	2	1	0.937	0.937		4779.22	0	0	2	2	1	2	0.575	0.575
	0	2	0	2	2	0	0.989				1	0	1	2	1	1	0.934				1	0	1	2	2	1	0.937				0	0	2	2	1	2	0.575
	0	2	0	2	0	2	0.006				1	1	0	2	2	1	0.028				1	1	0	2	1	1	0.029				0	1	1	2	0	2	0.189
	0	0	2	2	0	2	0.001				1	0	2	2	2	1	0.021				1	0	2	2	1	1	0.015				0	0	3	2	0	2	0.056
4563.27	0	1	1	2	1	2	0.518	0.518		6082.26	2	0	0	2	2	1	0.988	0.988		6050.13	2	0	0	2	1	1	0.985	0.985		5160	1	1	0	2	1	2	0.86	0.86
	0	1	1	2	1	2	0.518				2	0	0	2	2	1	0.988				2	0	0	2	1	1	0.985				1	1	0	2	1	2	0.86
	0	0	2	2	0	2	0.205				2	0	1	2	1	1	0.008				2	0	1	2	2	1	0.011				1	0	1	2	0	2	0.086
	0	2	0	2	0	2	0.117				1	0	1	2	1	1	0.002				1	0	1	2	2	1	0.002				1	1	1	2	0	2	0.023
4761.27	0	0	2	2	0	2	0.591	0.657		6504.55	0	3	0	2	2	1	0.944	0.944		6470.21	0	3	0	2	1	1	0.887	0.887		5381.68	1	0	1	2	0	2	0.786	0.796
	0	0	2	2	0	2	0.591				0	3	0	2	2	1	0.944				0	3	0	2	1	1	0.887				1	0	1	2	0	2	0.786
	0	1	1	2	1	2	0.19				0	2	1	2	1	1	0.034				0	2	1	2	2	1	0.09				1	1	0	2	1	2	0.088
	0	0	2	2	2	0	0.066				0	1	2	2	2	1	0.007				0	1	1	2	2	1	0.004				1	0	2	2	1	2	0.057
4845.09	0	0	2	2	2	0	0.909	0.922		6574.37	0	2	1	2	1	1	0.865	0.865		6646.15	0	2	1	2	2	1	0.827	0.827		5469.71	1	0	1	2	2	0	0.973	0.974
	0	0	2	2	2	0	0.909				0	2	1	2	1	1	0.865				0	2	1	2	2	1	0.827				1	0	1	2	2	0	0.973
	0	1	1	2	1	2	0.038				0	1	2	2	2	1	0.047				0	3	0	2	1	1	0.088				1	1	0	2	1	2	0.011
	0	0	1	2	1	2	0.013				0	3	0	2	2	1	0.04				0	1	2	2	1	1	0.038				1	0	2	2	1	2	0.005
5157.05	1	1	0	2	0	2	0.854	0.862		6861.38	0	1	2	2	2	1	0.735	0.735		6812.29	0	1	2	2	1	1	0.834	0.834		6010.77	2	0	0	2	1	2	0.949	0.949
	1	1	0	2	0	2	0.854				0	1	2	2	2	1	0.735				0	1	2	2	1	1	0.834				2	0	0	2	1	2	0.949
	1	0	1	2	1	2	0.09				0	0	3	2	1	1	0.164				0	0	3	2	2	1	0.068				2	0	1	2	0	2	0.031
	1	1	1	2	1	2	0.025				0	2	1	2	1	1	0.042				0	2	1	2	2	1	0.039				1	0	1	2	0	2	0.007
5256.78	1	1	0	2	2	0	0.984	0.997		6998.53	0	0	3	2	1	1	0.765	0.765		7058.52	0	0	3	2	2	1	0.846	0.846		6409.11	0	3	0	2	1	2	0.696	0.696
	1	1	0	2	2	0	0.984				0	0	3	2	1	1	0.765				0	0	3	2	2	1	0.846				0	3	0	2	1	2	0.696
	1	1	0	2	0	2	0.013				0	1	2	2	2	1	0.163				0	1	2	2	1	1	0.073				0	2	1	2	0	2	0.184
	1	0	1	2	1	2	0.001				0	0	2	2	2	1	0.016				0	0	2	2	1	1	0.025				0	1	2	2	1	2	0.022
5392.1	1	0	1	2	1	2	0.771	0.771		7199.75	1	2	0	2	2	1	0.972	0.972		7177.97	1	2	0	2	1	1	0.94	0.94		6518.9	0	2	1	2	0	2	0.525	0.545
	1	0	1	2	1	2	0.771				1	2	0	2	2	1	0.972				1	2	0	2	1	1	0.94				0	2	1	2	0	2	0.525
	1	1	0	2	0	2	0.094				1	1	1	2	1	1	0.014				1	1	1	2	2	1	0.028				0	3	0	2	1	2	0.187
	1	0	2	2	0	2	0.056				0	0	3	2	1	1	0.002				0	0	3	2	2	1	0.016				0	1	2	2	1	2	0.111
6006.39	2	0	0	2	0	2	0.95	0.951		7391.61	1	1	1	2	1	1	0.886	0.886		7437.38	1	1	1	2	2	1	0.858	0.858		6649.3	0	2	1	2	2	0	0.932	0.934
	2	0	0	2	0	2	0.95				1	1	1	2	1	1	0.886				1	1	1	2	2	1	0.858				0	2	1	2	2	0	0.932
	2	0	1	2	1	2	0.033				1	0	2	2	2	1	0.057				1	0	2	2	1	1	0.076				0	3	0	2	1	2	0.03
	1	0	1	2	1	2	0.008				1	2	0	2	2	1	0.016				1	2	0	2	1	1	0.027				0	1	2	2	1	2	0.013
6088.96	2	0	0	2	2	0	0.995	0.997		7652.09	1	0	2	2	2	1	0.884	0.884		7595.21	1	0	2	2	1	1	0.862	0.862		6735.43	0	1	2	2	1	2	0.462	0.462
	2	0	0	2	2	0	0.995				1	0	2	2	2	1	0.884				1	0	2	2	1	1	0.862				0	1	2	2	1	2	0.462
	2	0	0	2	0	2	0.003				1	1	1	2	1	1	0.059				1	1	1	2	2	1	0.077				0	0	3	2	0	2	0.189
	2	0	1	2	1	2	0.001				1	0	1	2	1	1	0.02				1	0	1	2	2	1	0.014				0	2	1	2	0	2	0.096
6404.46	0	3	0	2	0	2	0.685	0.687		7969.64	2	1	0	2	2	1	0.974	0.974		7947.21	2	1	0	2	1	1	0.966	0.966		6969.69	0	0	3	2	0	2	0.546	0.621
	0	3	0	2	0	2	0.685				2	1	0	2	2	1	0.974				2	1	0	2	1	1	0.966				0	0	3	2	0	2	0.546
	0	2	1	2	1	2	0.214				2	0	1	2	1	1	0.015				2	0	1	2	2	1	0.02				0	1	2	2	1	2	0.166
	0	1	2	2	0	2	0.016				1	1	1	2	1	1	0.001				1	1	1	2	2	1	0.001				0	0	3	2	2	0	0.075
6514.2	0	3	0	2	2	0	0.943	0.946		8202.27	2	0	1	2	1	1	0.942	0.942		8246.32	2	0	1	2	2	1	0.942	0.942		7053.96	0	0	3	2	2	0	0.861	0.868
	0	3	0	2	2	0	0.943				2	0	1	2	1	1	0.942				2	0	1	2	2	1	0.942				0	0	3	2	2	0	0.861
	0	2	1	2	1	2	0.034				2	1	0	2	2	1	0.015				2	1	0	2	1	1	0.02				1	2	0	2	1	2	0.053
	0	1	1	2	1	2	0.004				2	0	0	2	2	1	0.007				2	0	0	2	1	1	0.01				0	1	2	2	1	2	0.028
6536.9	0	2	1	2	1	2	0.441	0.441		8414.59	0	4	0	2	2	1	0.959	0.959		8373.28	0	4	0	2	1	1	0.815	0.815		7126.85	1	2	0	2	1	2	0.802	0.802
	0	2	1	2	1	2	0.441				0	4	0	2	2	1	0.959				0	4	0	2	1	1	0.815				1	2	0	2	1	2	0.802
	0	3	0	2	0	2	0.224				0	2	1	2	1	1	0.011				0	2	1	2	2	1	0.008				1	1	1	2	0	2	0.056
	0	1	2	2	0	2	0.117				0	3	0	2	2	1	0.001				0	3	0	2	1	1	0.003				0	0	3	2	2	0	0.037
6730.15	0	1	2	2	0	2	0.492	0.492																						7326.78	1	1	1	2	0	2	0.625	0.625
	0	1	2	2	0	2	0.492																								1	1	1	2	0	2	0.625
	0	0	3	2	1	2	0.175																								1	0	2	2	1	2	0.156
	0	2	1	2	1	2	0.102																								1	2	0	2	1	2	0.072
6881.13	0	1	2	2	2	0	0.927	0.955																						7448.71	1	1	1	2	2	0	0.965	0.976
	0	1	2	2	2	0	0.927																								1	1	1	2	2	0	0.965
	0	1	2	2	0	2	0.028																								1	1	1	2	0	2	0.011
	0	0	3	2	1	2	0.023																								1	0	2	2	1	2	0.01
6988.75	0	0	3	2	1	2	0.518	0.518																						7579.48	1	0	2	2	1	2	0.609	0.609
	0	0	3	2	1	2	0.518																								1	0	2	2	1	2	0.609
	0	1	2	2	0	2	0.163																								1	1	1	2	0	2	0.163
	0	0	2	2	0	2	0.049																								1	0	1	2	0	2	0.049
7123.21	1	2	0	2	0	2	0.821	0.832																						7890.58	2	1	0	2	1	2	0.893	0.893
	1	2	0	2	0	2	0.821																								2	1	0	2	1	2	0.893
	1	1	1	2	1	2	0.067																								2	0	1	2	0	2	0.053
	0	0	3	2	1	2	0.023																								2	0	1	2	2	0	0.005
7211.83	1	2	0	2	2	0	0.982	0.997																						8163.66	2	0	1	2	0	2	0.805	0.809
	1	2	0	2	2	0	0.982																								2	0	1	2	0	2	0.805
	1	2	0	2	0	2	0.015																								2	1	0	2	1	2	0.056
	2	1	0	2	0	2	0																								2	0	0	2	1	2	0.027
7333.29	1	1	1	2	1	2	0.6	0.6																						8249.64	2	0	1	2	2	0	0.978	0.979
	1	1	1	2	1	2	0.6																								2	0	1	2	2	0	0.978
	1	0	2	2	0	2	0.158																								2	1	0	2	1	2	0.006
	1	2	0	2	0	2	0.077																								2	0	0	2	1	2	0.004
7564.84	1	0	2	2	0	2	0.628	0.669																						8314.28	0	4	0	2	1	2	0.606	0.606
	1	0	2	2	0	2	0.628																								0	4	0	2	1	2	0.606
	1	1	1	2	1	2	0.153																								0	2	1	2	0	2	0.017
	1	0	2	2	2	0	0.04																								0	3	0	2	1	2	0.011
7651.91	1	0	2	2	2	0	0.932	0.937																						8369.59	0	4	0	2	1	2	0.188	0.188
	1	0	2	2	2	0	0.932																								0	4	0	2	1	2	0.188
	1	1	1	2	1	2	0.027																								0	2	1	2	0	2	0.034
	1	0	1	2	1	2	0.011																								0	3	0	2	1	2	0.019
7888.76	2	1	0	2	0	2	0.877	0.892
	2	1	0	2	0	2	0.877
	2	0	1	2	1	2	0.057
	2	1	0	2	2	0	0.015
7982.72	2	1	0	2	2	0	0.978	0.998
	2	1	0	2	2	0	0.978
	2	1	0	2	0	2	0.019
	1	1	0	2	2	0	0
8171.95	2	0	1	2	1	2	0.79	0.79
	2	0	1	2	1	2	0.79
	2	1	0	2	0	2	0.06
	2	0	0	2	0	2	0.029
8305.64	0	4	0	2	0	2	0.554	0.554
	0	4	0	2	0	2	0.554
	0	3	0	2	0	2	0.014
	0	2	1	2	1	2	0.014

## Sheet: J=3
A1 symmetry										A2 symmetry										B1 symmetry										B2 symmetry
Erovib	n1	n2	n3	J	Ka	Kc	RRD^2	FullVib		Erovib	n1	n2	n3	J	Ka	Kc	RRD^2	FullVib		Erovib	n1	n2	n3	J	Ka	Kc	RRD^2	FullVib		Erovib	n1	n2	n3	J	Ka	Kc	RRD^2	FullVib
354.78	0	0	0	3	2	2	0.959	0.959		251.38	0	0	0	3	0	3	0.584	0.913		254.02	0	0	0	3	1	3	0.911	0.911		326.16	0	0	0	3	1	2	0.591	0.964
	0	0	0	3	2	2	0.959				0	0	0	3	0	3	0.584				0	0	0	3	1	3	0.911				0	0	0	3	1	2	0.591
	0	0	1	3	1	2	0.039				0	0	0	3	2	1	0.329				0	0	1	3	2	1	0.048				0	0	0	3	3	0	0.373
	0	0	2	3	2	2	0.001				0	0	1	3	1	3	0.08				0	0	1	3	0	3	0.034				0	0	1	3	2	2	0.034
2539.44	0	1	0	3	2	2	0.782	0.782		376.36	0	0	0	3	2	1	0.614	0.983		458.36	0	0	0	3	3	1	0.991	0.991		459.85	0	0	0	3	3	0	0.623	0.993
	0	1	0	3	2	2	0.782				0	0	0	3	2	1	0.614				0	0	0	3	3	1	0.991				0	0	0	3	3	0	0.623
	0	0	1	3	1	2	0.152				0	0	0	3	0	3	0.368				0	0	1	3	2	1	0.006				0	0	0	3	1	2	0.371
	0	1	1	3	1	2	0.027				0	0	1	3	3	1	0.014				0	0	1	3	0	3	0.002				0	0	1	3	2	2	0.005
2664.14	0	0	1	3	3	0	0.43	0.773		2415.42	0	1	0	3	0	3	0.377	0.644		2416.61	0	1	0	3	1	3	0.64	0.64		2520.3	0	1	0	3	1	2	0.556	0.825
	0	0	1	3	3	0	0.43				0	1	0	3	0	3	0.377				0	1	0	3	1	3	0.64				0	1	0	3	1	2	0.556
	0	0	1	3	1	2	0.343				0	1	0	3	2	1	0.267				0	0	1	3	2	1	0.119				0	1	0	3	3	0	0.269
	0	1	0	3	2	2	0.145				0	0	1	3	1	3	0.228				0	0	1	3	0	3	0.113				0	0	1	3	2	2	0.128
2820.69	0	0	1	3	3	0	0.547	0.93		2580.29	0	1	0	3	2	1	0.53	0.942		2610.59	0	0	1	3	0	3	0.481	0.55		2656.33	0	1	0	3	3	0	0.724	0.964
	0	0	1	3	3	0	0.547				0	1	0	3	2	1	0.53				0	0	1	3	0	3	0.481				0	1	0	3	3	0	0.724
	0	0	1	3	1	2	0.383				0	1	0	3	0	3	0.412				0	1	0	3	1	3	0.248				0	1	0	3	1	2	0.24
	0	1	0	3	2	2	0.036				0	0	1	3	3	1	0.042				0	0	2	3	1	3	0.084				0	0	1	3	2	2	0.029
3339.84	1	0	0	3	2	2	0.954	0.954		2618.45	0	0	1	3	1	3	0.506	0.51		2651.46	0	1	0	3	3	1	0.896	0.908		2710.15	0	0	1	3	2	2	0.715	0.715
	1	0	0	3	2	2	0.954				0	0	1	3	1	3	0.506				0	1	0	3	3	1	0.896				0	0	1	3	2	2	0.715
	1	0	1	3	1	2	0.037				0	1	0	3	0	3	0.157				0	0	1	3	2	1	0.068				0	1	0	3	1	2	0.168
	0	0	1	3	1	2	0.004				0	1	0	3	2	1	0.117				0	1	0	3	1	3	0.012				0	0	2	3	1	2	0.055
4632.49	0	2	0	3	2	2	0.803	0.803		2820.71	0	0	1	3	3	1	0.918	0.918		2717.21	0	0	1	3	2	1	0.573	0.835		3317.05	1	0	0	3	1	2	0.613	0.959
	0	2	0	3	2	2	0.803				0	0	1	3	3	1	0.918				0	0	1	3	2	1	0.573				1	0	0	3	1	2	0.613
	0	1	1	3	1	2	0.127				0	1	0	3	2	1	0.035				0	0	1	3	0	3	0.263				1	0	0	3	3	0	0.346
	0	2	1	3	1	2	0.028				0	0	0	3	2	1	0.012				0	1	0	3	3	1	0.086				1	0	1	3	2	2	0.033
4753.91	0	1	1	3	1	2	0.348	0.64		3241.25	1	0	0	3	0	3	0.551	0.903		3243.02	1	0	0	3	1	3	0.902	0.902		3436.85	1	0	0	3	3	0	0.649	0.992
	0	1	1	3	1	2	0.348				1	0	0	3	0	3	0.551				1	0	0	3	1	3	0.902				1	0	0	3	3	0	0.649
	0	1	1	3	3	0	0.292				1	0	0	3	2	1	0.352				1	0	1	3	2	1	0.046				1	0	0	3	1	2	0.343
	0	0	2	3	2	2	0.143				1	0	1	3	1	3	0.075				1	0	1	3	0	3	0.032				1	0	1	3	2	2	0.004
4933.1	0	1	1	3	3	0	0.683	0.808		3363.9	1	0	0	3	2	1	0.585	0.981		3434.9	1	0	0	3	3	1	0.988	0.988		4612.82	0	2	0	3	1	2	0.538	0.804
	0	1	1	3	3	0	0.683				1	0	0	3	2	1	0.585				1	0	0	3	3	1	0.988				0	2	0	3	1	2	0.538
	0	0	2	3	2	2	0.128				1	0	0	3	0	3	0.397				1	0	1	3	2	1	0.005				0	2	0	3	3	0	0.266
	0	1	1	3	1	2	0.125				1	0	1	3	3	1	0.014				1	0	1	3	0	3	0.002				0	1	1	3	2	2	0.129
5004.06	0	0	2	3	2	2	0.52	0.52		4507.28	0	2	0	3	0	3	0.344	0.586		4508.51	0	2	0	3	1	3	0.585	0.585		4742.11	0	2	0	3	3	0	0.69	0.984
	0	0	2	3	2	2	0.52				0	2	0	3	0	3	0.344				0	2	0	3	1	3	0.585				0	2	0	3	3	0	0.69
	0	1	1	3	1	2	0.287				0	2	0	3	2	1	0.242				0	1	1	3	2	1	0.14				0	2	0	3	1	2	0.294
	0	0	3	3	1	2	0.056				0	1	1	3	1	3	0.241				0	1	1	3	0	3	0.103				0	0	2	3	1	2	0.008
5373.84	1	1	0	3	2	2	0.861	0.861		4646.46	0	1	1	3	1	3	0.247	0.251		4643.81	0	1	1	3	0	3	0.206	0.271		4785.04	0	1	1	3	2	2	0.5	0.5
	1	1	0	3	2	2	0.861				0	1	1	3	1	3	0.247				0	2	0	3	1	3	0.216				0	1	1	3	2	2	0.5
	1	0	1	3	1	2	0.087				0	2	0	3	2	1	0.157				0	1	1	3	0	3	0.206				0	0	2	3	1	2	0.203
	1	1	1	3	1	2	0.025				0	0	2	3	0	3	0.11				0	0	2	3	1	3	0.19				0	2	0	3	1	2	0.09
5568.48	1	0	1	3	1	2	0.414	0.827		4669.89	0	2	0	3	2	1	0.461	0.91		4738.33	0	2	0	3	3	1	0.96	0.961		4947.42	0	0	2	3	3	0	0.461	0.673
	1	0	1	3	1	2	0.414				0	2	0	3	2	1	0.461				0	2	0	3	3	1	0.96				0	0	2	3	3	0	0.461
	1	0	1	3	3	0	0.413				0	2	0	3	0	3	0.45				0	0	2	3	3	1	0.009				0	0	2	3	1	2	0.212
	1	1	0	3	2	2	0.073				0	1	1	3	3	1	0.051				0	1	1	3	0	3	0.007				0	1	1	3	2	2	0.193
5710.02	1	0	1	3	3	0	0.573	0.941		4904.48	0	0	2	3	0	3	0.51	0.511		4828.33	0	1	1	3	0	3	0.441	0.863		5106.52	0	0	2	3	3	0	0.489	0.873
	1	0	1	3	3	0	0.573				0	0	2	3	0	3	0.51				0	1	1	3	0	3	0.441				0	0	2	3	3	0	0.489
	1	0	1	3	1	2	0.368				0	1	1	3	1	3	0.164				0	1	1	3	2	1	0.422				0	0	2	3	1	2	0.383
	1	1	0	3	2	2	0.024				0	1	1	3	3	1	0.064				0	0	2	3	3	1	0.05				0	1	1	3	2	2	0.057
6217.29	2	0	0	3	2	2	0.948	0.948		4928.87	0	1	1	3	3	1	0.591	0.661		4919.16	0	0	2	3	1	3	0.365	0.384		5360.45	1	1	0	3	1	2	0.63	0.867
	2	0	0	3	2	2	0.948				0	1	1	3	3	1	0.591				0	0	2	3	1	3	0.365				1	1	0	3	1	2	0.63
	2	0	1	3	1	2	0.035				0	0	2	3	2	1	0.185				0	1	1	3	2	1	0.154				1	1	0	3	3	0	0.237
	1	0	1	3	1	2	0.007				0	1	1	3	1	3	0.071				0	1	1	3	0	3	0.099				1	0	1	3	2	2	0.083
6634.87	0	3	0	3	2	2	0.729	0.729		5004.77	0	0	2	3	2	1	0.441	0.604		5106.87	0	0	2	3	3	1	0.865	0.865		5478.64	1	1	0	3	3	0	0.747	0.989
	0	3	0	3	2	2	0.729				0	0	2	3	2	1	0.441				0	0	2	3	3	1	0.865				1	1	0	3	3	0	0.747
	0	2	1	3	1	2	0.177				0	1	1	3	3	1	0.256				0	1	1	3	2	1	0.052				1	1	0	3	1	2	0.242
	0	1	2	3	2	2	0.022				0	0	2	3	0	3	0.162				0	0	1	3	2	1	0.023				1	0	1	3	2	2	0.004
6712.1	0	2	1	3	3	0	0.372	0.643		5256.4	1	1	0	3	0	3	0.398	0.734		5257.06	1	1	0	3	1	3	0.733	0.734		5606.5	1	0	1	3	2	2	0.774	0.774
	0	2	1	3	3	0	0.372				1	1	0	3	0	3	0.398				1	1	0	3	1	3	0.733				1	0	1	3	2	2	0.774
	0	2	1	3	1	2	0.271				1	1	0	3	2	1	0.337				1	0	1	3	2	1	0.081				1	1	0	3	1	2	0.086
	0	3	0	3	2	2	0.117				1	0	1	3	1	3	0.147				1	0	1	3	0	3	0.067				1	0	2	3	1	2	0.062
6914.7	0	2	1	3	3	0	0.598	0.823		5416.06	1	1	0	3	2	1	0.511	0.952		5472.44	1	1	0	3	3	1	0.951	0.951		6198.83	2	0	0	3	1	2	0.633	0.953
	0	2	1	3	3	0	0.598				1	1	0	3	2	1	0.511				1	1	0	3	3	1	0.951				2	0	0	3	1	2	0.633
	0	2	1	3	1	2	0.226				1	1	0	3	0	3	0.441				1	0	1	3	0	3	0.029				2	0	0	3	3	0	0.32
	0	3	0	3	2	2	0.067				1	0	1	3	3	1	0.03				1	0	1	3	2	1	0.006				2	0	1	3	2	2	0.032
6962.4	0	1	2	3	2	2	0.419	0.419		5515.75	1	0	1	3	1	3	0.571	0.573		5511.07	1	0	1	3	0	3	0.446	0.586		6308.43	2	0	0	3	3	0	0.673	0.99
	0	1	2	3	2	2	0.419				1	0	1	3	1	3	0.571				1	0	1	3	0	3	0.446				2	0	0	3	3	0	0.673
	0	0	3	3	1	2	0.166				1	1	0	3	0	3	0.102				1	1	0	3	1	3	0.166				2	0	0	3	1	2	0.317
	0	2	1	3	1	2	0.136				1	1	0	3	2	1	0.072				1	0	1	3	2	1	0.14				2	0	1	3	2	2	0.003
7156.88	0	0	3	3	3	0	0.465	0.648		5709.73	1	0	1	3	3	1	0.928	0.928		5617.35	1	0	1	3	2	1	0.589	0.903		6614.7	0	3	0	3	1	2	0.453	0.685
	0	0	3	3	3	0	0.465				1	0	1	3	3	1	0.928				1	0	1	3	2	1	0.589				0	3	0	3	1	2	0.453
	0	0	3	3	1	2	0.183				1	1	0	3	2	1	0.024				1	0	1	3	0	3	0.314				0	3	0	3	3	0	0.232
	0	1	2	3	2	2	0.18				1	0	0	3	2	1	0.011				1	0	2	3	3	1	0.027				0	2	1	3	2	2	0.214
7307.9	0	0	3	3	3	0	0.328	0.541		6121.88	2	0	0	3	0	3	0.522	0.891		6123.09	2	0	0	3	1	3	0.89	0.89		6739.15	0	3	0	3	3	0	0.484	0.911
	1	2	0	3	2	2	0.346				2	0	0	3	0	3	0.522				2	0	0	3	1	3	0.89				0	3	0	3	3	0	0.484
	0	0	3	3	3	0	0.328				2	0	0	3	2	1	0.37				2	0	1	3	2	1	0.044				0	3	0	3	1	2	0.427
	0	0	3	3	1	2	0.212				2	0	1	3	1	3	0.072				2	0	1	3	0	3	0.03				0	2	1	3	2	2	0.053
7356.89	1	2	0	3	2	2	0.523	0.523		6243.53	2	0	0	3	2	1	0.56	0.979		6306	2	0	0	3	3	1	0.985	0.985		6775.07	0	2	1	3	2	2	0.411	0.411
	1	2	0	3	2	2	0.523				2	0	0	3	2	1	0.56				2	0	0	3	3	1	0.985				0	2	1	3	2	2	0.411
	0	0	3	3	1	2	0.165				2	0	0	3	0	3	0.42				2	0	1	3	2	1	0.004				0	3	0	3	3	0	0.24
	0	0	3	3	3	0	0.148				2	0	1	3	3	1	0.013				2	0	1	3	0	3	0.002				0	1	2	3	1	2	0.155
7525.66	1	1	1	3	1	2	0.393	0.676		6500.8	0	3	0	3	0	3	0.271	0.452		6502.3	0	3	0	3	1	3	0.458	0.458		6939.22	0	1	2	3	1	2	0.288	0.542
	1	1	1	3	1	2	0.393				0	2	1	3	1	3	0.294				0	3	0	3	1	3	0.458				0	1	2	3	1	2	0.288
	1	1	1	3	3	0	0.283				0	3	0	3	0	3	0.271				0	2	1	3	2	1	0.17				0	1	2	3	3	0	0.253
	1	0	2	3	2	2	0.131				0	3	0	3	2	1	0.181				0	2	1	3	0	3	0.122				0	0	3	3	2	2	0.138
7685.08	1	1	1	3	3	0	0.7	0.919		6627.27	0	3	0	3	2	1	0.294	0.354		6622.25	0	3	0	3	1	3	0.287	0.288		7127.14	0	1	2	3	3	0	0.708	0.811
	1	1	1	3	3	0	0.7				0	3	0	3	2	1	0.294				0	3	0	3	1	3	0.287				0	1	2	3	3	0	0.708
	1	1	1	3	1	2	0.218				0	2	1	3	1	3	0.159				0	2	1	3	0	3	0.209				0	0	3	3	2	2	0.105
	1	0	2	3	2	2	0.032				0	1	1	3	1	3	0.077				0	1	2	3	1	3	0.147				0	1	2	3	1	2	0.103
7798.61	1	0	2	3	2	2	0.609	0.609		6678	0	3	0	3	0	3	0.468	0.811		6738.15	0	3	0	3	3	1	0.95	0.95		7217.68	0	0	3	3	2	2	0.461	0.461
	1	0	2	3	2	2	0.609				0	3	0	3	0	3	0.468				0	3	0	3	3	1	0.95				0	0	3	3	2	2	0.461
	1	1	1	3	1	2	0.175				0	3	0	3	2	1	0.343				0	1	2	3	1	3	0.011				0	1	2	3	1	2	0.243
	1	0	1	3	1	2	0.048				0	2	1	3	3	1	0.079				0	1	2	3	3	1	0.009				0	0	2	3	1	2	0.044
8102.21	2	1	0	3	2	2	0.892	0.892		6812	0	1	2	3	0	3	0.149	0.204		6783.74	0	2	1	3	0	3	0.422	0.753		7334	1	2	0	3	1	2	0.611	0.812
	2	1	0	3	2	2	0.892				0	0	3	3	1	3	0.151				0	2	1	3	0	3	0.422				1	2	0	3	1	2	0.611
	2	0	1	3	1	2	0.056				0	1	2	3	0	3	0.149				0	2	1	3	2	1	0.331				1	2	0	3	3	0	0.2
	1	1	1	3	1	2	0.003				0	2	1	3	1	3	0.122				0	1	2	3	3	1	0.048				1	1	1	3	2	2	0.067
8350.73	2	0	1	3	1	2	0.448	0.836		6915.05	0	2	1	3	3	1	0.8	0.8		6815.71	0	2	1	3	2	1	0.188	0.191		7433.31	1	2	0	3	3	0	0.757	0.988
	2	0	1	3	1	2	0.448				0	2	1	3	3	1	0.8				0	2	1	3	2	1	0.188				1	2	0	3	3	0	0.757
	2	0	1	3	3	0	0.388				0	3	0	3	2	1	0.074				0	1	2	3	1	3	0.167				1	2	0	3	1	2	0.232
	2	1	0	3	2	2	0.044				0	3	0	3	0	3	0.023				0	0	2	3	1	3	0.098				1	0	2	3	1	2	0.001
8481.18	2	0	1	3	3	0	0.596	0.944		7019.81	0	1	2	3	0	3	0.426	0.82		7101.47	0	0	3	3	0	3	0.426	0.449		7553.03	1	1	1	3	2	2	0.592	0.592
	2	0	1	3	3	0	0.596				0	1	2	3	0	3	0.426				0	0	3	3	0	3	0.426				1	1	1	3	2	2	0.592
	2	0	1	3	1	2	0.349				0	1	2	3	2	1	0.395				0	1	2	3	3	1	0.204				1	0	2	3	1	2	0.16
	2	1	0	3	2	2	0.016				0	0	3	3	3	1	0.047				0	1	2	3	1	3	0.061				1	2	0	3	1	2	0.062
8545.56	0	4	0	3	2	2	0.745	0.745		7120.34	0	0	3	3	1	3	0.284	0.295		7123.67	0	1	2	3	3	1	0.392	0.497		7749.93	1	0	2	3	3	0	0.446	0.712
	0	4	0	3	2	2	0.745				0	0	3	3	1	3	0.284				0	1	2	3	3	1	0.392				1	0	2	3	3	0	0.446
	0	2	1	3	1	2	0.033				0	1	2	3	2	1	0.085				0	0	3	3	2	1	0.164				1	0	2	3	1	2	0.265
	0	2	1	3	3	0	0.003				0	1	2	3	0	3	0.076				0	1	2	3	1	3	0.105				1	1	1	3	2	2	0.135
8572.43	0	3	0	3	2	2	0.023	0.023		7235.89	1	2	0	3	2	1	0.313	0.613		7201.42	0	0	3	3	2	1	0.219	0.408		7904.48	1	0	2	3	3	0	0.523	0.88
	0	3	0	3	2	2	0.023				1	2	0	3	2	1	0.313				1	2	0	3	1	3	0.255				1	0	2	3	3	0	0.523
	0	1	2	3	2	2	0.012				1	2	0	3	0	3	0.3				0	0	3	3	2	1	0.219				1	0	2	3	1	2	0.357
	0	2	1	3	1	2	0.009				1	1	1	3	1	3	0.088				0	1	2	3	3	1	0.191				1	1	1	3	2	2	0.049
										7323.2	0	0	3	3	3	1	0.725	0.726		7253.17	1	2	0	3	1	3	0.397	0.397		8093.6	2	1	0	3	1	2	0.69	0.888
											0	0	3	3	3	1	0.725				1	2	0	3	1	3	0.397				2	1	0	3	1	2	0.69
											1	2	0	3	0	3	0.074				0	0	3	3	2	1	0.185				2	1	0	3	3	0	0.198
											0	1	2	3	2	1	0.056				0	1	2	3	3	1	0.079				2	0	1	3	2	2	0.056
										7386.45	1	2	0	3	2	1	0.482	0.843		7417.72	1	1	1	3	0	3	0.234	0.319		8198.78	2	1	0	3	3	0	0.783	0.991
											1	2	0	3	2	1	0.482				1	1	1	3	0	3	0.234				2	1	0	3	3	0	0.783
											1	2	0	3	0	3	0.36				1	0	2	3	1	3	0.157				2	1	0	3	1	2	0.208
											0	0	3	3	3	1	0.086				1	2	0	3	1	3	0.122				2	0	1	3	2	2	0.001
										7421.88	1	1	1	3	1	3	0.328	0.328		7428.48	1	2	0	3	3	1	0.849	0.881		8382.41	2	0	1	3	2	2	0.788	0.788
											1	1	1	3	1	3	0.328				1	2	0	3	3	1	0.849				2	0	1	3	2	2	0.788
											1	2	0	3	0	3	0.127				1	2	0	3	1	3	0.032				2	1	0	3	1	2	0.054
											1	0	2	3	0	3	0.096				1	0	2	3	1	3	0.027				2	0	0	3	1	2	0.027
										7678.53	1	1	1	3	3	1	0.772	0.775		7592.23	1	1	1	3	2	1	0.465	0.877		8515.76	0	4	0	3	1	2	0.278	0.536
											1	1	1	3	3	1	0.772				1	1	1	3	2	1	0.465				0	4	0	3	1	2	0.278
											1	0	2	3	0	3	0.105				1	1	1	3	0	3	0.412				0	4	0	3	3	0	0.258
											1	0	2	3	2	1	0.031				1	0	2	3	3	1	0.053				0	3	0	3	1	2	0.014
										7705.81	1	0	2	3	0	3	0.321	0.374		7712.5	1	0	2	3	1	3	0.359	0.368
											1	0	2	3	0	3	0.321				1	0	2	3	1	3	0.359
											1	1	1	3	1	3	0.208				1	1	1	3	0	3	0.12
											1	0	1	3	1	3	0.065				1	1	1	3	2	1	0.109
										7800.79	1	0	2	3	2	1	0.521	0.77		7904.63	1	0	2	3	3	1	0.865	0.865
											1	0	2	3	2	1	0.521				1	0	2	3	3	1	0.865
											1	0	2	3	0	3	0.249				1	1	1	3	2	1	0.046
											1	1	1	3	3	1	0.085				1	0	1	3	2	1	0.021
										7989.69	2	1	0	3	0	3	0.398	0.785		7990.12	2	1	0	3	1	3	0.782	0.784
											2	1	0	3	0	3	0.398				2	1	0	3	1	3	0.782
											2	1	0	3	2	1	0.387				2	0	1	3	2	1	0.052
											2	0	1	3	1	3	0.094				2	0	1	3	0	3	0.041
										8147.09	2	1	0	3	2	1	0.488	0.957		8191.54	2	1	0	3	3	1	0.968	0.97
											2	1	0	3	2	1	0.488				2	1	0	3	3	1	0.968
											2	1	0	3	0	3	0.469				2	0	1	3	0	3	0.01
											2	0	1	3	3	1	0.022				2	0	1	3	2	1	0.004
										8290.3	2	0	1	3	1	3	0.592	0.593		8287	2	0	1	3	0	3	0.437	0.607
											2	0	1	3	1	3	0.592				2	0	1	3	0	3	0.437
											2	1	0	3	0	3	0.067				2	0	1	3	2	1	0.17
											2	1	0	3	2	1	0.045				2	1	0	3	1	3	0.108
										8404.42	0	4	0	3	0	3	0.199	0.273		8396.7	2	0	1	3	2	1	0.544	0.883
											0	4	0	3	0	3	0.199				2	0	1	3	2	1	0.544
											0	4	0	3	2	1	0.074				2	0	1	3	0	3	0.339
											0	3	0	3	0	3	0.025				0	4	0	3	1	3	0.015
										8475.68	0	4	0	3	2	1	0.215	0.309		8408.58	0	4	0	3	1	3	0.285	0.286
											0	4	0	3	2	1	0.215				0	4	0	3	1	3	0.285
											2	0	1	3	3	1	0.148				0	3	0	3	1	3	0.039
											0	2	1	3	1	3	0.102				2	0	1	3	2	1	0.024
										8481.56	2	0	1	3	3	1	0.783	0.784		8466.93	0	4	0	3	1	3	0.281	0.281
											2	0	1	3	3	1	0.783				0	4	0	3	1	3	0.281
											0	4	0	3	2	1	0.034				0	2	1	3	0	3	0.062
											0	4	0	3	0	3	0.023				0	2	1	3	2	1	0.05

## Sheet: J=4
A1 symmetry										A2 symmetry										B1 symmetry										B2 symmetry
Erovib	n1	n2	n3	J	Ka	Kc	RRD^2	FullVib		Erovib	n1	n2	n3	J	Ka	Kc	RRD^2	FullVib		Erovib	n1	n2	n3	J	Ka	Kc	RRD^2	FullVib		Erovib	n1	n2	n3	J	Ka	Kc	RRD^2	FullVib
402.81	0	0	0	4	0	4	0.848	0.848		531.32	0	0	0	4	2	3	0.641	0.912		516.14	0	0	0	4	1	3	0.92	0.921		403.61	0	0	0	4	1	4	0.619	0.847
	0	0	0	4	0	4	0.848				0	0	0	4	2	3	0.641				0	0	0	4	1	3	0.92				0	0	0	4	1	4	0.619
	0	0	1	4	1	4	0.086				0	0	0	4	4	1	0.272				0	0	1	4	2	3	0.056				0	0	0	4	3	2	0.229
	0	0	1	4	3	2	0.048				0	0	1	4	1	3	0.065				0	0	1	4	4	1	0.016				0	0	1	4	0	4	0.133
581.5	0	0	0	4	2	2	0.961	0.961		778.71	0	0	0	4	4	1	0.708	0.988		654.53	0	0	0	4	3	1	0.971	0.971		645.59	0	0	0	4	3	2	0.684	0.956
	0	0	0	4	2	2	0.961				0	0	0	4	4	1	0.708				0	0	0	4	3	1	0.971				0	0	0	4	3	2	0.684
	0	0	1	4	3	2	0.029				0	0	0	4	2	3	0.281				0	0	1	4	2	3	0.021				0	0	0	4	1	4	0.271
	0	0	1	4	1	4	0.006				0	0	1	4	3	1	0.008				0	0	1	4	4	1	0.006				0	0	1	4	2	2	0.022
779.05	0	0	0	4	4	0	0.989	0.989		2698.36	0	1	0	4	2	3	0.464	0.641		2690.74	0	1	0	4	1	3	0.663	0.666		2540.33	0	1	0	4	1	4	0.361	0.508
	0	0	0	4	4	0	0.989				0	1	0	4	2	3	0.464				0	1	0	4	1	3	0.663				0	1	0	4	1	4	0.361
	0	0	1	4	3	2	0.005				0	0	1	4	1	3	0.211				0	0	1	4	2	3	0.159				0	0	1	4	0	4	0.249
	1	0	0	4	4	0	0.002				0	1	0	4	4	1	0.178				0	0	1	4	4	1	0.05				0	1	0	4	3	2	0.147
2540.03	0	1	0	4	0	4	0.509	0.509		2860.36	0	0	1	4	1	3	0.554	0.637		2853.47	0	1	0	4	3	1	0.914	0.931		2777.18	0	0	1	4	0	4	0.313	0.363
	0	1	0	4	0	4	0.509				0	0	1	4	1	3	0.554				0	1	0	4	3	1	0.914				0	0	1	4	0	4	0.313
	0	0	1	4	1	4	0.17				0	1	0	4	2	3	0.169				0	0	1	4	2	3	0.026				0	1	0	4	3	2	0.172
	0	0	1	4	3	2	0.08				0	0	1	4	3	1	0.084				0	0	1	4	4	1	0.019				0	1	0	4	1	4	0.163
2775.29	0	1	0	4	2	2	0.442	0.583		2965.33	0	1	0	4	4	1	0.746	0.918		2894.34	0	0	1	4	2	3	0.318	0.537		2830.77	0	1	0	4	3	2	0.426	0.776
	0	1	0	4	2	2	0.442				0	1	0	4	4	1	0.746				0	0	1	4	2	3	0.318				0	1	0	4	3	2	0.426
	0	0	1	4	1	4	0.237				0	1	0	4	2	3	0.172				0	1	0	4	1	3	0.243				0	1	0	4	1	4	0.351
	0	1	0	4	0	4	0.14				0	0	1	4	3	1	0.06				0	0	1	4	4	1	0.219				0	0	1	4	2	2	0.119
2788.54	0	1	0	4	2	2	0.404	0.612		3009.74	0	0	1	4	3	1	0.755	0.759		3158.6	0	0	1	4	4	1	0.648	0.907		2915.78	0	0	1	4	2	2	0.727	0.751
	0	1	0	4	2	2	0.404				0	0	1	4	3	1	0.755				0	0	1	4	4	1	0.648				0	0	1	4	2	2	0.727
	0	1	0	4	0	4	0.208				0	1	0	4	2	3	0.123				0	0	1	4	2	3	0.26				0	1	0	4	3	2	0.143
	0	0	1	4	3	2	0.121				0	0	2	4	2	3	0.043				0	1	0	4	3	1	0.044				0	0	2	4	3	2	0.043
2966.82	0	1	0	4	4	0	0.931	0.945		3515.72	1	0	0	4	2	3	0.645	0.902		3505.1	1	0	0	4	1	3	0.908	0.909		3158.54	0	0	1	4	4	0	0.91	0.91
	0	1	0	4	4	0	0.931				1	0	0	4	2	3	0.645				1	0	0	4	1	3	0.908				0	0	1	4	4	0	0.91
	0	0	1	4	3	2	0.031				1	0	0	4	4	1	0.257				1	0	1	4	2	3	0.057				0	1	0	4	3	2	0.032
	0	1	0	4	2	2	0.013				1	0	1	4	1	3	0.061				1	0	1	4	4	1	0.014				0	0	0	4	3	2	0.016
3008.96	0	0	1	4	3	2	0.511	0.713		3743.15	1	0	0	4	4	1	0.717	0.982		3633.98	1	0	0	4	3	1	0.966	0.968		3390.99	1	0	0	4	1	4	0.595	0.832
	0	0	1	4	3	2	0.511				1	0	0	4	4	1	0.717				1	0	0	4	3	1	0.966				1	0	0	4	1	4	0.595
	0	0	1	4	1	4	0.202				1	0	0	4	2	3	0.265				1	0	1	4	2	3	0.016				1	0	0	4	3	2	0.237
	0	1	0	4	2	2	0.101				1	0	1	4	3	1	0.007				1	0	1	4	4	1	0.007				1	0	1	4	0	4	0.125
3390.53	1	0	0	4	0	4	0.833	0.833		4794.63	0	2	0	4	2	3	0.426	0.595		4786.68	0	2	0	4	1	3	0.597	0.599		3622.65	1	0	0	4	3	2	0.666	0.949
	1	0	0	4	0	4	0.833				0	2	0	4	2	3	0.426				0	2	0	4	1	3	0.597				1	0	0	4	3	2	0.666
	1	0	1	4	1	4	0.08				0	1	1	4	1	3	0.19				0	1	1	4	2	3	0.184				1	0	0	4	1	4	0.284
	1	0	1	4	3	2	0.048				0	2	0	4	4	1	0.169				0	1	1	4	4	1	0.047				1	0	1	4	2	2	0.02
3570.31	1	0	0	4	2	2	0.955	0.955		4914.23	0	1	1	4	1	3	0.341	0.362		4929.44	0	2	0	4	3	1	0.154	0.299		4628.3	0	2	0	4	1	4	0.267	0.374
	1	0	0	4	2	2	0.955				0	1	1	4	1	3	0.341				0	0	2	4	1	3	0.159				0	1	1	4	0	4	0.291
	1	0	1	4	3	2	0.027				0	2	0	4	2	3	0.139				0	2	0	4	3	1	0.154				0	2	0	4	1	4	0.267
	1	0	1	4	1	4	0.007				0	0	2	4	2	3	0.108				0	2	0	4	1	3	0.145				0	2	0	4	3	2	0.107
3743.65	1	0	0	4	4	0	0.983	0.984		5047.72	0	2	0	4	4	1	0.709	0.96		4943.14	0	2	0	4	3	1	0.733	0.793		4764.18	0	2	0	4	1	4	0.195	0.289
	1	0	0	4	4	0	0.983				0	2	0	4	4	1	0.709				0	2	0	4	3	1	0.733				0	2	0	4	1	4	0.195
	1	0	1	4	3	2	0.004				0	2	0	4	2	3	0.251				0	0	2	4	1	3	0.066				0	0	1	4	0	4	0.154
	2	0	0	4	4	0	0.004				0	0	2	4	2	3	0.015				0	1	1	4	2	3	0.065				0	2	1	4	0	4	0.142
4628.01	0	2	0	4	0	4	0.374	0.374		5109.86	0	1	1	4	3	1	0.709	0.774		5151.25	0	0	2	4	1	3	0.4	0.59		4922.17	0	2	0	4	3	2	0.562	0.814
	0	2	0	4	0	4	0.374				0	1	1	4	3	1	0.709				0	0	2	4	1	3	0.4				0	2	0	4	3	2	0.562
	0	1	1	4	1	4	0.191				0	0	2	4	2	3	0.09				0	0	2	4	3	1	0.19				0	2	0	4	1	4	0.252
	0	1	1	4	3	2	0.104				0	1	1	4	1	3	0.065				0	1	1	4	2	3	0.143				0	1	1	4	4	0	0.059
4765.17	0	2	0	4	0	4	0.288	0.291		5197.82	0	0	2	4	4	1	0.244	0.399		5258.93	0	1	1	4	4	1	0.511	0.534		5012.18	0	1	1	4	2	2	0.7	0.712
	0	2	0	4	0	4	0.288				0	0	2	4	4	1	0.244				0	1	1	4	4	1	0.511				0	1	1	4	2	2	0.7
	0	0	2	4	0	4	0.11				0	1	1	4	1	3	0.182				0	0	2	4	3	1	0.284				0	0	2	4	3	2	0.077
	0	0	1	4	1	4	0.109				0	0	2	4	2	3	0.155				0	2	0	4	3	1	0.042				0	2	0	4	3	2	0.057
4874.82	0	2	0	4	2	2	0.793	0.797		5457.64	0	0	2	4	4	1	0.589	0.828		5315.43	0	1	1	4	2	3	0.253	0.451		5094.69	0	0	2	4	1	4	0.224	0.235
	0	2	0	4	2	2	0.793				0	0	2	4	4	1	0.589				0	0	2	4	3	1	0.382				0	0	2	4	1	4	0.224
	0	1	1	4	3	2	0.078				0	0	2	4	2	3	0.239				0	1	1	4	2	3	0.253				0	1	1	4	0	4	0.214
	0	1	1	4	1	4	0.043				0	1	1	4	3	1	0.064				0	1	1	4	4	1	0.198				0	2	0	4	1	4	0.116
5048.64	0	2	0	4	4	0	0.966	0.967		5537.25	1	1	0	4	2	3	0.548	0.732		5532.72	1	1	0	4	1	3	0.719	0.737		5260.54	0	1	1	4	4	0	0.511	0.588
	0	2	0	4	4	0	0.966				1	1	0	4	2	3	0.548				1	1	0	4	1	3	0.719				0	1	1	4	4	0	0.511
	0	0	2	4	4	0	0.012				1	1	0	4	4	1	0.184				1	0	1	4	2	3	0.113				0	0	2	4	3	2	0.202
	0	3	0	4	4	0	0.002				1	0	1	4	1	3	0.125				1	1	1	4	2	3	0.038				0	1	1	4	2	2	0.074
5074.09	0	0	2	4	2	2	0.307	0.397		5760.31	1	0	1	4	1	3	0.539	0.595		5684.47	1	1	0	4	3	1	0.912	0.94		5315.3	0	1	1	4	4	0	0.383	0.447
	0	0	2	4	2	2	0.307				1	0	1	4	1	3	0.539				1	1	0	4	3	1	0.912				0	1	1	4	4	0	0.383
	0	1	1	4	3	2	0.289				1	1	0	4	2	3	0.213				1	1	0	4	1	3	0.028				0	0	2	4	3	2	0.263
	0	0	2	4	0	4	0.079				1	0	1	4	3	1	0.056				1	0	1	4	4	1	0.024				0	0	2	4	1	4	0.107
5100.01	0	1	1	4	1	4	0.338	0.363		5777.92	1	1	0	4	4	1	0.764	0.86		5788.65	1	0	1	4	2	3	0.371	0.587		5383.33	1	1	0	4	1	4	0.411	0.605
	0	1	1	4	1	4	0.338				1	1	0	4	4	1	0.764				1	0	1	4	2	3	0.371				1	1	0	4	1	4	0.411
	0	0	2	4	0	4	0.131				1	1	0	4	2	3	0.096				1	0	1	4	4	1	0.217				1	1	0	4	3	2	0.194
	0	2	0	4	0	4	0.078				1	0	1	4	1	3	0.09				1	1	0	4	1	3	0.163				1	0	1	4	0	4	0.168
5206.87	0	0	2	4	2	2	0.512	0.579		5899.1	1	0	1	4	3	1	0.832	0.833		6033.45	1	0	1	4	4	1	0.66	0.912		5653.68	1	1	0	4	3	2	0.628	0.734
	0	0	2	4	2	2	0.512				1	0	1	4	3	1	0.832				1	0	1	4	4	1	0.66				1	1	0	4	3	2	0.628
	0	1	1	4	3	2	0.211				1	1	0	4	2	3	0.054				1	0	1	4	2	3	0.252				1	1	0	4	1	4	0.106
	0	0	2	4	4	0	0.066				1	0	2	4	2	3	0.043				1	1	0	4	3	1	0.033				1	0	1	4	0	4	0.07
5382.64	1	1	0	4	0	4	0.605	0.608		6391.34	2	0	0	4	2	3	0.647	0.889		6383.79	2	0	0	4	1	3	0.89	0.894		5677.4	1	1	0	4	1	4	0.352	0.359
	1	1	0	4	0	4	0.605				2	0	0	4	2	3	0.647				2	0	0	4	1	3	0.89				1	1	0	4	1	4	0.352
	1	0	1	4	1	4	0.11				2	0	0	4	4	1	0.242				2	0	1	4	2	3	0.057				1	0	1	4	0	4	0.31
	1	0	1	4	3	2	0.061				2	0	1	4	1	3	0.059				2	0	1	4	4	1	0.013				1	0	2	4	1	4	0.071
5458.01	0	0	2	4	4	0	0.832	0.833		6603.99	2	0	0	4	4	1	0.726	0.976		6506.68	2	0	0	4	3	1	0.957	0.966		5817.04	1	0	1	4	2	2	0.815	0.827
	0	0	2	4	4	0	0.832				2	0	0	4	4	1	0.726				2	0	0	4	3	1	0.957				1	0	1	4	2	2	0.815
	0	1	1	4	3	2	0.046				2	0	0	4	2	3	0.251				2	0	1	4	2	3	0.013				1	1	0	4	3	2	0.059
	0	0	1	4	3	2	0.03				2	0	1	4	3	1	0.006				2	0	0	4	1	3	0.009				1	0	2	4	3	2	0.049
5622.4	1	1	0	4	2	2	0.844	0.849		6795.52	0	3	0	4	2	3	0.339	0.484		6785.93	0	3	0	4	1	3	0.451	0.451		6033.44	1	0	1	4	4	0	0.915	0.915
	1	1	0	4	2	2	0.844				0	3	0	4	2	3	0.339				0	3	0	4	1	3	0.451				1	0	1	4	4	0	0.915
	1	0	1	4	1	4	0.053				0	2	1	4	1	3	0.215				0	2	1	4	2	3	0.223				1	1	0	4	3	2	0.023
	1	0	1	4	3	2	0.033				0	3	0	4	4	1	0.145				0	2	1	4	4	1	0.07				1	0	0	4	3	2	0.014
5676.52	1	0	1	4	1	4	0.28	0.367		6885.37	0	2	1	4	1	3	0.292	0.373		6910.13	0	3	0	4	3	1	0.334	0.503		6268.36	2	0	0	4	1	4	0.571	0.813
	1	0	1	4	1	4	0.28				0	2	1	4	1	3	0.292				0	3	0	4	3	1	0.334				2	0	0	4	1	4	0.571
	1	1	0	4	0	4	0.236				0	3	0	4	2	3	0.151				0	2	1	4	4	1	0.17				2	0	0	4	3	2	0.242
	1	0	2	4	0	4	0.138				0	2	1	4	3	1	0.081				0	3	0	4	1	3	0.17				2	0	1	4	0	4	0.119
5777.4	1	1	0	4	4	0	0.963	0.977		7036.67	0	3	0	4	4	1	0.58	0.903		6958.74	0	3	0	4	3	1	0.475	0.593		6493.05	2	0	0	4	3	2	0.648	0.942
	1	1	0	4	4	0	0.963				0	3	0	4	4	1	0.58				0	3	0	4	3	1	0.475				2	0	0	4	3	2	0.648
	1	1	0	4	2	2	0.013				0	3	0	4	2	3	0.323				0	1	2	4	1	3	0.149				2	0	0	4	1	4	0.294
	1	0	1	4	3	2	0.005				0	2	1	4	3	1	0.024				0	3	0	4	1	3	0.118				2	0	1	4	2	2	0.019
5896.86	1	0	1	4	3	2	0.542	0.767		7078.54	0	2	1	4	3	1	0.356	0.437		7101.43	0	1	2	4	1	3	0.212	0.226		6620.82	0	2	1	4	0	4	0.274	0.278
	1	0	1	4	3	2	0.542				0	2	1	4	3	1	0.356				0	1	2	4	1	3	0.212				0	2	1	4	0	4	0.274
	1	0	1	4	1	4	0.225				0	1	2	4	2	3	0.158				0	3	0	4	1	3	0.105				0	3	0	4	1	4	0.197
	1	1	0	4	2	2	0.075				0	0	3	4	1	3	0.122				0	2	1	4	2	3	0.098				0	3	0	4	3	2	0.072
6268.09	2	0	0	4	0	4	0.813	0.813		7121.71	0	2	1	4	3	1	0.286	0.318		7266.58	0	2	1	4	4	1	0.556	0.724		6743.89	0	3	0	4	1	4	0.187	0.281
	2	0	0	4	0	4	0.813				0	2	1	4	3	1	0.286				0	2	1	4	4	1	0.556				0	3	0	4	1	4	0.187
	2	0	1	4	1	4	0.075				0	1	2	4	4	1	0.146				0	2	1	4	2	3	0.168				0	1	1	4	0	4	0.153
	2	0	1	4	3	2	0.047				0	3	0	4	4	1	0.145				0	3	0	4	3	1	0.099				0	3	0	4	3	2	0.094
6449.59	2	0	0	4	2	2	0.946	0.949		7355.77	0	0	3	4	1	3	0.354	0.579		7304.93	0	1	2	4	3	1	0.649	0.715		6902.6	0	3	0	4	3	2	0.391	0.403
	2	0	0	4	2	2	0.946				0	0	3	4	1	3	0.354				0	1	2	4	3	1	0.649				0	3	0	4	3	2	0.391
	2	0	1	4	3	2	0.025				0	0	3	4	3	1	0.225				0	1	2	4	1	3	0.065				0	0	2	4	1	4	0.069
	2	0	1	4	1	4	0.008				0	1	2	4	2	3	0.109				0	2	1	4	2	3	0.057				0	2	1	4	4	0	0.043
6604.69	2	0	0	4	4	0	0.976	0.978		7455.57	0	1	2	4	4	1	0.365	0.372		7407.11	0	0	3	4	4	1	0.189	0.314		6943.59	0	3	0	4	1	4	0.292	0.508
	2	0	0	4	4	0	0.976				0	1	2	4	4	1	0.365				0	0	3	4	4	1	0.189				0	3	0	4	1	4	0.292
	1	0	0	4	4	0	0.004				0	0	3	4	3	1	0.294				0	1	2	4	1	3	0.137				0	3	0	4	3	2	0.216
	2	0	1	4	3	2	0.003				1	2	0	4	2	3	0.048				0	0	3	4	2	3	0.125				0	2	1	4	4	0	0.068
6620.36	0	2	1	4	1	4	0.186	0.279		7490.88	1	2	0	4	2	3	0.375	0.452		7515.71	1	2	0	4	1	3	0.595	0.632		6977.08	0	2	1	4	2	2	0.599	0.6
	0	3	0	4	0	4	0.266				1	2	0	4	2	3	0.375				1	2	0	4	1	3	0.595				0	2	1	4	2	2	0.599
	0	2	1	4	1	4	0.186				0	1	2	4	4	1	0.216				1	1	1	4	2	3	0.077				0	3	0	4	1	4	0.068
	0	1	2	4	0	4	0.126				1	2	0	4	4	1	0.077				0	0	3	4	4	1	0.069				0	1	2	4	3	2	0.064
6745.81	0	3	0	4	0	4	0.283	0.293		7566.5	0	0	3	4	3	1	0.252	0.262		7637.41	1	2	0	4	3	1	0.685	0.71		7251.3	0	0	3	4	2	2	0.262	0.323
	0	3	0	4	0	4	0.283				0	0	3	4	3	1	0.252				1	2	0	4	3	1	0.685				0	0	3	4	2	2	0.262
	0	1	1	4	1	4	0.107				0	1	2	4	2	3	0.17				0	0	3	4	4	1	0.093				0	1	2	4	3	2	0.218
	0	1	2	4	0	4	0.099				1	2	0	4	2	3	0.116				1	1	1	4	4	1	0.057				0	0	3	4	0	4	0.052
6869.1	0	3	0	4	2	2	0.54	0.545		7691.3	1	1	1	4	1	3	0.394	0.402		7698.78	0	0	3	4	4	1	0.303	0.407		7263.82	0	2	1	4	4	0	0.593	0.614
	0	3	0	4	2	2	0.54				1	1	1	4	1	3	0.394				0	0	3	4	4	1	0.303				0	2	1	4	4	0	0.593
	0	2	1	4	1	4	0.1				1	2	0	4	2	3	0.137				1	2	0	4	3	1	0.167				0	3	0	4	3	2	0.066
	0	2	1	4	3	2	0.079				1	0	2	4	2	3	0.109				0	0	3	4	2	3	0.104				0	1	2	4	1	4	0.045
6939.07	0	3	0	4	0	4	0.159	0.291		7727.43	1	2	0	4	4	1	0.765	0.951		7710.33	1	1	1	4	2	3	0.147	0.246		7286.31	0	2	1	4	4	0	0.218	0.263
	0	3	0	4	0	4	0.159				1	2	0	4	4	1	0.765				0	0	3	4	4	1	0.149				0	2	1	4	4	0	0.218
	0	0	2	4	0	4	0.138				1	2	0	4	2	3	0.186				1	1	1	4	2	3	0.147				0	1	2	4	1	4	0.137
	0	3	0	4	2	2	0.13				1	0	2	4	2	3	0.009				1	0	2	4	1	3	0.119				1	1	1	4	0	4	0.071
7037.18	0	3	0	4	4	0	0.882	0.896		7869.44	1	1	1	4	3	1	0.789	0.82		7949.61	1	0	2	4	1	3	0.413	0.565		7371.63	1	2	0	4	1	4	0.193	0.291
	0	3	0	4	4	0	0.882				1	1	1	4	3	1	0.789				1	0	2	4	1	3	0.413				1	2	0	4	1	4	0.193
	0	2	1	4	3	2	0.034				1	0	2	4	2	3	0.046				1	1	1	4	2	3	0.155				0	0	3	4	2	2	0.168
	0	2	1	4	1	4	0.016				1	1	1	4	1	3	0.031				1	0	2	4	3	1	0.152				0	1	2	4	1	4	0.107
7092.46	0	2	1	4	3	2	0.253	0.382		7988.27	1	0	2	4	4	1	0.203	0.396		8005.83	1	1	1	4	4	1	0.717	0.824		7433.33	0	0	3	4	2	2	0.319	0.392
	0	2	1	4	3	2	0.253				1	0	2	4	4	1	0.203				1	1	1	4	4	1	0.717				0	0	3	4	2	2	0.319
	0	3	0	4	2	2	0.174				1	1	1	4	1	3	0.199				1	1	1	4	2	3	0.107				0	1	2	4	3	2	0.17
	0	1	2	4	2	2	0.137				1	0	2	4	2	3	0.193				1	2	0	4	3	1	0.041				0	0	3	4	4	0	0.064
7209	0	1	2	4	2	2	0.538	0.558		8240.49	1	0	2	4	4	1	0.561	0.752		8095.14	1	0	2	4	3	1	0.64	0.642		7541.09	1	2	0	4	3	2	0.128	0.245
	0	1	2	4	2	2	0.538				1	0	2	4	4	1	0.561				1	0	2	4	3	1	0.64				1	1	1	4	0	4	0.143
	0	2	1	4	3	2	0.085				1	0	2	4	2	3	0.192				1	1	1	4	2	3	0.131				1	2	0	4	3	2	0.128
	0	0	3	4	3	2	0.051				1	1	1	4	3	1	0.057				1	0	1	4	2	3	0.045				1	2	0	4	1	4	0.117
7273.6	1	2	0	4	0	4	0.182	0.185		8270.8	2	1	0	4	2	3	0.549	0.714		8266.5	2	1	0	4	1	3	0.737	0.777		7611.96	1	2	0	4	3	2	0.453	0.768
	1	2	0	4	0	4	0.182				2	1	0	4	2	3	0.549				2	1	0	4	1	3	0.737				1	2	0	4	3	2	0.453
	0	0	3	4	1	4	0.102				2	1	0	4	4	1	0.165				2	0	1	4	2	3	0.077				1	2	0	4	1	4	0.315
	1	1	1	4	1	4	0.086				2	0	1	4	1	3	0.071				2	1	0	4	3	1	0.04				0	0	3	4	4	0	0.107
7385.93	1	2	0	4	0	4	0.35	0.354		8484.45	2	1	0	4	4	1	0.723	0.951		8412.5	2	1	0	4	3	1	0.893	0.94		7699.35	0	0	3	4	4	0	0.679	0.68
	1	2	0	4	0	4	0.35				2	1	0	4	4	1	0.723				2	1	0	4	3	1	0.893				0	0	3	4	4	0	0.679
	0	0	3	4	1	4	0.095				2	1	0	4	2	3	0.228				2	1	0	4	1	3	0.047				1	2	0	4	3	2	0.071
	0	1	2	4	0	4	0.059				2	0	1	4	1	3	0.012				2	0	1	4	4	1	0.023				0	1	2	4	3	2	0.042
7462.38	0	1	2	4	4	0	0.481	0.572		8542.15	2	0	1	4	1	3	0.636	0.656		8560.55	2	0	1	4	2	3	0.39	0.6		7783.69	1	1	1	4	2	2	0.706	0.711
	0	1	2	4	4	0	0.481				2	0	1	4	1	3	0.636				2	0	1	4	2	3	0.39				1	1	1	4	2	2	0.706
	0	0	3	4	3	2	0.16				2	1	0	4	4	1	0.064				2	0	1	4	4	1	0.21				1	0	2	4	3	2	0.069
	0	1	2	4	2	2	0.086				2	1	0	4	2	3	0.04				2	1	0	4	1	3	0.11				1	2	0	4	3	2	0.04
7522.76	0	1	2	4	4	0	0.188	0.221		8669.11	2	0	1	4	3	1	0.837	0.838		8688.01	0	4	0	4	1	3	0.251	0.276		7881.31	1	1	1	4	0	4	0.215	0.22
	0	1	2	4	4	0	0.188				2	0	1	4	3	1	0.837				0	4	0	4	1	3	0.251				1	1	1	4	0	4	0.215
	1	1	1	4	1	4	0.108				2	1	0	4	2	3	0.03				0	3	0	4	1	3	0.05				1	0	2	4	1	4	0.165
	1	2	0	4	2	2	0.101				2	0	0	4	2	3	0.02				0	4	0	4	3	1	0.025				1	0	1	4	0	4	0.083
7554.2	1	2	0	4	0	4	0.192	0.222		8707.33	0	4	0	4	2	3	0.271	0.448		8775.54	0	4	0	4	1	3	0.293	0.467		8005.49	1	1	1	4	4	0	0.837	0.858
	1	2	0	4	0	4	0.192				0	4	0	4	2	3	0.271				0	4	0	4	1	3	0.293				1	1	1	4	4	0	0.837
	0	0	3	4	3	2	0.122				0	4	0	4	4	1	0.177				0	4	0	4	3	1	0.174				1	0	2	4	3	2	0.034
	0	1	2	4	4	0	0.079				0	2	1	4	1	3	0.032				0	2	1	4	2	3	0.088				1	2	0	4	3	2	0.022
7610.21	1	2	0	4	2	2	0.69	0.699		8736.91	0	2	1	4	1	3	0.062	0.064		8793.69	2	0	1	4	4	1	0.645	0.877		8092.76	1	0	2	4	3	2	0.33	0.505
	1	2	0	4	2	2	0.69				0	2	1	4	1	3	0.062				2	0	1	4	4	1	0.645				1	0	2	4	3	2	0.33
	0	1	2	4	4	0	0.067				0	4	0	4	2	3	0.038				2	0	1	4	2	3	0.232				1	0	2	4	1	4	0.175
	0	0	3	4	3	2	0.045				0	4	0	4	4	1	0.024				2	1	0	4	3	1	0.024				1	1	1	4	2	2	0.095
7729.02	1	2	0	4	4	0	0.954	0.967																						8121.64	2	1	0	4	1	4	0.377	0.583
	1	2	0	4	4	0	0.954																								2	1	0	4	1	4	0.377
	1	2	0	4	2	2	0.012																								2	1	0	4	3	2	0.206
	0	1	2	4	4	0	0.007																								2	0	1	4	0	4	0.091
7843.32	1	1	1	4	3	2	0.417	0.499																						8380.22	2	1	0	4	3	2	0.614	0.87
	1	1	1	4	3	2	0.417																								2	1	0	4	3	2	0.614
	1	0	2	4	2	2	0.177																								2	1	0	4	1	4	0.256
	1	1	1	4	1	4	0.083																								2	0	1	4	2	2	0.034
7882.63	1	1	1	4	1	4	0.284	0.284																						8442.96	2	0	1	4	0	4	0.382	0.385
	1	1	1	4	1	4	0.284																								2	0	1	4	0	4	0.382
	1	0	2	4	0	4	0.151																								2	1	0	4	1	4	0.158
	1	0	1	4	1	4	0.048																								2	0	0	4	1	4	0.051
8000.12	1	0	2	4	2	2	0.633	0.676																						8526.51	0	4	0	4	1	4	0.096	0.116
	1	0	2	4	2	2	0.633																								0	4	0	4	1	4	0.096
	1	1	1	4	3	2	0.123																								0	3	0	4	1	4	0.054
	1	0	2	4	4	0	0.042																								0	4	0	4	3	2	0.02
8118.12	2	1	0	4	0	4	0.664	0.67																						8587.07	0	4	0	4	1	4	0.16	0.201
	2	1	0	4	0	4	0.664																								0	4	0	4	1	4	0.16
	2	0	1	4	1	4	0.068																								0	2	1	4	0	4	0.147
	2	0	1	4	3	2	0.04																								2	0	1	4	2	2	0.129
8242.89	1	0	2	4	4	0	0.832	0.832																						8598.68	2	0	1	4	2	2	0.702	0.709
	1	0	2	4	4	0	0.832																								2	0	1	4	2	2	0.702
	1	1	1	4	3	2	0.043																								0	4	0	4	1	4	0.03
	1	0	1	4	3	2	0.027																								2	1	0	4	3	2	0.028
8357.71	2	1	0	4	2	2	0.846	0.865																						8769.51	0	4	0	4	3	2	0.382	0.385
	2	1	0	4	2	2	0.846																								0	4	0	4	3	2	0.382
	2	0	1	4	1	4	0.036																								0	1	2	4	1	4	0.057
	2	0	1	4	3	2	0.023																								0	3	0	4	1	4	0.016
8443.55	2	0	1	4	1	4	0.291	0.384
	2	0	1	4	1	4	0.291
	2	1	0	4	0	4	0.153
	2	0	1	4	3	2	0.092
8488.19	2	1	0	4	4	0	0.95	0.974
	2	1	0	4	4	0	0.95
	2	1	0	4	2	2	0.024
	1	1	0	4	4	0	0.003
8525.09	0	4	0	4	0	4	0.103	0.106
	0	4	0	4	0	4	0.103
	0	3	0	4	0	4	0.072
	0	1	2	4	0	4	0.026
8593.27	0	4	0	4	0	4	0.264	0.27
	0	4	0	4	0	4	0.264
	0	2	1	4	1	4	0.128
	0	2	1	4	3	2	0.048
8665.69	2	0	1	4	3	2	0.537	0.773
	2	0	1	4	3	2	0.537
	2	0	1	4	1	4	0.236
	2	1	0	4	2	2	0.055
8741.06	0	4	0	4	2	2	0.329	0.377
	0	4	0	4	2	2	0.329
	0	4	0	4	0	4	0.047
	0	1	2	4	0	4	0.047

## Sheet: J=5
A1 symmetry										A2 symmetry										B1 symmetry										B2 symmetry
Erovib	n1	n2	n3	J	Ka	Kc	RRD^2	FullVib		Erovib	n1	n2	n3	J	Ka	Kc	RRD^2	FullVib		Erovib	n1	n2	n3	J	Ka	Kc	RRD^2	FullVib		Erovib	n1	n2	n3	J	Ka	Kc	RRD^2	FullVib
745.05	0	0	0	5	2	4	0.85	0.851		586.15	0	0	0	5	0	5	0.514	0.772		586.37	0	0	0	5	1	5	0.771	0.771		738.73	0	0	0	5	1	4	0.525	0.857
	0	0	0	5	2	4	0.85				0	0	0	5	0	5	0.514				0	0	0	5	1	5	0.771				0	0	0	5	1	4	0.525
	0	0	1	5	1	4	0.103				0	0	1	5	1	5	0.191				0	0	1	5	0	5	0.107				0	0	0	5	3	2	0.299
	0	0	1	5	5	0	0.017				0	0	0	5	4	1	0.155				0	0	1	5	4	1	0.048				0	0	1	5	2	4	0.124
1012.36	0	0	0	5	4	2	0.949	0.949		833.25	0	0	0	5	2	3	0.553	0.926		876.57	0	0	0	5	3	3	0.909	0.91		904.13	0	0	0	5	3	2	0.523	0.949
	0	0	0	5	4	2	0.949				0	0	0	5	2	3	0.553				0	0	0	5	3	3	0.909				0	0	0	5	3	2	0.523
	0	0	1	5	3	2	0.023				0	0	0	5	0	5	0.278				0	0	1	5	4	1	0.053				0	0	0	5	5	0	0.294
	0	0	1	5	1	4	0.019				0	0	0	5	4	1	0.095				0	0	1	5	0	5	0.023				0	0	0	5	1	4	0.131
2889.55	0	1	0	5	2	4	0.512	0.512		1015.07	0	0	0	5	4	1	0.637	0.955		1177.42	0	0	0	5	5	1	0.984	0.984		1177.48	0	0	0	5	5	0	0.651	0.984
	0	1	0	5	2	4	0.512				0	0	0	5	4	1	0.637				0	0	0	5	5	1	0.984				0	0	0	5	5	0	0.651
	0	0	1	5	1	4	0.181				0	0	0	5	2	3	0.274				1	0	0	5	5	1	0.005				0	0	0	5	1	4	0.211
	0	0	2	5	2	4	0.079				0	0	0	5	0	5	0.044				0	0	1	5	4	1	0.005				0	0	0	5	3	2	0.122
3094.86	0	0	1	5	3	2	0.372	0.481		2694.08	0	1	0	5	0	5	0.255	0.399		2694.15	0	1	0	5	1	5	0.399	0.399		2887.01	0	1	0	5	1	4	0.346	0.52
	0	0	1	5	3	2	0.372				0	1	0	5	0	5	0.255				0	1	0	5	1	5	0.399				0	1	0	5	1	4	0.346
	0	1	0	5	2	4	0.267				0	0	1	5	1	5	0.225				0	0	1	5	0	5	0.138				0	0	1	5	2	4	0.241
	0	0	1	5	1	4	0.108				0	1	0	5	4	1	0.085				0	0	2	5	1	5	0.127				0	1	0	5	3	2	0.144
3195.14	0	1	0	5	4	2	0.781	0.81		2975.46	0	1	0	5	2	3	0.143	0.391		2975.08	0	1	0	5	1	5	0.358	0.375		3099.97	0	1	0	5	3	2	0.292	0.736
	0	1	0	5	4	2	0.781				0	0	1	5	1	5	0.164				0	1	0	5	1	5	0.358				0	1	0	5	3	2	0.292
	0	0	1	5	1	4	0.07				0	1	0	5	2	3	0.143				0	0	1	5	0	5	0.207				0	1	0	5	5	0	0.235
	0	0	1	5	3	2	0.048				0	1	0	5	4	1	0.128				0	0	2	5	1	5	0.117				0	1	0	5	1	4	0.209
3246.07	0	0	1	5	5	0	0.322	0.68		3024.51	0	1	0	5	0	5	0.39	0.702		3049.52	0	1	0	5	3	3	0.624	0.65		3123.13	0	1	0	5	3	2	0.351	0.452
	0	0	1	5	5	0	0.322				0	1	0	5	0	5	0.39				0	1	0	5	3	3	0.624				0	1	0	5	3	2	0.351
	0	0	1	5	3	2	0.278				0	1	0	5	2	3	0.263				0	0	1	5	4	1	0.105				0	0	1	5	2	4	0.286
	0	1	0	5	4	2	0.117				0	0	1	5	3	3	0.137				0	0	1	5	2	3	0.057				0	1	0	5	1	4	0.094
3578.23	0	0	1	5	5	0	0.595	0.894		3203.71	0	1	0	5	4	1	0.514	0.909		3163.27	0	0	1	5	2	3	0.533	0.672		3354.78	0	1	0	5	5	0	0.701	0.956
	0	0	1	5	5	0	0.595				0	1	0	5	4	1	0.514				0	0	1	5	2	3	0.533				0	1	0	5	5	0	0.701
	0	0	1	5	1	4	0.188				0	1	0	5	2	3	0.376				0	1	0	5	3	3	0.187				0	1	0	5	1	4	0.167
	0	0	1	5	3	2	0.111				0	0	1	5	5	1	0.042				0	0	1	5	0	5	0.137				0	1	0	5	3	2	0.087
3728.03	1	0	0	5	2	4	0.832	0.832		3241.53	0	0	1	5	3	3	0.55	0.561		3354.5	0	1	0	5	5	1	0.943	0.949		3389.13	0	0	1	5	4	2	0.719	0.719
	1	0	0	5	2	4	0.832				0	0	1	5	3	3	0.55				0	1	0	5	5	1	0.943				0	0	1	5	4	2	0.719
	1	0	1	5	1	4	0.1				0	1	0	5	4	1	0.088				0	0	1	5	4	1	0.021				0	1	0	5	3	2	0.063
	1	0	1	5	5	0	0.016				0	1	0	5	2	3	0.077				0	2	0	5	5	1	0.006				0	1	0	5	1	4	0.061
3977.76	1	0	0	5	4	2	0.938	0.939		3571.46	1	0	0	5	0	5	0.48	0.743		3388.84	0	0	1	5	4	1	0.498	0.733		3724.29	1	0	0	5	1	4	0.544	0.837
	1	0	0	5	4	2	0.938				1	0	0	5	0	5	0.48				0	0	1	5	4	1	0.498				1	0	0	5	1	4	0.544
	1	0	1	5	3	2	0.023				1	0	1	5	1	5	0.179				0	0	1	5	2	3	0.193				1	0	0	5	3	2	0.249
	1	0	1	5	1	4	0.016				1	0	0	5	4	1	0.152				0	1	0	5	3	3	0.08				1	0	1	5	2	4	0.12
4983.3	0	2	0	5	2	4	0.383	0.383		3578.32	0	0	1	5	5	1	0.884	0.884		3571.63	1	0	0	5	1	5	0.75	0.75		3887.15	1	0	0	5	3	2	0.572	0.942
	0	2	0	5	2	4	0.383				0	0	1	5	5	1	0.884				1	0	0	5	1	5	0.75				1	0	0	5	3	2	0.572
	0	1	1	5	1	4	0.222				0	1	0	5	4	1	0.031				1	0	1	5	0	5	0.099				1	0	0	5	5	0	0.266
	0	0	2	5	2	4	0.088				0	0	0	5	4	1	0.02				1	0	1	5	4	1	0.047				1	0	0	5	1	4	0.105
5106.05	0	2	0	5	2	4	0.263	0.264		3821.85	1	0	0	5	2	3	0.497	0.911		3853.89	1	0	0	5	3	3	0.896	0.896		4126.62	1	0	0	5	5	0	0.66	0.971
	0	2	0	5	2	4	0.263				1	0	0	5	2	3	0.497				1	0	0	5	3	3	0.896				1	0	0	5	5	0	0.66
	0	1	1	5	3	2	0.113				1	0	0	5	0	5	0.302				1	0	1	5	4	1	0.05				1	0	0	5	1	4	0.2
	0	0	2	5	2	4	0.108				1	0	0	5	4	1	0.112				1	0	1	5	0	5	0.025				1	0	0	5	3	2	0.111
5278.19	0	2	0	5	4	2	0.827	0.827		3981.73	1	0	0	5	4	1	0.601	0.948		4126.51	1	0	0	5	5	1	0.971	0.971		4980.71	0	2	0	5	1	4	0.252	0.384
	0	2	0	5	4	2	0.827				1	0	0	5	4	1	0.601				1	0	0	5	5	1	0.971				0	1	1	5	2	4	0.285
	0	1	1	5	5	0	0.039				1	0	0	5	2	3	0.313				2	0	0	5	5	1	0.01				0	2	0	5	1	4	0.252
	0	1	1	5	3	2	0.035				1	0	0	5	0	5	0.034				0	0	0	5	5	1	0.005				0	2	0	5	3	2	0.111
5339.6	0	1	1	5	3	2	0.507	0.723		4770.87	0	1	1	5	1	5	0.266	0.267		4770.94	0	1	1	5	0	5	0.156	0.267		5113.64	0	2	0	5	1	4	0.211	0.281
	0	1	1	5	3	2	0.507				0	1	1	5	1	5	0.266				0	2	0	5	1	5	0.221				0	2	0	5	1	4	0.211
	0	1	1	5	5	0	0.201				0	2	0	5	0	5	0.142				0	1	1	5	0	5	0.156				0	0	1	5	2	4	0.146
	0	0	2	5	4	2	0.065				0	0	3	5	1	5	0.065				0	0	2	5	1	5	0.117				0	2	1	5	2	4	0.126
5430.85	0	0	2	5	2	4	0.22	0.295		4919.58	0	2	0	5	0	5	0.178	0.297		4919.23	0	2	0	5	1	5	0.296	0.296		5193.96	0	2	0	5	3	2	0.507	0.759
	0	0	2	5	2	4	0.22				0	0	1	5	1	5	0.208				0	2	0	5	1	5	0.296				0	2	0	5	3	2	0.507
	0	1	1	5	1	4	0.165				0	2	1	5	1	5	0.195				0	0	1	5	0	5	0.139				0	2	0	5	5	0	0.2
	0	2	0	5	2	4	0.131				0	2	0	5	0	5	0.178				0	2	1	5	0	5	0.105				0	1	1	5	4	2	0.114
5668.93	0	0	2	5	4	2	0.411	0.411		5115.6	0	2	0	5	2	3	0.331	0.618		5142.05	0	2	0	5	3	3	0.622	0.622		5393.96	0	0	2	5	3	2	0.458	0.51
	0	0	2	5	4	2	0.411				0	2	0	5	2	3	0.331				0	2	0	5	3	3	0.622				0	0	2	5	3	2	0.458
	0	1	1	5	5	0	0.341				0	2	0	5	0	5	0.205				0	1	1	5	4	1	0.105				0	1	1	5	2	4	0.109
	0	2	0	5	4	2	0.031				0	1	1	5	3	3	0.2				0	1	1	5	0	5	0.09				0	2	0	5	1	4	0.075
5711.34	0	1	1	5	5	0	0.279	0.58		5271.51	0	2	0	5	4	1	0.275	0.277		5234.55	0	1	1	5	2	3	0.35	0.487		5426.76	0	2	0	5	5	0	0.619	0.937
	0	1	1	5	5	0	0.279				0	2	0	5	4	1	0.275				0	1	1	5	2	3	0.35				0	2	0	5	5	0	0.619
	0	1	1	5	1	4	0.183				0	1	1	5	3	3	0.163				0	0	2	5	3	3	0.137				0	2	0	5	1	4	0.199
	0	0	2	5	4	2	0.132				0	0	2	5	0	5	0.14				0	1	1	5	0	5	0.126				0	2	0	5	3	2	0.119
5734.97	1	1	0	5	2	4	0.512	0.515		5287.56	0	2	0	5	2	3	0.356	0.71		5304.37	0	2	0	5	1	5	0.188	0.208		5472.96	0	1	1	5	4	2	0.333	0.429
	1	1	0	5	2	4	0.512				0	2	0	5	2	3	0.356				0	2	0	5	1	5	0.188				0	1	1	5	4	2	0.333
	1	0	1	5	1	4	0.1				0	2	0	5	4	1	0.319				0	1	1	5	0	5	0.121				0	0	2	5	1	4	0.114
	0	0	2	5	4	2	0.07				0	0	2	5	0	5	0.077				0	0	2	5	1	5	0.102				0	1	1	5	2	4	0.096
5986.95	1	0	1	5	3	2	0.326	0.415		5313.35	0	2	0	5	0	5	0.212	0.226		5426.49	0	2	0	5	5	1	0.937	0.937		5554.77	0	0	2	5	5	0	0.306	0.418
	1	0	1	5	3	2	0.326				0	2	0	5	0	5	0.212				0	2	0	5	5	1	0.937				0	0	2	5	5	0	0.306
	1	1	0	5	4	2	0.221				0	1	1	5	1	5	0.125				0	0	2	5	5	1	0.02				0	1	1	5	4	2	0.29
	1	1	0	5	2	4	0.112				0	1	1	5	3	3	0.077				0	3	0	5	5	1	0.005				0	0	2	5	3	2	0.094
6019.44	1	1	0	5	4	2	0.65	0.74		5458.04	0	0	2	5	2	3	0.477	0.559		5477.64	0	1	1	5	2	3	0.405	0.586		5729.85	1	1	0	5	1	4	0.435	0.605
	1	1	0	5	4	2	0.65				0	0	2	5	2	3	0.477				0	1	1	5	2	3	0.405				1	1	0	5	1	4	0.435
	1	0	1	5	1	4	0.113				0	1	1	5	3	3	0.176				0	1	1	5	4	1	0.18				1	0	1	5	2	4	0.165
	1	1	0	5	2	4	0.09				0	2	0	5	2	3	0.081				0	0	2	5	3	3	0.146				1	1	0	5	3	2	0.122
6138.45	1	0	1	5	3	2	0.371	0.767		5538.26	1	1	0	5	0	5	0.295	0.496		5533.94	1	1	0	5	1	5	0.41	0.411		5894.33	0	0	2	5	5	0	0.509	0.773
	1	0	1	5	3	2	0.371				1	1	0	5	0	5	0.295				1	1	0	5	1	5	0.41				0	0	2	5	5	0	0.509
	1	0	1	5	5	0	0.308				1	0	1	5	1	5	0.157				1	0	2	5	1	5	0.076				0	0	2	5	1	4	0.165
	1	0	1	5	1	4	0.087				1	1	0	5	4	1	0.115				1	0	1	5	0	5	0.068				0	0	2	5	3	2	0.099
6435.24	1	0	1	5	5	0	0.6	0.888		5669.37	0	0	2	5	4	1	0.292	0.412		5557.95	0	0	2	5	3	3	0.258	0.315		5944.09	1	1	0	5	3	2	0.519	0.816
	1	0	1	5	5	0	0.6				0	0	2	5	4	1	0.292				0	0	2	5	3	3	0.258				1	1	0	5	3	2	0.519
	1	0	1	5	1	4	0.183				0	1	1	5	5	1	0.258				0	1	1	5	4	1	0.181				1	1	0	5	5	0	0.194
	1	0	1	5	3	2	0.105				0	0	2	5	2	3	0.092				1	1	0	5	1	5	0.088				1	1	0	5	1	4	0.102
6600.85	2	0	0	5	2	4	0.81	0.81		5714.58	0	1	1	5	5	1	0.604	0.625		5857.79	1	1	0	5	3	3	0.22	0.374		6012.47	1	0	1	5	2	4	0.376	0.38
	2	0	0	5	2	4	0.81				0	1	1	5	5	1	0.604				1	0	1	5	0	5	0.229				1	0	1	5	2	4	0.376
	2	0	1	5	1	4	0.099				0	0	2	5	4	1	0.136				1	1	0	5	3	3	0.22				1	1	0	5	3	2	0.136
	2	0	1	5	5	0	0.015				0	0	2	5	2	3	0.052				1	1	0	5	1	5	0.153				1	1	0	5	1	4	0.12
6838.06	2	0	0	5	4	2	0.927	0.929		5853.34	1	1	0	5	2	3	0.28	0.496		5886.52	1	1	0	5	3	3	0.308	0.405		6149.93	1	1	0	5	5	0	0.711	0.96
	2	0	0	5	4	2	0.927				1	1	0	5	2	3	0.28				1	1	0	5	3	3	0.308				1	1	0	5	5	0	0.711
	2	0	1	5	3	2	0.023				1	1	0	5	4	1	0.202				0	0	2	5	5	1	0.208				1	1	0	5	1	4	0.166
	2	0	1	5	1	4	0.014				1	0	1	5	1	5	0.105				1	1	0	5	1	5	0.097				1	1	0	5	3	2	0.083
6983.42	0	3	0	5	2	4	0.28	0.281		5881.45	1	1	0	5	0	5	0.45	0.51		5899.81	0	0	2	5	5	1	0.575	0.576		6264.52	1	0	1	5	4	2	0.745	0.745
	0	3	0	5	2	4	0.28				1	1	0	5	0	5	0.45				0	0	2	5	5	1	0.575				1	0	1	5	4	2	0.745
	0	2	1	5	1	4	0.204				1	0	1	5	1	5	0.111				1	1	0	5	3	3	0.209				1	1	0	5	3	2	0.042
	0	1	2	5	2	4	0.107				1	1	0	5	2	3	0.053				0	0	1	5	4	1	0.033				1	0	2	5	3	2	0.035
7083.67	0	3	0	5	2	4	0.237	0.237		6023.8	1	1	0	5	4	1	0.492	0.921		6065.5	1	0	1	5	2	3	0.532	0.721		6598.59	2	0	0	5	1	4	0.552	0.813
	0	3	0	5	2	4	0.237				1	1	0	5	4	1	0.492				1	0	1	5	2	3	0.532				2	0	0	5	1	4	0.552
	0	2	1	5	3	2	0.137				1	1	0	5	2	3	0.417				1	0	1	5	0	5	0.178				2	0	0	5	3	2	0.21
	0	1	2	5	2	4	0.104				1	0	1	5	5	1	0.036				1	1	0	5	3	3	0.095				2	0	1	5	2	4	0.117
7246.51	0	3	0	5	4	2	0.412	0.456		6129.82	1	0	1	5	3	3	0.587	0.594		6149.73	1	1	0	5	5	1	0.948	0.956		6761.14	2	0	0	5	3	2	0.608	0.934
	0	3	0	5	4	2	0.412				1	0	1	5	3	3	0.587				1	1	0	5	5	1	0.948				2	0	0	5	3	2	0.608
	0	0	2	5	2	4	0.072				1	0	2	5	4	1	0.074				2	1	0	5	5	1	0.009				2	0	0	5	5	0	0.24
	0	2	1	5	3	2	0.067				1	1	0	5	2	3	0.069				1	1	0	5	3	3	0.007				2	0	0	5	1	4	0.086
7275.62	0	2	1	5	3	2	0.19	0.372		6435.14	1	0	1	5	5	1	0.876	0.877		6264.51	1	0	1	5	4	1	0.508	0.768		6974.48	2	0	0	5	5	0	0.668	0.958
	0	3	0	5	4	2	0.252				1	0	1	5	5	1	0.876				1	0	1	5	4	1	0.508				2	0	0	5	5	0	0.668
	0	2	1	5	3	2	0.19				1	1	0	5	4	1	0.024				1	0	1	5	2	3	0.222				2	0	0	5	1	4	0.189
	0	2	1	5	5	0	0.175				1	0	0	5	4	1	0.019				1	1	0	5	3	3	0.059				2	0	0	5	3	2	0.101
7352.66	0	2	1	5	3	2	0.171	0.299		6445.6	2	0	0	5	0	5	0.444	0.714		6445.53	2	0	0	5	1	5	0.723	0.723		6979.44	0	2	1	5	2	4	0.278	0.279
	0	2	1	5	3	2	0.171				2	0	0	5	0	5	0.444				2	0	0	5	1	5	0.723				0	2	1	5	2	4	0.278
	0	3	0	5	2	4	0.154				2	0	1	5	1	5	0.17				2	0	1	5	0	5	0.093				0	3	0	5	1	4	0.163
	0	1	2	5	4	2	0.13				2	0	0	5	4	1	0.162				2	0	1	5	4	1	0.046				0	1	2	5	1	4	0.106
7585.14	0	0	3	5	3	2	0.416	0.478		6698.93	2	0	0	5	2	3	0.445	0.895		6722.9	2	0	0	5	3	3	0.881	0.882		7097.24	0	3	0	5	1	4	0.243	0.327
	0	0	3	5	3	2	0.416				2	0	0	5	2	3	0.445				2	0	0	5	3	3	0.881				0	3	0	5	1	4	0.243
	0	2	1	5	1	4	0.061				2	0	0	5	0	5	0.321				2	0	1	5	4	1	0.048				0	1	1	5	2	4	0.141
	0	1	2	5	2	4	0.051				2	0	0	5	4	1	0.129				2	0	1	5	0	5	0.026				0	3	0	5	5	0	0.075
7657.23	0	0	3	5	1	4	0.089	0.2		6763.72	0	2	1	5	1	5	0.201	0.201		6763.86	0	2	1	5	0	5	0.122	0.201		7185.99	0	3	0	5	3	2	0.295	0.475
	0	1	2	5	4	2	0.14				0	2	1	5	1	5	0.201				0	1	2	5	1	5	0.16				0	3	0	5	3	2	0.295
	1	2	0	5	2	4	0.132				0	3	0	5	0	5	0.097				0	3	0	5	1	5	0.147				0	3	0	5	5	0	0.135
	0	0	3	5	1	4	0.089				0	1	2	5	0	5	0.077				0	2	1	5	0	5	0.122				0	2	1	5	4	2	0.127
7691.55	0	2	1	5	5	0	0.193	0.445		6843.43	2	0	0	5	4	1	0.565	0.942		6883	0	3	0	5	1	5	0.199	0.199		7308.36	0	3	0	5	3	2	0.227	0.307
	0	2	1	5	5	0	0.193				2	0	0	5	4	1	0.565				0	3	0	5	1	5	0.199				0	3	0	5	3	2	0.227
	0	1	2	5	4	2	0.176				2	0	0	5	2	3	0.352				0	1	1	5	0	5	0.128				0	0	2	5	1	4	0.094
	0	2	1	5	3	2	0.173				2	0	1	5	5	1	0.026				0	0	2	5	1	5	0.038				0	3	0	5	1	4	0.061
7703.8	0	2	1	5	5	0	0.276	0.339		6883.62	0	3	0	5	0	5	0.121	0.202		6974.31	2	0	0	5	5	1	0.958	0.959		7403.08	0	3	0	5	5	0	0.471	0.869
	0	2	1	5	5	0	0.276				0	1	1	5	1	5	0.185				2	0	0	5	5	1	0.958				0	3	0	5	5	0	0.471
	1	2	0	5	2	4	0.218				0	3	0	5	0	5	0.121				1	0	0	5	5	1	0.009				0	3	0	5	1	4	0.234
	1	1	1	5	1	4	0.075				0	3	0	5	4	1	0.041				2	0	1	5	4	1	0.004				0	3	0	5	3	2	0.165
7801.25	0	0	3	5	5	0	0.23	0.278		7055.96	0	3	0	5	2	3	0.162	0.26		7063.54	0	3	0	5	1	5	0.168	0.242		7483.07	0	1	2	5	3	2	0.281	0.308
	0	0	3	5	5	0	0.23				0	3	0	5	2	3	0.162				0	3	0	5	1	5	0.168				0	2	1	5	4	2	0.293
	0	1	2	5	4	2	0.16				0	0	2	5	0	5	0.106				0	0	2	5	1	5	0.145				0	1	2	5	3	2	0.281
	1	2	0	5	2	4	0.059				0	2	1	5	3	3	0.098				0	3	0	5	3	3	0.073				0	3	0	5	5	0	0.103
7887.02	1	2	0	5	2	4	0.211	0.238		7143.97	0	3	0	5	0	5	0.304	0.427		7161.07	0	3	0	5	3	3	0.549	0.58		7547.74	0	1	2	5	5	0	0.278	0.494
	1	2	0	5	2	4	0.211				0	3	0	5	0	5	0.304				0	3	0	5	3	3	0.549				0	1	2	5	5	0	0.278
	1	0	2	5	2	4	0.109				0	2	1	5	3	3	0.171				0	2	1	5	4	1	0.119				0	1	2	5	3	2	0.214
	1	1	1	5	3	2	0.105				0	3	0	5	2	3	0.123				0	3	0	5	1	5	0.031				0	2	1	5	4	2	0.149
7966.16	1	2	0	5	4	2	0.81	0.831		7253.01	0	3	0	5	4	1	0.526	0.637		7199.69	0	2	1	5	2	3	0.355	0.511		7629.45	0	0	3	5	2	4	0.137	0.162
	1	2	0	5	4	2	0.81				0	3	0	5	4	1	0.526				0	2	1	5	2	3	0.355				0	0	3	5	2	4	0.137
	1	1	1	5	5	0	0.023				0	2	1	5	5	1	0.104				0	1	2	5	3	3	0.156				1	1	1	5	2	4	0.12
	1	2	0	5	2	4	0.021				0	3	0	5	0	5	0.09				0	2	1	5	0	5	0.146				1	2	0	5	1	4	0.09
8104.84	1	1	1	5	3	2	0.441	0.668		7315.5	0	3	0	5	2	3	0.29	0.344		7398.53	0	3	0	5	5	1	0.735	0.748		7723.98	1	2	0	5	1	4	0.318	0.426
	1	1	1	5	3	2	0.441				0	3	0	5	2	3	0.29				0	3	0	5	5	1	0.735				1	2	0	5	1	4	0.318
	1	1	1	5	5	0	0.193				0	1	2	5	0	5	0.133				0	2	1	5	4	1	0.038				0	0	3	5	4	2	0.083
	1	0	2	5	4	2	0.108				0	1	2	5	4	1	0.087				0	1	2	5	3	3	0.026				1	1	1	5	2	4	0.072
8148.64	0	0	3	5	5	0	0.455	0.69		7425.91	1	2	0	5	0	5	0.102	0.142		7430.89	0	3	0	5	5	1	0.128	0.157		7862.56	0	0	3	5	4	2	0.163	0.163
	0	0	3	5	5	0	0.455				1	2	0	5	0	5	0.102				0	3	0	5	5	1	0.128				0	0	3	5	4	2	0.163
	0	0	3	5	1	4	0.147				1	1	1	5	1	5	0.099				1	2	0	5	1	5	0.125				0	1	2	5	5	0	0.09
	0	0	3	5	3	2	0.088				0	1	2	5	2	3	0.098				0	0	3	5	0	5	0.101				1	1	1	5	2	4	0.087
8218.78	1	0	2	5	2	4	0.191	0.226		7459.5	0	1	2	5	2	3	0.125	0.2		7452	0	2	1	5	2	3	0.121	0.194		7893.98	0	1	2	5	5	0	0.32	0.367
	1	0	2	5	2	4	0.191				0	1	2	5	2	3	0.125				0	1	2	5	3	3	0.124				0	1	2	5	5	0	0.32
	1	1	1	5	1	4	0.141				0	3	0	5	2	3	0.083				0	2	1	5	2	3	0.121				1	2	0	5	1	4	0.108
	1	1	1	5	3	2	0.065				0	1	2	5	0	5	0.072				1	2	0	5	1	5	0.076				0	0	3	5	4	2	0.103
8404.4	1	1	1	5	5	0	0.641	0.818		7578.8	1	2	0	5	0	5	0.091	0.14		7509.74	0	2	1	5	4	1	0.25	0.366		7922.78	1	2	0	5	3	2	0.493	0.523
	1	1	1	5	5	0	0.641				1	2	0	5	0	5	0.091				0	2	1	5	4	1	0.25				1	2	0	5	3	2	0.493
	1	1	1	5	1	4	0.12				0	2	1	5	1	5	0.073				0	3	0	5	3	3	0.169				1	0	2	5	1	4	0.052
	1	1	1	5	3	2	0.058				0	3	0	5	0	5	0.073				0	1	2	5	5	1	0.122				1	0	1	5	2	4	0.037
8452.6	2	1	0	5	2	4	0.434	0.437		7668.62	0	1	2	5	2	3	0.339	0.435		7576.89	1	2	0	5	1	5	0.13	0.13		7979.83	0	1	2	5	5	0	0.153	0.332
	2	1	0	5	2	4	0.434				0	1	2	5	2	3	0.339				1	2	0	5	1	5	0.13				0	0	3	5	4	2	0.208
	1	0	2	5	4	2	0.17				0	0	3	5	3	3	0.107				0	2	1	5	0	5	0.096				0	1	2	5	5	0	0.153
	2	0	1	5	1	4	0.096				0	1	2	5	4	1	0.096				0	3	0	5	1	5	0.072				1	2	0	5	5	0	0.122
8486.95	1	0	2	5	4	2	0.39	0.39		7688.28	0	2	1	5	5	1	0.356	0.372		7658.98	0	0	3	5	2	3	0.338	0.397		8097.83	1	2	0	5	5	0	0.641	0.906
	1	0	2	5	4	2	0.39				0	2	1	5	5	1	0.356				0	0	3	5	2	3	0.338				1	2	0	5	5	0	0.641
	2	1	0	5	2	4	0.221				0	1	2	5	4	1	0.103				0	1	2	5	3	3	0.109				1	2	0	5	1	4	0.18
	1	1	1	5	3	2	0.06				0	1	2	5	2	3	0.066				1	1	1	5	0	5	0.047				1	2	0	5	3	2	0.085
8722.13	2	1	0	5	4	2	0.8	0.8		7700.6	0	2	1	5	5	1	0.369	0.374		7705.9	1	2	0	5	1	5	0.271	0.279		8182.71	1	0	2	5	3	2	0.398	0.417
	2	1	0	5	4	2	0.8				0	2	1	5	5	1	0.369				1	2	0	5	1	5	0.271				1	0	2	5	3	2	0.398
	2	0	1	5	3	2	0.095				1	2	0	5	0	5	0.074				0	0	3	5	2	3	0.135				1	1	1	5	4	2	0.115
	2	0	0	5	2	4	0.009				1	0	1	5	1	5	0.059				1	0	1	5	0	5	0.061				1	1	1	5	2	4	0.083
8772.21	2	0	1	5	1	4	0.217	0.397		7780.32	0	0	3	5	3	3	0.198	0.248		7834.44	1	2	0	5	3	3	0.57	0.583		8234.43	1	1	1	5	4	2	0.447	0.54
	2	0	1	5	1	4	0.217				0	0	3	5	3	3	0.198				1	2	0	5	3	3	0.57				1	1	1	5	4	2	0.447
	2	0	1	5	3	2	0.178				1	2	0	5	0	5	0.12				0	0	3	5	4	1	0.088				1	1	1	5	2	4	0.094
	2	1	0	5	2	4	0.144				0	1	2	5	4	1	0.099				1	1	1	5	4	1	0.065				1	0	2	5	1	4	0.086
8893.57	0	4	0	5	2	4	0.173	0.189		7859.14	1	2	0	5	0	5	0.228	0.578		7887.68	0	1	2	5	5	1	0.329	0.394		8331.05	1	0	2	5	5	0	0.303	0.548
	0	4	0	5	2	4	0.173				1	2	0	5	0	5	0.228				0	1	2	5	5	1	0.329				1	0	2	5	5	0	0.303
	0	3	0	5	2	4	0.068				1	2	0	5	2	3	0.185				0	0	3	5	4	1	0.132				1	0	2	5	3	2	0.21
	2	0	1	5	3	2	0.051				1	2	0	5	4	1	0.164				1	2	0	5	3	3	0.067				1	1	1	5	4	2	0.1
8910.99	2	0	1	5	3	2	0.344	0.646		7977.28	1	2	0	5	4	1	0.454	0.811		7968.78	0	1	2	5	5	1	0.345	0.371		8464.7	2	1	0	5	1	4	0.496	0.655
	2	0	1	5	3	2	0.344				1	2	0	5	4	1	0.454				0	1	2	5	5	1	0.345				2	1	0	5	1	4	0.496
	2	0	1	5	5	0	0.237				1	2	0	5	2	3	0.349				0	0	3	5	4	1	0.127				2	0	1	5	2	4	0.105
	2	0	1	5	1	4	0.066				1	1	1	5	5	1	0.049				1	2	0	5	3	3	0.043				2	1	0	5	3	2	0.098
8931.94	0	2	1	5	1	4	0.086	0.141		8046.93	1	1	1	5	3	3	0.217	0.241		8015.26	1	1	1	5	2	3	0.304	0.423		8657.9	1	0	2	5	5	0	0.413	0.617
	0	4	0	5	2	4	0.134				1	1	1	5	3	3	0.217				1	1	1	5	2	3	0.304				1	0	2	5	5	0	0.413
	0	2	1	5	1	4	0.086				1	0	2	5	0	5	0.153				1	0	2	5	3	3	0.119				1	0	2	5	1	4	0.131
	0	2	1	5	3	2	0.047				1	2	0	5	2	3	0.133				1	2	0	5	3	3	0.099				2	1	0	5	3	2	0.121
9115.67	0	4	0	5	4	2	0.404	0.535		8092.01	1	1	1	5	1	5	0.129	0.216		8083.75	1	1	1	5	0	5	0.153	0.187		8683.03	2	1	0	5	3	2	0.483	0.684
	0	4	0	5	4	2	0.404				1	1	1	5	1	5	0.129				1	1	1	5	0	5	0.153				2	1	0	5	3	2	0.483
	0	4	0	5	2	4	0.131				1	2	0	5	0	5	0.103				1	2	0	5	1	5	0.07				2	1	0	5	5	0	0.135
	0	1	2	5	2	4	0.035				1	1	1	5	3	3	0.087				1	0	2	5	1	5	0.056				1	0	2	5	5	0	0.133
										8147.56	0	0	3	5	5	1	0.704	0.704		8097.5	1	2	0	5	5	1	0.9	0.902		8778.64	2	0	1	5	2	4	0.387	0.391
											0	0	3	5	5	1	0.704				1	2	0	5	5	1	0.9				2	0	1	5	2	4	0.387
											0	0	2	5	4	1	0.05				0	1	2	5	5	1	0.036				2	1	0	5	1	4	0.089
											0	1	2	5	4	1	0.036				1	1	0	5	5	1	0.005				2	1	0	5	3	2	0.083
										8246.66	1	0	2	5	2	3	0.384	0.495		8229.95	1	1	1	5	2	3	0.366	0.713		8848.61	2	1	0	5	5	0	0.726	0.946
											1	0	2	5	2	3	0.384				1	1	1	5	2	3	0.366				2	1	0	5	5	0	0.726
											1	1	1	5	3	3	0.12				1	1	1	5	4	1	0.339				2	1	0	5	1	4	0.153
											1	0	2	5	0	5	0.107				1	2	0	5	3	3	0.058				2	1	0	5	3	2	0.067
										8279.89	2	1	0	5	0	5	0.254	0.485		8271.78	2	1	0	5	1	5	0.54	0.541		8884.85	0	4	0	5	3	2	0.076	0.111
											2	1	0	5	0	5	0.254				2	1	0	5	1	5	0.54				0	4	0	5	3	2	0.076
											2	1	0	5	4	1	0.128				2	0	1	5	0	5	0.041				0	3	0	5	1	4	0.047
											1	0	2	5	2	3	0.107				2	0	1	5	4	1	0.034				0	4	0	5	1	4	0.034
										8404.56	1	1	1	5	5	1	0.796	0.812		8336.5	1	0	2	5	3	3	0.36	0.39		8955.23	0	4	0	5	1	4	0.208	0.318
											1	1	1	5	5	1	0.796				1	0	2	5	3	3	0.36				0	4	0	5	1	4	0.208
											1	2	0	5	4	1	0.028				1	1	1	5	4	1	0.086				0	2	1	5	2	4	0.157
											1	0	2	5	4	1	0.026				1	1	1	5	0	5	0.058				0	4	0	5	5	0	0.081
										8473.98	1	0	2	5	4	1	0.369	0.557		8598.87	2	1	0	5	3	3	0.582	0.603		9022.68	2	0	1	5	4	2	0.736	0.738
											1	0	2	5	4	1	0.369				2	1	0	5	3	3	0.582				2	0	1	5	4	2	0.736
											1	0	2	5	2	3	0.161				2	0	1	5	0	5	0.131				2	1	0	5	3	2	0.032
											1	1	1	5	3	3	0.082				2	0	0	5	1	5	0.023				2	1	0	5	1	4	0.019
										8595.98	2	1	0	5	2	3	0.253	0.645		8631.8	2	1	0	5	3	3	0.14	0.268		9058.49	0	4	0	5	3	2	0.152	0.339
											2	1	0	5	2	3	0.253				2	1	0	5	3	3	0.14				0	4	0	5	3	2	0.152
											2	1	0	5	4	1	0.243				2	1	0	5	1	5	0.127				0	4	0	5	5	0	0.125
											2	1	0	5	0	5	0.149				2	0	1	5	0	5	0.069				0	4	0	5	1	4	0.063
										8630.92	2	1	0	5	0	5	0.244	0.248		8665	1	0	2	5	5	1	0.764	0.764
											2	1	0	5	0	5	0.244				1	0	2	5	5	1	0.764
											2	0	1	5	1	5	0.158				2	1	0	5	3	3	0.041
											2	0	0	5	0	5	0.031				1	1	1	5	4	1	0.037
										8670.45	0	3	0	5	0	5	0.051	0.068		8671.03	0	3	0	5	1	5	0.069	0.069
											0	3	0	5	0	5	0.051				0	3	0	5	1	5	0.069
											2	1	0	5	0	5	0.04				0	4	0	5	1	5	0.042
											0	4	0	5	0	5	0.03				2	1	0	5	1	5	0.035
										8737.03	0	2	1	5	1	5	0.147	0.15		8734.95	0	2	1	5	0	5	0.118	0.152
											0	2	1	5	1	5	0.147				0	4	0	5	1	5	0.139
											0	4	0	5	0	5	0.105				0	2	1	5	0	5	0.118
											0	1	2	5	0	5	0.03				0	1	2	5	1	5	0.06
										8744.13	2	1	0	5	2	3	0.472	0.916		8839.49	2	0	1	5	2	3	0.319	0.449
											2	1	0	5	2	3	0.472				2	1	0	5	5	1	0.376
											2	1	0	5	4	1	0.44				2	0	1	5	2	3	0.319
											2	0	1	5	5	1	0.029				2	0	1	5	0	5	0.121
										8895.85	2	0	1	5	3	3	0.582	0.587		8852.98	2	1	0	5	5	1	0.562	0.612
											2	0	1	5	3	3	0.582				2	1	0	5	5	1	0.562
											2	1	0	5	2	3	0.051				2	0	1	5	2	3	0.176
											2	1	0	5	0	5	0.028				2	0	1	5	0	5	0.08
										8909.28	0	4	0	5	2	3	0.129	0.205		8917.75	0	4	0	5	1	5	0.16	0.219
											0	4	0	5	2	3	0.129				0	4	0	5	1	5	0.16
											0	1	2	5	0	5	0.08				0	1	2	5	1	5	0.089
											0	4	0	5	4	1	0.056				0	4	0	5	3	3	0.059
																				9019.52	2	0	1	5	4	1	0.378	0.585
																					2	0	1	5	4	1	0.378
																					2	0	1	5	2	3	0.181
																					0	4	0	5	3	3	0.079
																				9032.22	0	4	0	5	3	3	0.231	0.237
																					0	4	0	5	3	3	0.231
																					2	0	1	5	4	1	0.118
																					2	0	1	5	2	3	0.067

## Sheet: J=6
A1 symmetry										A2 symmetry										B1 symmetry										B2 symmetry
Erovib	n1	n2	n3	J	Ka	Kc	RRD^2	FullVib		Erovib	n1	n2	n3	J	Ka	Kc	RRD^2	FullVib		Erovib	n1	n2	n3	J	Ka	Kc	RRD^2	FullVib		Erovib	n1	n2	n3	J	Ka	Kc	RRD^2	FullVib
801.56	0	0	0	6	0	6	0.687	0.688		993.23	0	0	0	6	2	5	0.498	0.777		991.04	0	0	0	6	1	5	0.778	0.78		801.61	0	0	0	6	1	6	0.48	0.688
	0	0	0	6	0	6	0.687				0	0	0	6	2	5	0.498				0	0	0	6	1	5	0.778				0	0	0	6	1	6	0.48
	0	0	1	6	1	6	0.153				0	0	0	6	4	3	0.265				0	0	1	6	2	5	0.136				0	0	1	6	0	6	0.246
	0	0	1	6	3	4	0.047				0	0	1	6	1	5	0.179				0	0	1	6	4	3	0.039				0	0	0	6	5	2	0.111
1123.62	0	0	0	6	2	4	0.866	0.87		1291.23	0	0	0	6	4	3	0.473	0.901		1206.15	0	0	0	6	3	3	0.917	0.919		1147.9	0	0	0	6	3	4	0.497	0.851
	0	0	0	6	2	4	0.866				0	0	0	6	4	3	0.473				0	0	0	6	3	3	0.917				0	0	0	6	3	4	0.497
	0	0	1	6	3	4	0.053				0	0	0	6	6	1	0.293				0	0	1	6	4	3	0.028				0	0	0	6	1	6	0.248
	0	0	1	6	1	6	0.032				0	0	0	6	2	5	0.136				0	0	1	6	6	1	0.02				0	0	0	6	5	2	0.106
1302.36	0	0	0	6	4	2	0.923	0.924		1650.87	0	0	0	6	6	1	0.657	0.976		1455.07	0	0	0	6	5	1	0.94	0.94		1454.41	0	0	0	6	5	2	0.641	0.938
	0	0	0	6	4	2	0.923				0	0	0	6	6	1	0.657				0	0	0	6	5	1	0.94				0	0	0	6	5	2	0.641
	0	0	1	6	5	2	0.053				0	0	0	6	2	5	0.171				0	0	1	6	4	3	0.026				0	0	0	6	3	4	0.273
	0	0	1	6	1	6	0.009				0	0	0	6	4	3	0.148				0	0	1	6	2	5	0.015				0	0	1	6	6	0	0.034
1650.88	0	0	0	6	6	0	0.976	0.976		3111.64	0	1	0	6	2	5	0.266	0.4		3110.86	0	1	0	6	1	5	0.402	0.402		2878.34	0	1	0	6	1	6	0.21	0.31
	0	0	0	6	6	0	0.976				0	1	0	6	2	5	0.266				0	1	0	6	1	5	0.402				0	1	0	6	1	6	0.21
	1	0	0	6	6	0	0.011				0	0	1	6	1	5	0.222				0	0	1	6	2	5	0.154				0	0	1	6	0	6	0.174
	0	0	1	6	5	2	0.005				0	1	0	6	4	3	0.125				0	0	2	6	1	5	0.122				0	0	2	6	1	6	0.1
2878.33	0	1	0	6	0	6	0.31	0.31		3361.24	0	1	0	6	2	5	0.258	0.328		3366.45	0	1	0	6	1	5	0.249	0.425		3203.61	0	1	0	6	1	6	0.191	0.383
	0	1	0	6	0	6	0.31				0	1	0	6	2	5	0.258				0	1	0	6	1	5	0.249				0	1	0	6	1	6	0.191
	0	0	2	6	0	6	0.164				0	0	1	6	1	5	0.194				0	0	1	6	4	3	0.203				0	1	1	6	0	6	0.13
	0	0	0	6	0	6	0.119				0	0	1	6	3	3	0.126				0	1	0	6	3	3	0.176				0	1	0	6	3	4	0.106
3203.7	0	1	0	6	0	6	0.367	0.386		3468.08	0	1	0	6	4	3	0.5	0.692		3413.46	0	1	0	6	3	3	0.563	0.694		3303.56	0	1	0	6	1	6	0.265	0.529
	0	1	0	6	0	6	0.367				0	1	0	6	4	3	0.5				0	1	0	6	3	3	0.563				0	1	0	6	1	6	0.265
	0	0	1	6	1	6	0.109				0	1	0	6	6	1	0.172				0	1	0	6	1	5	0.131				0	1	0	6	3	4	0.221
	0	0	0	6	0	6	0.108				0	0	1	6	3	3	0.096				0	0	1	6	2	5	0.077				0	0	1	6	2	4	0.192
3292.35	0	1	0	6	2	4	0.531	0.558		3531.89	0	0	1	6	3	3	0.579	0.645		3631.04	0	1	0	6	5	1	0.894	0.898		3454.92	0	0	1	6	2	4	0.422	0.578
	0	1	0	6	2	4	0.531				0	0	1	6	3	3	0.579				0	1	0	6	5	1	0.894				0	0	1	6	2	4	0.422
	0	0	1	6	3	4	0.111				0	1	0	6	2	5	0.09				0	0	1	6	6	1	0.022				0	0	1	6	4	2	0.156
	0	0	2	6	2	4	0.057				0	0	1	6	5	1	0.065				0	1	1	6	4	3	0.015				0	1	0	6	3	4	0.12
3490.32	0	1	0	6	4	2	0.773	0.777		3814.07	0	1	0	6	6	1	0.673	0.963		3664.48	0	0	1	6	4	3	0.28	0.575		3629.42	0	1	0	6	5	2	0.529	0.877
	0	1	0	6	4	2	0.773				0	1	0	6	6	1	0.673				0	0	1	6	4	3	0.28				0	1	0	6	5	2	0.529
	0	0	1	6	3	4	0.083				0	1	0	6	2	5	0.159				0	0	1	6	6	1	0.233				0	1	0	6	3	4	0.339
	0	1	1	6	5	2	0.043				0	1	0	6	4	3	0.132				0	1	0	6	3	3	0.163				0	0	1	6	6	0	0.044
3521.28	0	1	0	6	2	4	0.306	0.364		3849.48	0	0	1	6	5	1	0.72	0.72		3972.99	1	0	0	6	1	5	0.751	0.751		3663.32	0	0	1	6	4	2	0.616	0.631
	0	1	0	6	2	4	0.306				0	0	1	6	5	1	0.72				1	0	0	6	1	5	0.751				0	0	1	6	4	2	0.616
	0	0	1	6	3	4	0.215				0	1	0	6	4	3	0.05				1	0	1	6	2	5	0.136				0	0	2	6	5	2	0.081
	0	0	1	6	1	6	0.107				0	0	2	6	4	3	0.039				1	0	1	6	4	3	0.034				0	1	0	6	5	2	0.073
3784.3	1	0	0	6	0	6	0.659	0.659		3974.13	1	0	0	6	2	5	0.497	0.749		4074.8	0	0	1	6	6	1	0.601	0.876		3784.39	1	0	0	6	1	6	0.448	0.659
	1	0	0	6	0	6	0.659				1	0	0	6	2	5	0.497				0	0	1	6	6	1	0.601				1	0	0	6	1	6	0.448
	1	0	1	6	1	6	0.141				1	0	0	6	4	3	0.235				0	0	1	6	2	5	0.148				1	0	1	6	0	6	0.233
	1	0	1	6	5	2	0.047				1	0	1	6	1	5	0.172				0	0	1	6	4	3	0.127				1	0	0	6	5	2	0.111
3814.1	0	1	0	6	6	0	0.963	0.963		4257.98	1	0	0	6	4	3	0.492	0.883		4192.02	1	0	0	6	3	3	0.901	0.903		4074.73	0	0	1	6	6	0	0.875	0.875
	0	1	0	6	6	0	0.963				1	0	0	6	4	3	0.492				1	0	0	6	3	3	0.901				0	0	1	6	6	0	0.875
	1	1	0	6	6	0	0.01				1	0	0	6	6	1	0.273				1	0	1	6	4	3	0.033				0	1	0	6	5	2	0.029
	0	2	0	6	6	0	0.01				1	0	0	6	2	5	0.118				1	0	1	6	6	1	0.018				0	0	0	6	5	2	0.027
3849.73	0	0	1	6	5	2	0.477	0.715		4581.74	1	0	0	6	6	1	0.655	0.951		4405.57	1	0	0	6	5	1	0.923	0.924		4124.9	1	0	0	6	3	4	0.454	0.827
	0	0	1	6	5	2	0.477				1	0	0	6	6	1	0.655				1	0	0	6	5	1	0.923				1	0	0	6	3	4	0.454
	0	0	1	6	3	4	0.222				1	0	0	6	2	5	0.161				1	0	1	6	4	3	0.024				1	0	0	6	1	6	0.26
	0	1	0	6	4	2	0.09				1	0	0	6	4	3	0.135				1	0	1	6	2	5	0.013				1	0	0	6	5	2	0.113
4109.42	1	0	0	6	2	4	0.841	0.842		5195.96	0	1	1	6	1	5	0.258	0.263		5195.19	0	1	1	6	2	5	0.189	0.264		4404.46	1	0	0	6	5	2	0.61	0.92
	1	0	0	6	2	4	0.841				0	1	1	6	1	5	0.258				0	2	0	6	1	5	0.224				1	0	0	6	5	2	0.61
	1	0	1	6	3	4	0.048				0	2	0	6	2	5	0.147				0	1	1	6	2	5	0.189				1	0	0	6	3	4	0.292
	1	0	1	6	1	6	0.037				0	0	2	6	2	5	0.088				0	0	2	6	1	5	0.104				1	0	1	6	6	0	0.035
4273.63	1	0	0	6	4	2	0.91	0.914		5330.55	0	2	0	6	2	5	0.19	0.282		5333.97	0	2	0	6	1	5	0.283	0.288		4937.88	0	1	1	6	0	6	0.193	0.194
	1	0	0	6	4	2	0.91				0	0	1	6	1	5	0.197				0	2	0	6	1	5	0.283				0	1	1	6	0	6	0.193
	1	0	1	6	5	2	0.046				0	2	0	6	2	5	0.19				0	2	1	6	2	5	0.136				0	0	3	6	0	6	0.104
	1	0	1	6	1	6	0.007				0	2	1	6	1	5	0.166				0	0	1	6	2	5	0.125				0	2	0	6	1	6	0.091
4581.76	1	0	0	6	6	0	0.951	0.951		5546.27	0	2	0	6	4	3	0.324	0.658		5488.34	0	2	0	6	3	3	0.606	0.608		5108.2	0	2	0	6	1	6	0.167	0.25
	1	0	0	6	6	0	0.951				0	2	0	6	4	3	0.324				0	2	0	6	3	3	0.606				0	0	1	6	0	6	0.222
	2	0	0	6	6	0	0.02				0	2	0	6	6	1	0.221				0	1	1	6	4	3	0.122				0	2	1	6	0	6	0.203
	0	0	0	6	6	0	0.01				0	1	1	6	5	1	0.123				0	1	1	6	6	1	0.04				0	2	0	6	1	6	0.167
4937.87	0	1	1	6	1	6	0.125	0.194		5614.28	0	1	1	6	3	3	0.567	0.597		5664.95	0	0	2	6	3	3	0.292	0.379		5392.31	0	2	0	6	3	4	0.258	0.423
	0	2	0	6	0	6	0.135				0	1	1	6	3	3	0.567				0	0	2	6	3	3	0.292				0	2	0	6	3	4	0.258
	0	1	1	6	1	6	0.125				0	0	2	6	4	3	0.047				0	2	0	6	1	5	0.121				0	1	1	6	2	4	0.186
	0	1	2	6	0	6	0.119				0	0	1	6	3	3	0.041				0	0	2	6	1	5	0.086				0	2	0	6	1	6	0.103
5108.32	0	2	0	6	0	6	0.25	0.25		5702.02	0	2	0	6	4	3	0.129	0.207		5699.4	0	2	0	6	5	1	0.777	0.782		5487.39	0	1	1	6	2	4	0.202	0.25
	0	2	0	6	0	6	0.25				0	0	2	6	4	3	0.155				0	2	0	6	5	1	0.777				0	1	1	6	2	4	0.202
	0	0	1	6	1	6	0.166				0	1	1	6	1	5	0.142				0	1	1	6	6	1	0.071				0	2	0	6	3	4	0.116
	0	2	1	6	1	6	0.127				0	2	0	6	4	3	0.129				0	0	2	6	3	3	0.051				0	0	1	6	2	4	0.109
5380.61	0	2	0	6	2	4	0.417	0.419		5871	0	2	0	6	6	1	0.572	0.891		5737.93	0	1	1	6	4	3	0.22	0.264		5548.31	0	2	0	6	1	6	0.264	0.273
	0	2	0	6	2	4	0.417				0	2	0	6	6	1	0.572				0	1	1	6	4	3	0.22				0	2	0	6	1	6	0.264
	0	1	1	6	1	6	0.114				0	2	0	6	2	5	0.173				0	2	0	6	3	3	0.13				0	0	3	6	0	6	0.071
	0	1	1	6	3	4	0.1				0	2	0	6	4	3	0.147				0	0	2	6	3	3	0.069				0	1	1	6	0	6	0.071
5506.2	0	2	0	6	0	6	0.086	0.198		5927.6	0	1	1	6	5	1	0.201	0.329		5842.77	0	0	2	6	3	3	0.287	0.446		5695.81	0	2	0	6	5	2	0.552	0.767
	0	0	2	6	2	4	0.144				0	1	1	6	5	1	0.201				0	0	2	6	3	3	0.287				0	2	0	6	5	2	0.552
	0	1	1	6	3	4	0.114				0	0	2	6	4	3	0.137				0	0	2	6	5	1	0.159				0	2	0	6	3	4	0.188
	0	2	0	6	0	6	0.086				0	1	1	6	3	3	0.121				0	2	0	6	3	3	0.101				0	1	1	6	6	0	0.084
5557.05	0	2	0	6	0	6	0.146	0.361		5953.56	1	1	0	6	2	5	0.253	0.402		5954.59	1	1	0	6	1	5	0.482	0.487		5721.97	1	1	0	6	1	6	0.248	0.367
	0	2	0	6	0	6	0.146				1	1	0	6	2	5	0.253				1	1	0	6	1	5	0.482				1	1	0	6	1	6	0.248
	0	2	0	6	4	2	0.125				0	1	1	6	5	1	0.137				1	0	1	6	2	5	0.117				1	0	1	6	0	6	0.116
	0	2	0	6	2	4	0.09				1	1	0	6	4	3	0.132				1	0	2	6	1	5	0.091				1	1	1	6	0	6	0.076
5574.6	0	2	0	6	4	2	0.555	0.621		5994.93	0	1	1	6	5	1	0.275	0.315		6155.73	0	0	2	6	5	1	0.476	0.477		5748.97	0	1	1	6	4	2	0.475	0.572
	0	2	0	6	4	2	0.555				0	1	1	6	5	1	0.275				0	0	2	6	5	1	0.476				0	1	1	6	4	2	0.475
	0	0	2	6	2	4	0.087				0	0	2	6	6	1	0.233				0	1	1	6	6	1	0.167				0	1	1	6	2	4	0.096
	0	2	0	6	2	4	0.051				1	1	0	6	2	5	0.056				0	0	1	6	4	3	0.044				0	0	2	6	5	2	0.061
5721.23	1	1	0	6	0	6	0.388	0.388		6246.43	1	1	0	6	2	5	0.233	0.322		6193.31	0	1	1	6	6	1	0.443	0.739		5835.41	0	0	2	6	3	4	0.272	0.324
	1	1	0	6	0	6	0.388				1	1	0	6	2	5	0.233				0	1	1	6	6	1	0.443				0	0	2	6	3	4	0.272
	1	0	2	6	0	6	0.117				1	0	1	6	1	5	0.19				0	1	1	6	2	5	0.156				0	2	0	6	3	4	0.132
	1	0	1	6	1	6	0.072				1	0	1	6	3	3	0.091				0	1	1	6	4	3	0.14				0	1	1	6	2	4	0.12
5759.02	0	0	2	6	4	2	0.262	0.511		6301.59	1	1	0	6	4	3	0.543	0.668		6236.11	1	1	0	6	3	3	0.463	0.517		6084.94	1	1	0	6	3	4	0.146	0.293
	0	0	2	6	4	2	0.262				1	1	0	6	4	3	0.543				1	1	0	6	3	3	0.463				1	1	0	6	3	4	0.146
	0	0	2	6	2	4	0.249				1	1	0	6	6	1	0.123				1	0	1	6	4	3	0.158				1	0	2	6	1	6	0.118
	0	2	0	6	2	4	0.124				1	0	1	6	1	5	0.052				1	0	2	6	1	5	0.054				1	1	0	6	5	2	0.095
5871.26	0	2	0	6	6	0	0.894	0.896		6412.54	0	0	2	6	6	1	0.489	0.726		6283.86	1	1	0	6	3	3	0.24	0.462		6139.67	1	1	0	6	1	6	0.268	0.408
	0	2	0	6	6	0	0.894				0	0	2	6	6	1	0.489				1	1	0	6	3	3	0.24				1	1	0	6	1	6	0.268
	0	0	2	6	6	0	0.027				0	0	2	6	2	5	0.127				1	1	0	6	1	5	0.22				1	1	0	6	3	4	0.116
	0	1	0	6	6	0	0.012				0	0	2	6	4	3	0.11				1	0	1	6	2	5	0.118				1	0	1	6	2	4	0.073
5929.56	0	1	1	6	3	4	0.253	0.337		6429.63	1	0	1	6	3	3	0.652	0.682		6434.97	1	1	0	6	5	1	0.877	0.895		6162.01	0	0	2	6	5	2	0.247	0.354
	0	1	1	6	3	4	0.253				1	0	1	6	3	3	0.652				1	1	0	6	5	1	0.877				0	0	2	6	5	2	0.247
	0	0	2	6	4	2	0.227				1	1	0	6	2	5	0.045				1	0	1	6	6	1	0.026				0	1	1	6	6	0	0.139
	0	1	1	6	5	2	0.074				1	0	2	6	6	1	0.043				1	1	0	6	3	3	0.018				0	0	2	6	3	4	0.098
5990.32	0	1	1	6	5	2	0.309	0.386		6591.65	1	1	0	6	6	1	0.678	0.93		6542.13	1	0	1	6	4	3	0.297	0.582		6196.27	0	1	1	6	6	0	0.69	0.698
	0	1	1	6	5	2	0.309				1	1	0	6	6	1	0.678				1	0	1	6	4	3	0.297				0	1	1	6	6	0	0.69
	0	0	2	6	4	2	0.191				1	1	0	6	2	5	0.142				1	0	1	6	6	1	0.226				0	0	2	6	5	2	0.064
	0	0	2	6	6	0	0.097				1	1	0	6	4	3	0.11				1	1	0	6	3	3	0.126				0	2	0	6	5	2	0.039
6085.87	1	1	0	6	0	6	0.218	0.3		6707.7	1	0	1	6	5	1	0.714	0.715		6842.61	2	0	0	6	1	5	0.716	0.718		6356	1	0	1	6	2	4	0.474	0.577
	1	1	0	6	0	6	0.218				1	0	1	6	5	1	0.714				2	0	0	6	1	5	0.716				1	0	1	6	2	4	0.474
	1	0	1	6	1	6	0.132				1	0	2	6	4	3	0.042				2	0	1	6	2	5	0.136				1	0	1	6	4	2	0.101
	1	0	2	6	0	6	0.127				1	1	0	6	4	3	0.041				2	0	1	6	4	3	0.029				1	1	0	6	5	2	0.083
6141.87	1	1	0	6	2	4	0.5	0.572		6843.32	2	0	0	6	2	5	0.491	0.717		6910.81	1	0	1	6	6	1	0.594	0.854		6433.41	1	1	0	6	5	2	0.485	0.871
	1	1	0	6	2	4	0.5				2	0	0	6	2	5	0.491				1	0	1	6	6	1	0.594				1	1	0	6	5	2	0.485
	1	0	1	6	3	4	0.07				2	0	0	6	4	3	0.206				1	0	1	6	2	5	0.139				1	1	0	6	3	4	0.382
	1	1	1	6	1	6	0.069				2	0	1	6	1	5	0.166				1	0	1	6	4	3	0.121				1	0	1	6	6	0	0.038
6324.15	1	1	0	6	4	2	0.774	0.789		7117.48	2	0	0	6	4	3	0.508	0.865		7065.87	2	0	0	6	3	3	0.877	0.884		6542.28	1	0	1	6	4	2	0.656	0.664
	1	1	0	6	4	2	0.774				2	0	0	6	4	3	0.508				2	0	0	6	3	3	0.877				1	0	1	6	4	2	0.656
	1	0	1	6	3	4	0.061				2	0	0	6	6	1	0.253				2	0	1	6	4	3	0.038				1	0	2	6	5	2	0.09
	1	0	1	6	5	2	0.035				2	0	0	6	2	5	0.104				2	0	1	6	6	1	0.016				1	1	0	6	5	2	0.033
6408.05	1	0	1	6	3	4	0.246	0.373		7196.84	0	2	1	6	1	5	0.198	0.202		7195.33	0	2	1	6	2	5	0.136	0.203		6654.12	2	0	0	6	1	6	0.412	0.625
	1	0	1	6	3	4	0.246				0	2	1	6	1	5	0.198				0	3	0	6	1	5	0.14				2	0	0	6	1	6	0.412
	1	1	0	6	2	4	0.213				0	1	2	6	2	5	0.126				0	2	1	6	2	5	0.136				2	0	1	6	0	6	0.22
	1	0	1	6	1	6	0.109				0	3	0	6	2	5	0.093				0	1	2	6	1	5	0.133				2	0	0	6	5	2	0.111
6413.66	0	0	2	6	6	0	0.704	0.705		7299.44	0	3	0	6	2	5	0.122	0.192		7253.2	2	0	0	6	5	1	0.905	0.91		6910.62	1	0	1	6	6	0	0.854	0.854
	0	0	2	6	6	0	0.704				0	1	1	6	1	5	0.182				2	0	0	6	5	1	0.905				1	0	1	6	6	0	0.854
	0	0	1	6	5	2	0.04				0	3	0	6	2	5	0.122				2	0	1	6	4	3	0.021				2	0	1	6	6	0	0.024
	0	1	1	6	5	2	0.035				0	3	0	6	4	3	0.065				1	0	0	6	5	1	0.012				1	0	0	6	5	2	0.023
6591.69	1	1	0	6	6	0	0.927	0.93		7413.97	2	0	0	6	6	1	0.654	0.928		7305.29	0	3	0	6	1	5	0.204	0.214		6930.39	0	1	2	6	1	6	0.077	0.141
	1	1	0	6	6	0	0.927				2	0	0	6	6	1	0.654				0	3	0	6	1	5	0.204				0	2	1	6	0	6	0.119
	2	1	0	6	6	0	0.018				2	0	0	6	2	5	0.151				0	1	1	6	2	5	0.112				0	0	3	6	0	6	0.087
	1	2	0	6	6	0	0.01				2	0	0	6	4	3	0.123				0	1	1	6	4	3	0.069				0	1	2	6	1	6	0.077
6653.9	2	0	0	6	0	6	0.624	0.624		7467.81	0	3	0	6	2	5	0.168	0.25		7435.24	0	3	0	6	3	3	0.242	0.286		6991.58	2	0	0	6	3	4	0.415	0.8
	2	0	0	6	0	6	0.624				0	3	0	6	2	5	0.168				0	3	0	6	3	3	0.242				2	0	0	6	3	4	0.415
	2	0	1	6	1	6	0.131				0	3	0	6	6	1	0.075				0	2	1	6	4	3	0.12				2	0	0	6	1	6	0.266
	2	0	1	6	5	2	0.047				0	0	2	6	4	3	0.068				0	0	2	6	1	5	0.09				2	0	0	6	5	2	0.118
6708.09	1	0	1	6	5	2	0.46	0.707		7537.91	0	3	0	6	4	3	0.171	0.347		7570.38	0	3	0	6	3	3	0.207	0.391		7044.65	0	1	1	6	0	6	0.148	0.15
	1	0	1	6	5	2	0.46				0	2	1	6	3	3	0.182				0	3	0	6	3	3	0.207				0	1	1	6	0	6	0.148
	1	0	1	6	3	4	0.231				0	3	0	6	4	3	0.171				0	3	0	6	1	5	0.17				0	3	0	6	1	6	0.087
	1	1	0	6	4	2	0.071				0	2	1	6	5	1	0.15				0	0	2	6	1	5	0.097				0	0	2	6	1	6	0.049
6930.35	0	1	2	6	0	6	0.138	0.141		7626.06	0	2	1	6	3	3	0.248	0.258		7659.83	0	3	0	6	5	1	0.589	0.672		7251.53	2	0	0	6	5	2	0.581	0.905
	0	1	2	6	0	6	0.138				0	2	1	6	3	3	0.248				0	3	0	6	5	1	0.589				2	0	0	6	5	2	0.581
	0	2	0	6	0	6	0.092				0	3	0	6	4	3	0.189				0	2	1	6	6	1	0.15				2	0	0	6	3	4	0.309
	0	3	0	6	0	6	0.081				0	1	2	6	4	3	0.113				0	3	0	6	3	3	0.08				2	0	1	6	6	0	0.034
6981.68	2	0	0	6	2	4	0.805	0.811		7819.16	0	3	0	6	6	1	0.261	0.473		7742.15	0	1	2	6	3	3	0.311	0.372		7254.88	0	3	0	6	3	4	0.092	0.222
	2	0	0	6	2	4	0.805				0	3	0	6	6	1	0.261				0	1	2	6	3	3	0.311				0	0	2	6	1	6	0.107
	2	0	1	6	3	4	0.043				0	3	0	6	2	5	0.17				0	3	0	6	3	3	0.081				0	3	0	6	3	4	0.092
	2	0	1	6	1	6	0.041				0	0	3	6	3	3	0.07				0	3	0	6	5	1	0.07				0	3	0	6	1	6	0.076
7044.84	0	1	1	6	1	6	0.116	0.15		7848.25	0	3	0	6	6	1	0.21	0.397		7836.42	0	3	0	6	5	1	0.085	0.198		7413.9	0	3	0	6	1	6	0.197	0.386
	0	3	0	6	0	6	0.123				0	3	0	6	6	1	0.21				0	1	2	6	3	3	0.105				0	3	0	6	1	6	0.197
	0	1	1	6	1	6	0.116				0	0	3	6	3	3	0.173				0	3	0	6	5	1	0.085				0	3	0	6	3	4	0.174
	0	0	2	6	0	6	0.073				0	3	0	6	4	3	0.157				0	1	2	6	5	1	0.085				0	2	1	6	4	2	0.102
7137.69	2	0	0	6	4	2	0.888	0.905		7891.58	1	2	0	6	2	5	0.116	0.165		7883.64	1	2	0	6	1	5	0.128	0.16		7457.87	0	2	1	6	2	4	0.225	0.318
	2	0	0	6	4	2	0.888				0	0	3	6	3	3	0.147				1	2	0	6	1	5	0.128				0	2	1	6	2	4	0.225
	2	0	1	6	5	2	0.041				1	2	0	6	2	5	0.116				1	1	1	6	2	5	0.103				0	1	1	6	2	4	0.097
	2	0	0	6	2	4	0.017				0	1	2	6	4	3	0.095				0	3	0	6	3	3	0.09				0	2	1	6	4	2	0.092
7252.57	0	3	0	6	0	6	0.187	0.22		7953.24	0	2	1	6	5	1	0.093	0.188		7974.04	1	2	0	6	1	5	0.215	0.215		7608.08	1	2	0	6	1	6	0.098	0.161
	0	3	0	6	0	6	0.187				0	1	2	6	4	3	0.116				1	2	0	6	1	5	0.215				1	1	1	6	0	6	0.113
	0	0	2	6	0	6	0.114				1	2	0	6	2	5	0.11				0	0	3	6	4	3	0.105				1	2	0	6	1	6	0.098
	0	0	1	6	1	6	0.039				0	2	1	6	5	1	0.093				0	3	0	6	1	5	0.053				0	3	0	6	5	2	0.075
7402.19	0	3	0	6	2	4	0.232	0.277		7977.86	0	2	1	6	5	1	0.271	0.3		8090.62	1	2	0	6	1	5	0.13	0.162		7662.06	0	3	0	6	5	2	0.415	0.525
	0	3	0	6	2	4	0.232				0	2	1	6	5	1	0.271				1	2	0	6	1	5	0.13				0	3	0	6	5	2	0.415
	0	2	1	6	3	4	0.113				0	1	2	6	6	1	0.21				1	0	1	6	2	5	0.095				0	2	1	6	6	0	0.083
	0	2	1	6	1	6	0.087				0	3	0	6	6	1	0.12				1	1	1	6	4	3	0.06				0	3	0	6	1	6	0.059
7414.01	2	0	0	6	6	0	0.927	0.928		8063.62	0	0	3	6	3	3	0.137	0.253		8139.3	0	1	2	6	5	1	0.307	0.373		7679.94	0	2	1	6	4	2	0.156	0.251
	2	0	0	6	6	0	0.927				0	0	3	6	3	3	0.137				0	1	2	6	5	1	0.307				0	2	1	6	4	2	0.156
	1	0	0	6	6	0	0.017				0	0	3	6	5	1	0.114				0	2	1	6	4	3	0.083				0	0	3	6	2	4	0.127
	1	1	0	6	6	0	0.006				1	0	1	6	1	5	0.066				0	1	2	6	3	3	0.066				0	3	0	6	5	2	0.076
7494.6	0	3	0	6	4	2	0.233	0.424		8119.28	1	2	0	6	2	5	0.232	0.288		8180.29	0	2	1	6	6	1	0.322	0.522		7780.56	0	3	0	6	3	4	0.191	0.206
	0	3	0	6	4	2	0.233				1	2	0	6	2	5	0.232				0	2	1	6	6	1	0.322				0	3	0	6	3	4	0.191
	0	3	0	6	2	4	0.185				1	0	1	6	1	5	0.085				0	2	1	6	2	5	0.117				0	2	1	6	4	2	0.131
	0	2	1	6	3	4	0.111				0	0	3	6	3	3	0.065				0	2	1	6	4	3	0.083				0	1	2	6	3	4	0.047
7570.3	0	3	0	6	4	2	0.234	0.272		8245.36	1	2	0	6	4	3	0.464	0.656		8221.93	1	2	0	6	3	3	0.265	0.328		7819.32	0	3	0	6	1	6	0.146	0.236
	0	3	0	6	4	2	0.234				1	2	0	6	4	3	0.464				1	2	0	6	3	3	0.265				0	3	0	6	1	6	0.146
	0	1	2	6	2	4	0.206				1	2	0	6	6	1	0.146				0	2	1	6	6	1	0.13				0	2	1	6	4	2	0.094
	0	3	0	6	2	4	0.038				1	1	1	6	5	1	0.083				0	0	3	6	6	1	0.076				0	3	0	6	3	4	0.073
7620.11	1	2	0	6	0	6	0.177	0.177		8375.83	1	1	1	6	3	3	0.233	0.236		8275.63	1	2	0	6	3	3	0.258	0.267		7886.45	1	2	0	6	1	6	0.172	0.285
	1	2	0	6	0	6	0.177				1	1	1	6	3	3	0.233				1	2	0	6	3	3	0.258				1	2	0	6	1	6	0.172
	1	1	0	6	0	6	0.09				0	0	3	6	5	1	0.117				0	0	3	6	6	1	0.188				1	0	1	6	0	6	0.089
	1	1	1	6	1	6	0.088				0	1	2	6	6	1	0.108				0	1	2	6	5	1	0.159				1	2	0	6	5	2	0.062
7726.13	0	3	0	6	2	4	0.172	0.268		8397.35	1	1	1	6	3	3	0.28	0.292		8379.51	1	2	0	6	5	1	0.785	0.796		7958.11	0	0	3	6	4	2	0.3	0.505
	0	3	0	6	2	4	0.172				1	1	1	6	3	3	0.28				1	2	0	6	5	1	0.785				0	0	3	6	4	2	0.3
	0	0	2	6	2	4	0.117				0	1	2	6	6	1	0.141				1	1	1	6	6	1	0.087				0	0	3	6	2	4	0.204
	0	3	0	6	4	2	0.083				0	0	3	6	5	1	0.129				1	1	0	6	3	3	0.011				0	2	1	6	2	4	0.049
7805.8	0	3	0	6	0	6	0.125	0.17		8458.67	0	1	2	6	6	1	0.151	0.295		8444.5	1	0	2	6	3	3	0.234	0.309		8089.05	1	2	0	6	1	6	0.186	0.435
	0	3	0	6	0	6	0.125				1	2	0	6	6	1	0.212				1	0	2	6	3	3	0.234				1	2	0	6	1	6	0.186
	1	0	1	6	1	6	0.077				0	0	3	6	5	1	0.183				1	1	1	6	2	5	0.089				1	2	0	6	3	4	0.174
	0	2	1	6	1	6	0.065				0	1	2	6	6	1	0.151				1	0	2	6	1	5	0.059				0	0	3	6	4	2	0.09
7830.62	0	3	0	6	6	0	0.791	0.803		8488.19	1	1	1	6	1	5	0.156	0.193		8515.4	1	1	1	6	4	3	0.241	0.297		8136.65	0	1	2	6	3	4	0.232	0.342
	0	3	0	6	6	0	0.791				1	1	1	6	1	5	0.156				1	1	1	6	4	3	0.241				0	1	2	6	3	4	0.232
	0	1	2	6	6	0	0.033				1	0	2	6	4	3	0.073				1	2	0	6	3	3	0.115				0	1	2	6	5	2	0.104
	0	2	1	6	5	2	0.024				1	0	1	6	1	5	0.062				1	0	1	6	2	5	0.046				0	2	1	6	4	2	0.078
7887.11	1	2	0	6	0	6	0.29	0.291		8544.4	1	2	0	6	6	1	0.452	0.689		8615.7	1	0	2	6	3	3	0.387	0.497		8183.63	0	2	1	6	6	0	0.601	0.605
	1	2	0	6	0	6	0.29				1	2	0	6	6	1	0.452				1	0	2	6	3	3	0.387				0	2	1	6	6	0	0.601
	1	0	1	6	1	6	0.06				1	2	0	6	2	5	0.13				1	0	2	6	5	1	0.108				0	3	0	6	5	2	0.068
	0	1	2	6	2	4	0.033				0	1	2	6	6	1	0.114				1	1	1	6	2	5	0.051				0	2	0	6	5	2	0.037
7932.5	0	1	2	6	4	2	0.336	0.42		8671.04	1	1	1	6	5	1	0.587	0.612		8678.72	0	0	3	6	6	1	0.42	0.616		8247.03	1	1	1	6	2	4	0.114	0.149
	0	1	2	6	4	2	0.336				1	1	1	6	5	1	0.587				0	0	3	6	6	1	0.42				0	1	2	6	5	2	0.115
	0	1	2	6	2	4	0.077				1	2	0	6	4	3	0.043				0	0	3	6	2	5	0.105				1	1	1	6	2	4	0.114
	0	0	3	6	5	2	0.049				1	2	0	6	6	1	0.034				0	0	3	6	4	3	0.09				0	0	3	6	6	0	0.071
7974.03	0	2	1	6	5	2	0.229	0.314		8681.99	2	1	0	6	2	5	0.339	0.471		8693.64	2	1	0	6	1	5	0.473	0.49		8277.9	0	0	3	6	4	2	0.109	0.164
	0	2	1	6	5	2	0.229				2	1	0	6	2	5	0.339				2	1	0	6	1	5	0.473				0	0	3	6	4	2	0.109
	0	1	2	6	6	0	0.156				2	1	0	6	4	3	0.114				2	0	1	6	2	5	0.065				1	2	0	6	3	4	0.081
	0	3	0	6	4	2	0.15				2	0	1	6	1	5	0.097				0	0	3	6	6	1	0.035				1	1	1	6	2	4	0.074
8054.78	0	0	3	6	3	4	0.155	0.183		8759.31	1	0	2	6	6	1	0.21	0.365		8874.28	1	1	1	6	6	1	0.591	0.785		8322.06	1	1	1	6	2	4	0.068	0.151
	0	0	3	6	3	4	0.155				1	0	2	6	6	1	0.21				1	1	1	6	6	1	0.591				1	2	0	6	1	6	0.135
	0	1	2	6	2	4	0.08				1	0	2	6	4	3	0.135				1	1	1	6	2	5	0.115				1	1	1	6	2	4	0.068
	0	2	1	6	3	4	0.071				1	1	1	6	3	3	0.105				1	1	1	6	4	3	0.079				1	1	1	6	0	6	0.066
8126.58	1	2	0	6	2	4	0.402	0.452		8990.73	2	1	0	6	4	3	0.201	0.522		8928.12	1	0	2	6	5	1	0.442	0.443		8377.27	1	2	0	6	5	2	0.492	0.811
	1	2	0	6	2	4	0.402				2	1	0	6	4	3	0.201				1	0	2	6	5	1	0.442				1	2	0	6	5	2	0.492
	0	0	3	6	3	4	0.09				2	1	0	6	2	5	0.176				2	0	1	6	4	3	0.079				1	2	0	6	3	4	0.314
	1	2	0	6	4	2	0.05				2	1	0	6	6	1	0.144				1	1	1	6	4	3	0.06				1	1	1	6	6	0	0.053
8256.03	1	2	0	6	4	2	0.258	0.283		9040.89	2	1	0	6	4	3	0.344	0.391		8982.43	2	1	0	6	3	3	0.517	0.551		8462.81	2	1	0	6	1	6	0.31	0.472
	1	2	0	6	4	2	0.258				2	1	0	6	4	3	0.344				2	1	0	6	3	3	0.517				2	1	0	6	1	6	0.31
	1	1	1	6	3	4	0.177				2	0	1	6	1	5	0.141				2	0	1	6	4	3	0.087				2	1	0	6	5	2	0.083
	1	0	2	6	2	4	0.063				2	1	0	6	6	1	0.037				1	0	2	6	5	1	0.085				2	1	0	6	3	4	0.079
8299.96	1	2	0	6	4	2	0.28	0.364		9109.43	0	3	0	6	2	5	0.056	0.102		9038.41	2	1	0	6	1	5	0.169	0.287		8507.4	1	1	1	6	4	2	0.565	0.608
	1	2	0	6	4	2	0.28				0	3	0	6	2	5	0.056				2	1	0	6	1	5	0.169				1	1	1	6	4	2	0.565
	1	1	1	6	5	2	0.061				0	3	0	6	4	3	0.045				2	0	1	6	2	5	0.124				1	0	2	6	5	2	0.069
	1	2	0	6	0	6	0.052				0	4	0	6	4	3	0.035				2	1	0	6	3	3	0.114				1	1	1	6	2	4	0.041
8341.36	1	2	0	6	2	4	0.168	0.283		9149.32	0	2	1	6	1	5	0.156	0.164		9104.35	0	3	0	6	1	5	0.088	0.091		8615.53	1	0	2	6	3	4	0.214	0.265
	1	2	0	6	2	4	0.168				0	2	1	6	1	5	0.156				0	3	0	6	1	5	0.088				1	0	2	6	3	4	0.214
	1	2	0	6	4	2	0.086				0	4	0	6	4	3	0.069				0	2	1	6	2	5	0.027				1	1	1	6	2	4	0.174
	1	1	1	6	1	6	0.077				0	4	0	6	2	5	0.044				0	4	0	6	1	5	0.027				1	0	1	6	2	4	0.062
8388.87	0	0	3	6	5	2	0.172	0.25		9157.94	1	0	2	6	6	1	0.499	0.716		9142.86	2	1	0	6	5	1	0.84	0.883		8679.69	0	0	3	6	6	0	0.659	0.659
	0	1	2	6	6	0	0.18				1	0	2	6	6	1	0.499				2	1	0	6	5	1	0.84				0	0	3	6	6	0	0.659
	0	0	3	6	5	2	0.172				1	0	2	6	2	5	0.119				2	1	0	6	3	3	0.042				0	0	2	6	5	2	0.06
	0	0	3	6	3	4	0.072				1	0	2	6	4	3	0.098				2	0	1	6	6	1	0.028				0	2	1	6	6	0	0.048
8457.43	0	1	2	6	6	0	0.292	0.302		9205.18	2	0	1	6	3	3	0.657	0.68		9164.77	0	4	0	6	1	5	0.163	0.176		8817.4	2	1	0	6	3	4	0.046	0.083
	0	1	2	6	6	0	0.292				2	0	1	6	3	3	0.657				0	4	0	6	1	5	0.163				0	2	1	6	0	6	0.06
	1	2	0	6	6	0	0.157				2	1	0	6	2	5	0.03				0	2	1	6	4	3	0.074				2	1	0	6	3	4	0.046
	0	0	3	6	5	2	0.108				1	0	2	6	6	1	0.026				0	2	1	6	2	5	0.073				2	0	1	6	0	6	0.044
8462.44	2	1	0	6	0	6	0.443	0.443		9276.44	2	1	0	6	6	1	0.678	0.895		9294.64	2	0	1	6	4	3	0.088	0.179		8840.45	2	1	0	6	3	4	0.156	0.253
	2	1	0	6	0	6	0.443				2	1	0	6	6	1	0.678				0	4	0	6	3	3	0.125				2	1	0	6	3	4	0.156
	2	0	1	6	1	6	0.034				2	1	0	6	2	5	0.125				2	0	1	6	4	3	0.088				2	1	0	6	5	2	0.089
	2	0	0	6	0	6	0.026				2	1	0	6	4	3	0.092				2	0	1	6	6	1	0.071				2	0	0	6	1	6	0.035
8544.44	1	2	0	6	6	0	0.678	0.679		9333.13	0	4	0	6	2	5	0.195	0.319		9300.87	2	0	1	6	4	3	0.217	0.394		8873.27	1	1	1	6	6	0	0.617	0.623
	1	2	0	6	6	0	0.678				0	4	0	6	2	5	0.195				2	0	1	6	4	3	0.217				1	1	1	6	6	0	0.617
	0	1	2	6	6	0	0.165				0	4	0	6	6	1	0.117				2	0	1	6	6	1	0.144				2	1	0	6	1	6	0.073
	0	1	1	6	5	2	0.017				0	1	2	6	4	3	0.046				2	1	0	6	3	3	0.072				1	2	0	6	5	2	0.017
8550.51	1	0	2	6	2	4	0.255	0.469		9410.51	0	4	0	6	6	1	0.078	0.141												8880.89	2	1	0	6	1	6	0.24	0.33
	1	0	2	6	2	4	0.255				0	4	0	6	6	1	0.078														2	1	0	6	1	6	0.24
	1	0	2	6	4	2	0.213				0	4	0	6	4	3	0.05														1	1	1	6	6	0	0.14
	1	2	0	6	2	4	0.058				0	1	2	6	2	5	0.042														2	1	0	6	3	4	0.069
8673.29	1	1	1	6	3	4	0.299	0.583		9451.34	2	0	1	6	5	1	0.694	0.696												8905.75	0	1	2	6	1	6	0.062	0.094
	1	1	1	6	3	4	0.299				2	0	1	6	5	1	0.694														0	2	1	6	0	6	0.066
	1	1	1	6	5	2	0.284				2	1	0	6	4	3	0.031														0	1	1	6	0	6	0.063
	1	2	0	6	4	2	0.102				2	0	0	6	4	3	0.022														0	1	2	6	1	6	0.062
8746.5	1	0	2	6	4	2	0.383	0.418																						8939.42	1	0	2	6	5	2	0.32	0.491
	1	0	2	6	4	2	0.383																								1	0	2	6	5	2	0.32
	1	1	1	6	5	2	0.089																								1	0	2	6	3	4	0.162
	1	0	2	6	6	0	0.035																								1	1	1	6	4	2	0.079
8818.13	0	2	1	6	1	6	0.047	0.066																						9084.73	0	4	0	6	3	4	0.049	0.117
	0	2	1	6	1	6	0.047																								0	1	2	6	1	6	0.055
	0	3	0	6	0	6	0.045																								0	4	0	6	3	4	0.049
	2	1	0	6	0	6	0.042																								0	4	0	6	1	6	0.045
8845.44	2	1	0	6	2	4	0.164	0.248																						9119.19	2	1	0	6	5	2	0.357	0.443
	2	1	0	6	2	4	0.164																								2	1	0	6	5	2	0.357
	2	0	1	6	1	6	0.072																								2	0	1	6	2	4	0.274
	2	1	0	6	0	6	0.064																								2	1	0	6	3	4	0.059
8881.36	2	1	0	6	2	4	0.38	0.487																						9150.93	2	1	0	6	3	4	0.347	0.53
	2	1	0	6	2	4	0.38																								2	1	0	6	3	4	0.347
	2	1	0	6	0	6	0.066																								2	0	1	6	2	4	0.22
	2	0	1	6	3	4	0.043																								2	1	0	6	5	2	0.18
8906.51	0	1	2	6	0	6	0.093	0.094																						9258.97	0	4	0	6	3	4	0.223	0.244
	0	1	2	6	0	6	0.093																								0	4	0	6	3	4	0.223
	0	4	0	6	0	6	0.071																								0	2	1	6	2	4	0.069
	0	2	1	6	1	6	0.065																								0	0	3	6	0	6	0.043
9054.24	2	1	0	6	4	2	0.723	0.768																						9301.65	2	0	1	6	4	2	0.647	0.656
	2	1	0	6	4	2	0.723																								2	0	1	6	4	2	0.647
	2	0	1	6	3	4	0.06																								2	0	0	6	5	2	0.021
	2	1	0	6	2	4	0.042																								2	1	0	6	5	2	0.019
9081.97	0	4	0	6	0	6	0.098	0.112
	0	4	0	6	0	6	0.098
	0	1	2	6	0	6	0.051
	0	0	2	6	0	6	0.04
9157.63	1	0	2	6	6	0	0.67	0.672
	1	0	2	6	6	0	0.67
	1	0	1	6	5	2	0.042
	2	0	1	6	3	4	0.037
9172.05	2	0	1	6	3	4	0.21	0.36
	2	0	1	6	3	4	0.21
	2	1	0	6	2	4	0.151
	2	0	1	6	1	6	0.117
9276.15	2	1	0	6	6	0	0.841	0.848
	2	1	0	6	6	0	0.841
	1	0	2	6	6	0	0.012
	1	2	0	6	6	0	0.01
9281.01	0	4	0	6	2	4	0.098	0.154
	0	4	0	6	2	4	0.098
	0	3	0	6	2	4	0.057
	0	4	0	6	4	2	0.054
9314.26	0	4	0	6	0	6	0.104	0.275
	0	4	0	6	0	6	0.104
	0	4	0	6	4	2	0.103
	0	4	0	6	2	4	0.062

## Sheet: J=7
A1 symmetry										A2 symmetry										B1 symmetry										B2 symmetry
Erovib	n1	n2	n3	J	Ka	Kc	RRD^2	FullVib		Erovib	n1	n2	n3	J	Ka	Kc	RRD^2	FullVib		Erovib	n1	n2	n3	J	Ka	Kc	RRD^2	FullVib		Erovib	n1	n2	n3	J	Ka	Kc	RRD^2	FullVib
1273.97	0	0	0	7	2	6	0.691	0.694		1048.85	0	0	0	7	0	7	0.418	0.6		1048.86	0	0	0	7	1	7	0.599	0.6		1273.3	0	0	0	7	1	6	0.432	0.695
	0	0	0	7	2	6	0.691				0	0	0	7	0	7	0.418				0	0	0	7	1	7	0.599				0	0	0	7	1	6	0.432
	0	0	1	7	1	6	0.173				0	0	1	7	1	7	0.293				0	0	1	7	0	7	0.183				0	0	0	7	3	4	0.24
	0	0	1	7	3	4	0.047				0	0	0	7	6	1	0.081				0	0	2	7	1	7	0.059				0	0	1	7	2	6	0.237
1612.71	0	0	0	7	4	4	0.842	0.844		1444.87	0	0	0	7	2	5	0.444	0.793		1455.94	0	0	0	7	3	5	0.776	0.78		1553.78	0	0	0	7	5	2	0.423	0.874
	0	0	0	7	4	4	0.842				0	0	0	7	2	5	0.444				0	0	0	7	3	5	0.776				0	0	0	7	5	2	0.423
	0	0	1	7	3	4	0.07				0	0	0	7	0	7	0.209				0	0	1	7	4	3	0.064				0	0	0	7	3	4	0.372
	0	0	1	7	7	0	0.032				0	0	1	7	3	5	0.165				0	0	1	7	0	7	0.057				0	0	1	7	4	4	0.099
1969.07	0	0	0	7	6	2	0.923	0.923		1643.02	0	0	0	7	4	3	0.462	0.896		1776.07	0	0	0	7	5	3	0.885	0.886		1779.45	0	0	0	7	5	2	0.388	0.896
	0	0	0	7	6	2	0.923				0	0	0	7	4	3	0.462				0	0	0	7	5	3	0.885				0	0	0	7	5	2	0.388
	0	0	1	7	5	2	0.021				0	0	0	7	2	5	0.342				0	0	1	7	6	1	0.07				0	0	0	7	7	0	0.293
	0	0	1	7	1	6	0.014				0	0	1	7	5	3	0.075				0	0	1	7	2	5	0.019				0	0	0	7	3	4	0.121
3364.07	0	1	0	7	2	6	0.309	0.309		1969.21	0	0	0	7	6	1	0.629	0.923		2194.69	0	0	0	7	7	1	0.963	0.963		2194.7	0	0	0	7	7	0	0.639	0.963
	0	1	0	7	2	6	0.309				0	0	0	7	6	1	0.629				0	0	0	7	7	1	0.963				0	0	0	7	7	0	0.639
	0	0	2	7	2	6	0.162				0	0	0	7	4	3	0.259				1	0	0	7	7	1	0.02				0	0	0	7	1	6	0.143
	0	0	0	7	2	6	0.122				0	0	1	7	7	1	0.042				0	1	0	7	7	1	0.009				0	0	0	7	3	4	0.092
3656.04	0	1	0	7	2	6	0.33	0.351		3092.98	0	1	0	7	0	7	0.161	0.239		3092.98	0	1	0	7	1	7	0.239	0.239		3363.84	0	1	0	7	1	6	0.201	0.309
	0	1	0	7	2	6	0.33				0	1	0	7	0	7	0.161				0	1	0	7	1	7	0.239				0	1	0	7	1	6	0.201
	0	0	1	7	3	4	0.164				0	0	2	7	0	7	0.113				0	0	2	7	1	7	0.184				0	0	1	7	2	6	0.173
	0	1	1	7	1	6	0.095				0	0	1	7	1	7	0.113				0	0	0	7	1	7	0.155				0	0	2	7	1	6	0.122
3779.21	0	1	0	7	4	4	0.521	0.57		3462.34	0	1	0	7	0	7	0.19	0.367		3462.34	0	1	0	7	1	7	0.359	0.367		3657.89	0	1	0	7	1	6	0.28	0.377
	0	1	0	7	4	4	0.521				0	1	0	7	0	7	0.19				0	1	0	7	1	7	0.359				0	1	0	7	1	6	0.28
	0	0	1	7	3	4	0.067				0	1	1	7	1	7	0.171				0	0	0	7	1	7	0.112				0	1	1	7	2	6	0.1
	0	1	1	7	3	4	0.066				0	0	0	7	0	7	0.099				0	1	1	7	0	7	0.085				0	0	1	7	4	4	0.092
3866.52	0	0	1	7	5	2	0.471	0.606		3585.54	0	1	0	7	0	7	0.21	0.427		3589.87	0	1	0	7	3	5	0.399	0.417		3747.01	0	1	0	7	3	4	0.43	0.61
	0	0	1	7	5	2	0.471				0	1	0	7	0	7	0.21				0	1	0	7	3	5	0.399				0	1	0	7	3	4	0.43
	0	1	0	7	4	4	0.171				0	0	1	7	3	5	0.187				0	0	2	7	3	5	0.112				0	1	0	7	5	2	0.171
	0	0	1	7	3	4	0.121				0	1	0	7	2	5	0.156				0	0	0	7	3	5	0.078				0	0	1	7	4	4	0.102
4128.75	0	1	0	7	6	2	0.873	0.873		3809.34	0	1	0	7	4	3	0.313	0.489		3784.25	0	0	1	7	2	5	0.404	0.458		3951.4	0	1	0	7	5	2	0.297	0.766
	0	1	0	7	6	2	0.873				0	1	0	7	4	3	0.313				0	0	1	7	2	5	0.404				0	1	0	7	5	2	0.297
	0	0	1	7	7	0	0.046				0	0	1	7	5	3	0.139				0	1	0	7	3	5	0.248				0	1	0	7	7	0	0.251
	0	1	1	7	5	2	0.014				0	0	1	7	3	5	0.108				0	0	2	7	3	5	0.083				0	1	0	7	3	4	0.122
4164.56	0	0	1	7	5	2	0.237	0.572		3858.63	0	1	0	7	2	5	0.535	0.611		3948.24	0	1	0	7	5	3	0.776	0.789		3987.95	0	0	1	7	4	4	0.38	0.386
	0	0	1	7	5	2	0.237				0	1	0	7	2	5	0.535				0	1	0	7	5	3	0.776				0	0	1	7	4	4	0.38
	0	0	1	7	7	0	0.208				0	0	1	7	3	5	0.114				0	0	1	7	6	1	0.073				0	1	0	7	5	2	0.228
	0	1	0	7	4	4	0.126				0	1	0	7	4	3	0.061				0	1	1	7	6	1	0.034				0	0	2	7	3	4	0.054
4252.45	1	0	0	7	2	6	0.656	0.656		4028.74	1	0	0	7	0	7	0.384	0.566		3982.52	0	0	1	7	4	3	0.379	0.575		4251.94	1	0	0	7	1	6	0.424	0.657
	1	0	0	7	2	6	0.656				1	0	0	7	0	7	0.384				0	0	1	7	4	3	0.379				1	0	0	7	1	6	0.424
	1	0	1	7	1	6	0.17				1	0	1	7	1	7	0.277				0	0	1	7	2	5	0.168				1	0	1	7	2	6	0.228
	1	0	1	7	3	4	0.041				1	0	0	7	6	1	0.078				0	1	0	7	3	5	0.109				1	0	0	7	3	4	0.204
4580.54	1	0	0	7	4	4	0.81	0.812		4128.84	0	1	0	7	6	1	0.599	0.871		4029.02	1	0	0	7	1	7	0.564	0.564		4339.23	0	1	0	7	7	0	0.613	0.934
	1	0	0	7	4	4	0.81				0	1	0	7	6	1	0.599				1	0	0	7	1	7	0.564				0	1	0	7	7	0	0.613
	1	0	1	7	3	4	0.075				0	1	0	7	4	3	0.235				1	0	1	7	0	7	0.168				0	1	0	7	1	6	0.139
	1	0	1	7	7	0	0.028				0	0	1	7	7	1	0.055				1	0	2	7	1	7	0.051				0	1	0	7	3	4	0.092
4642.95	0	0	1	7	7	0	0.583	0.853		4165.79	0	0	1	7	5	3	0.548	0.551		4339.17	0	1	0	7	7	1	0.933	0.933		4386.66	0	0	1	7	6	2	0.683	0.684
	0	0	1	7	7	0	0.583				0	0	1	7	5	3	0.548				0	1	0	7	7	1	0.933				0	0	1	7	6	2	0.683
	0	0	1	7	1	6	0.12				0	1	0	7	4	3	0.117				1	1	0	7	7	1	0.019				0	1	0	7	7	0	0.049
	0	0	1	7	3	4	0.075				0	0	2	7	6	1	0.092				0	2	0	7	7	1	0.016				0	0	2	7	5	2	0.027
4900.43	1	0	0	7	6	2	0.893	0.893		4425.83	1	0	0	7	2	5	0.356	0.752		4386.32	0	0	1	7	6	1	0.452	0.681		4540.16	1	0	0	7	3	4	0.414	0.841
	1	0	0	7	6	2	0.893				1	0	0	7	2	5	0.356				0	0	1	7	6	1	0.452				1	0	0	7	3	4	0.414
	2	0	0	7	6	2	0.022				1	0	0	7	0	7	0.225				0	0	1	7	4	3	0.205				1	0	0	7	5	2	0.347
	1	0	1	7	5	2	0.021				1	0	1	7	3	5	0.165				0	1	0	7	5	3	0.083				1	0	1	7	4	4	0.102
5433.13	0	1	1	7	1	6	0.132	0.191		4620.35	1	0	0	7	2	5	0.401	0.866		4431.91	1	0	0	7	3	5	0.74	0.74		4733.8	1	0	0	7	5	2	0.441	0.875
	0	1	1	7	1	6	0.132				1	0	0	7	2	5	0.401				1	0	0	7	3	5	0.74				1	0	0	7	5	2	0.441
	0	2	0	7	2	6	0.132				1	0	0	7	4	3	0.393				1	0	1	7	4	3	0.062				1	0	0	7	7	0	0.266
	0	1	2	7	2	6	0.124				1	0	1	7	5	3	0.074				1	0	1	7	0	7	0.06				1	0	0	7	3	4	0.09
5587.56	0	2	0	7	2	6	0.244	0.244		4643.09	0	0	1	7	7	1	0.844	0.844		4728.2	1	0	0	7	5	3	0.859	0.86		5104.84	1	0	0	7	7	0	0.625	0.92
	0	2	0	7	2	6	0.244				0	0	1	7	7	1	0.844				1	0	0	7	5	3	0.859				1	0	0	7	7	0	0.625
	0	2	1	7	1	6	0.129				0	0	0	7	6	1	0.029				1	0	1	7	6	1	0.067				1	0	0	7	1	6	0.131
	0	0	1	7	1	6	0.123				0	1	0	7	6	1	0.027				1	0	1	7	2	5	0.021				1	0	0	7	3	4	0.083
5848.17	0	2	0	7	4	4	0.471	0.482		4900.69	1	0	0	7	6	1	0.589	0.894		5104.84	1	0	0	7	7	1	0.919	0.92		5432.9	0	1	1	7	2	6	0.191	0.191
	0	2	0	7	4	4	0.471				1	0	0	7	6	1	0.589				1	0	0	7	7	1	0.919				0	1	1	7	2	6	0.191
	0	1	1	7	3	4	0.124				1	0	0	7	4	3	0.278				2	0	0	7	7	1	0.036				0	0	3	7	2	6	0.102
	0	1	1	7	7	0	0.048				1	0	1	7	7	1	0.043				0	0	0	7	7	1	0.017				0	1	2	7	1	6	0.088
5924.89	0	1	1	7	5	2	0.255	0.406		5131.08	0	1	0	7	0	7	0.09	0.122		5131.09	0	1	0	7	1	7	0.122	0.122		5588.99	0	2	0	7	1	6	0.162	0.246
	0	1	1	7	5	2	0.255				0	0	3	7	1	7	0.121				0	1	0	7	1	7	0.122				0	0	1	7	2	6	0.215
	0	1	1	7	3	4	0.146				0	1	1	7	1	7	0.118				0	1	2	7	1	7	0.115				0	2	1	7	2	6	0.185
	0	0	2	7	4	4	0.11				0	1	0	7	0	7	0.09				0	2	0	7	1	7	0.093				0	2	0	7	1	6	0.162
6010.29	0	2	0	7	2	6	0.197	0.261		5329.41	0	0	1	7	1	7	0.2	0.204		5329.38	0	0	1	7	0	7	0.158	0.204		5815.25	0	2	0	7	5	2	0.2	0.44
	0	2	0	7	2	6	0.197				0	0	1	7	1	7	0.2				0	2	0	7	1	7	0.185				0	2	0	7	5	2	0.2
	0	1	2	7	2	6	0.067				0	2	1	7	1	7	0.171				0	0	1	7	0	7	0.158				0	1	1	7	4	4	0.199
	0	2	0	7	4	4	0.064				0	2	0	7	0	7	0.124				0	2	1	7	0	7	0.113				0	2	0	7	3	4	0.181
6174.9	0	2	0	7	6	2	0.651	0.66		5664.53	0	2	0	7	2	5	0.139	0.259		5668.83	0	2	0	7	3	5	0.257	0.264		5959.61	0	0	2	7	3	4	0.166	0.237
	0	2	0	7	6	2	0.651				0	1	1	7	3	5	0.238				0	2	0	7	3	5	0.257				0	0	2	7	3	4	0.166
	0	1	1	7	7	0	0.1				0	2	0	7	2	5	0.139				0	1	1	7	0	7	0.102				0	2	0	7	1	6	0.13
	1	1	0	7	2	6	0.048				0	1	2	7	0	7	0.074				0	1	2	7	3	5	0.088				0	0	1	7	4	4	0.084
6205.14	1	1	0	7	2	6	0.281	0.282		5771.23	0	2	0	7	4	3	0.078	0.196		5763.97	0	2	0	7	1	7	0.093	0.179		6012.62	0	2	0	7	5	2	0.224	0.612
	1	1	0	7	2	6	0.281				0	0	1	7	3	5	0.128				0	2	0	7	1	7	0.093				0	2	0	7	5	2	0.224
	1	0	2	7	2	6	0.106				0	2	1	7	3	5	0.079				0	1	1	7	2	5	0.09				0	2	0	7	7	0	0.204
	0	2	0	7	6	2	0.089				0	2	0	7	4	3	0.078				0	2	0	7	3	5	0.085				0	2	0	7	3	4	0.151
6243.77	0	1	1	7	5	2	0.331	0.377		5836.12	0	2	0	7	0	7	0.293	0.322		5827.36	0	2	0	7	1	7	0.165	0.302		6046.55	0	2	0	7	3	4	0.162	0.275
	0	1	1	7	5	2	0.331				0	2	0	7	0	7	0.293				0	2	0	7	1	7	0.165				0	2	0	7	3	4	0.162
	0	0	2	7	4	4	0.101				0	0	1	7	3	5	0.057				0	2	0	7	3	5	0.136				0	2	0	7	5	2	0.072
	1	1	0	7	2	6	0.057				0	2	1	7	3	5	0.054				0	2	1	7	0	7	0.072				0	1	1	7	2	6	0.066
6313.88	0	0	2	7	6	2	0.157	0.305		5904.09	0	2	0	7	2	5	0.235	0.499		5938.15	1	1	0	7	1	7	0.335	0.335		6180.02	0	0	2	7	5	2	0.338	0.385
	0	0	2	7	6	2	0.157				0	2	0	7	2	5	0.235				1	1	0	7	1	7	0.335				0	0	2	7	5	2	0.338
	0	0	2	7	4	4	0.148				0	2	0	7	4	3	0.231				1	0	2	7	1	7	0.133				0	2	0	7	5	2	0.148
	0	2	0	7	4	4	0.135				0	1	1	7	5	3	0.124				1	0	0	7	1	7	0.077				0	1	1	7	4	4	0.119
6536.43	1	1	0	7	2	6	0.176	0.291		5942.42	1	1	0	7	0	7	0.22	0.316		6003.84	0	2	0	7	5	3	0.623	0.638		6210.95	1	1	0	7	1	6	0.259	0.361
	1	1	0	7	2	6	0.176				1	1	0	7	0	7	0.22				0	2	0	7	5	3	0.623				1	1	0	7	1	6	0.259
	1	0	1	7	3	4	0.171				1	1	1	7	1	7	0.078				0	1	1	7	6	1	0.077				1	0	1	7	2	6	0.108
	1	0	2	7	2	6	0.116				1	0	2	7	0	7	0.075				0	1	1	7	4	3	0.074				1	0	2	7	1	6	0.089
6618.7	1	1	0	7	4	4	0.472	0.558		6094.7	0	0	2	7	2	5	0.379	0.453		6066.45	0	1	1	7	2	5	0.401	0.57		6378.05	0	2	0	7	7	0	0.523	0.84
	1	1	0	7	4	4	0.472				0	0	2	7	2	5	0.379				0	1	1	7	2	5	0.401				0	2	0	7	7	0	0.523
	1	1	0	7	2	6	0.085				0	2	0	7	2	5	0.129				0	1	1	7	4	3	0.16				0	2	0	7	1	6	0.139
	1	1	1	7	3	4	0.072				0	0	2	7	4	3	0.06				0	1	2	7	5	3	0.044				0	2	0	7	3	4	0.095
6717.87	0	0	2	7	6	2	0.486	0.486		6178.49	0	2	0	7	6	1	0.561	0.755		6156.1	0	0	2	7	5	3	0.14	0.261		6460.05	0	0	2	7	5	2	0.113	0.277
	0	0	2	7	6	2	0.486				0	2	0	7	6	1	0.561				0	2	0	7	3	5	0.165				0	1	1	7	4	4	0.114
	0	1	1	7	7	0	0.062				0	2	0	7	4	3	0.143				0	0	2	7	5	3	0.14				0	0	2	7	5	2	0.113
	0	0	1	7	5	2	0.036				0	1	1	7	7	1	0.092				0	0	2	7	3	5	0.121				0	1	1	7	6	2	0.098
6746.78	0	1	1	7	7	0	0.497	0.747		6236.87	0	1	1	7	5	3	0.147	0.252		6340.49	1	1	0	7	1	7	0.219	0.258		6502.67	0	1	1	7	6	2	0.43	0.434
	0	1	1	7	7	0	0.497				0	1	1	7	5	3	0.147				1	1	0	7	1	7	0.219				0	1	1	7	6	2	0.43
	0	1	1	7	1	6	0.114				0	2	0	7	2	5	0.116				1	0	2	7	1	7	0.105				0	0	2	7	7	0	0.152
	0	1	1	7	3	4	0.076				0	1	1	7	3	5	0.104				1	0	0	7	1	7	0.099				0	2	0	7	7	0	0.071
6769.73	1	0	1	7	5	2	0.422	0.588		6311.98	0	0	2	7	4	3	0.232	0.299		6377.79	0	2	0	7	7	1	0.819	0.821		6539.36	1	1	0	7	1	6	0.214	0.3
	1	0	1	7	5	2	0.422				0	0	2	7	4	3	0.232				0	2	0	7	7	1	0.819				1	1	0	7	1	6	0.214
	1	0	1	7	3	4	0.158				0	1	1	7	5	3	0.215				0	0	2	7	7	1	0.033				1	0	1	7	2	6	0.076
	1	0	2	7	4	4	0.099				0	2	0	7	4	3	0.16				0	1	0	7	7	1	0.021				1	0	1	7	4	4	0.072
6914.42	1	1	0	7	6	2	0.852	0.858		6344.23	1	1	0	7	0	7	0.072	0.25		6428.78	1	1	0	7	3	5	0.34	0.37		6608.53	1	1	0	7	3	4	0.445	0.538
	1	1	0	7	6	2	0.852				1	1	1	7	1	7	0.122				1	1	0	7	3	5	0.34				1	1	0	7	3	4	0.445
	1	0	1	7	7	0	0.03				1	0	2	7	0	7	0.093				1	1	1	7	0	7	0.072				1	1	0	7	5	2	0.073
	2	1	0	7	6	2	0.019				1	0	0	7	0	7	0.078				1	0	2	7	3	5	0.069				1	0	2	7	1	6	0.053
7025.23	1	0	1	7	5	2	0.251	0.571		6433.11	1	1	0	7	0	7	0.256	0.468		6465.48	0	1	1	7	4	3	0.194	0.252		6770.56	1	1	0	7	5	2	0.447	0.767
	1	0	1	7	5	2	0.251				1	1	0	7	0	7	0.256				0	0	2	7	5	3	0.234				1	1	0	7	5	2	0.447
	1	0	1	7	7	0	0.219				1	0	1	7	3	5	0.121				0	1	1	7	4	3	0.194				1	1	0	7	7	0	0.202
	1	0	2	7	6	2	0.103				1	1	0	7	2	5	0.111				0	0	3	7	6	1	0.083				1	0	1	7	6	2	0.081
7117.6	2	0	0	7	2	6	0.613	0.613		6661.85	1	1	0	7	4	3	0.243	0.496		6508.33	0	1	1	7	6	1	0.309	0.417		6867.27	1	0	1	7	4	4	0.393	0.404
	2	0	0	7	2	6	0.613				1	1	0	7	4	3	0.243				0	1	1	7	6	1	0.309				1	0	1	7	4	4	0.393
	2	0	1	7	1	6	0.166				1	1	0	7	2	5	0.149				0	0	2	7	5	3	0.107				1	1	0	7	5	2	0.125
	2	0	1	7	3	4	0.037				1	0	1	7	5	3	0.136				0	2	0	7	5	3	0.107				1	0	2	7	3	4	0.07
7434.2	0	1	2	7	2	6	0.115	0.123		6719.55	0	0	2	7	6	1	0.302	0.471		6679.64	1	0	1	7	2	5	0.36	0.409		7003.12	0	0	2	7	7	0	0.483	0.7
	0	1	2	7	2	6	0.115				0	0	2	7	6	1	0.302				1	0	1	7	2	5	0.36				0	0	2	7	7	0	0.483
	0	2	0	7	2	6	0.101				0	0	2	7	4	3	0.153				1	1	0	7	3	5	0.141				0	0	2	7	1	6	0.097
	0	2	1	7	1	6	0.073				0	0	1	7	5	3	0.094				1	0	2	7	3	5	0.119				0	0	1	7	6	2	0.075
7437.36	2	0	0	7	4	4	0.671	0.673		6737.03	1	1	0	7	2	5	0.375	0.413		6764.97	1	1	0	7	5	3	0.69	0.737		7098.2	1	1	0	7	7	0	0.613	0.871
	2	0	0	7	4	4	0.671				1	1	0	7	2	5	0.375				1	1	0	7	5	3	0.69				1	1	0	7	7	0	0.613
	2	0	1	7	3	4	0.077				1	0	1	7	3	5	0.169				1	0	1	7	6	1	0.058				1	1	0	7	1	6	0.121
	1	0	1	7	7	0	0.029				1	1	1	7	3	5	0.05				1	1	0	7	3	5	0.048				1	1	0	7	3	4	0.069
7456.46	1	0	1	7	7	0	0.533	0.747		6748.5	0	1	1	7	7	1	0.763	0.764		6866.63	1	0	1	7	4	3	0.363	0.591		7116.91	2	0	0	7	1	6	0.4	0.612
	1	0	1	7	7	0	0.533				0	1	1	7	7	1	0.763				1	0	1	7	4	3	0.363				2	0	0	7	1	6	0.4
	1	0	1	7	1	6	0.095				0	2	0	7	6	1	0.04				1	0	1	7	2	5	0.206				2	0	1	7	2	6	0.218
	1	0	1	7	5	2	0.065				0	1	0	7	6	1	0.035				1	0	2	7	5	3	0.105				2	0	0	7	3	4	0.175
7534.75	0	1	1	7	1	6	0.084	0.163		6893.36	2	0	0	7	0	7	0.341	0.523		6894.56	2	0	0	7	1	7	0.506	0.507		7223.42	1	0	1	7	6	2	0.656	0.658
	0	3	0	7	2	6	0.123				2	0	0	7	0	7	0.341				2	0	0	7	1	7	0.506				1	0	1	7	6	2	0.656
	0	1	1	7	1	6	0.084				2	0	1	7	1	7	0.258				2	0	1	7	0	7	0.15				1	0	2	7	5	2	0.032
	0	1	1	7	3	4	0.077				2	0	0	7	6	1	0.075				2	0	1	7	6	1	0.041				1	1	0	7	5	2	0.028
7722.2	0	3	0	7	2	6	0.146	0.21		6914.84	1	1	0	7	6	1	0.53	0.857		7003.13	0	0	2	7	7	1	0.7	0.7		7411.08	2	0	0	7	3	4	0.445	0.804
	0	3	0	7	2	6	0.146				1	1	0	7	6	1	0.53				0	0	2	7	7	1	0.7				2	0	0	7	3	4	0.445
	0	0	2	7	2	6	0.112				1	1	0	7	4	3	0.308				0	0	1	7	6	1	0.054				2	0	0	7	5	2	0.275
	0	3	0	7	4	4	0.062				1	0	1	7	7	1	0.045				0	2	0	7	7	1	0.045				2	0	1	7	4	4	0.104
7731.42	2	0	0	7	6	2	0.866	0.869		7026.7	1	0	1	7	5	3	0.537	0.545		7098.28	1	1	0	7	7	1	0.874	0.875		7433.92	0	1	2	7	1	6	0.1	0.131
	2	0	0	7	6	2	0.866				1	0	1	7	5	3	0.537				1	1	0	7	7	1	0.874				0	2	1	7	2	6	0.119
	1	0	0	7	6	2	0.021				1	0	2	7	6	1	0.101				2	1	0	7	7	1	0.034				0	1	2	7	1	6	0.1
	2	0	1	7	5	2	0.021				1	1	0	7	4	3	0.063				1	2	0	7	7	1	0.018				0	0	3	7	2	6	0.077
7846.84	0	3	0	7	4	4	0.285	0.292		7119.38	0	1	1	7	1	7	0.088	0.088		7119.38	0	1	1	7	0	7	0.06	0.088		7537.03	0	1	1	7	2	6	0.155	0.162
	0	3	0	7	4	4	0.285				0	1	1	7	1	7	0.088				0	1	2	7	1	7	0.078				0	1	1	7	2	6	0.155
	0	2	1	7	5	2	0.226				0	2	1	7	1	7	0.066				0	2	0	7	1	7	0.076				0	3	0	7	1	6	0.078
	0	2	1	7	7	0	0.049				0	0	3	7	1	7	0.062				0	1	1	7	0	7	0.06				0	3	0	7	3	4	0.042
7930.16	0	2	1	7	3	4	0.139	0.215		7234.56	0	0	1	7	1	7	0.084	0.085		7222.59	1	0	1	7	6	1	0.428	0.656		7583.12	2	0	0	7	5	2	0.492	0.859
	0	2	1	7	3	4	0.139				0	0	1	7	1	7	0.084				1	0	1	7	6	1	0.428				2	0	0	7	5	2	0.492
	0	1	2	7	4	4	0.128				0	1	1	7	1	7	0.077				1	0	1	7	4	3	0.209				2	0	0	7	7	0	0.239
	0	3	0	7	2	6	0.075				0	3	0	7	0	7	0.053				1	0	2	7	7	1	0.075				2	0	1	7	6	2	0.065
8086.23	0	3	0	7	6	2	0.17	0.214		7291.9	2	0	0	7	2	5	0.284	0.709		7234.49	0	0	1	7	0	7	0.06	0.085		7705.79	0	3	0	7	1	6	0.119	0.203
	0	3	0	7	6	2	0.17				2	0	0	7	2	5	0.284				0	3	0	7	1	7	0.074				0	2	1	7	4	4	0.128
	1	2	0	7	2	6	0.065				2	0	0	7	0	7	0.232				0	0	2	7	1	7	0.071				0	3	0	7	1	6	0.119
	0	2	1	7	7	0	0.053				2	0	1	7	3	5	0.163				0	1	1	7	0	7	0.068				0	3	0	7	5	2	0.08
8144.82	0	3	0	7	6	2	0.413	0.473		7454.44	1	0	1	7	7	1	0.798	0.798		7295.51	2	0	0	7	3	5	0.699	0.7		7879.61	0	3	0	7	3	4	0.153	0.299
	0	3	0	7	6	2	0.413				1	0	1	7	7	1	0.798				2	0	0	7	3	5	0.699				0	3	0	7	3	4	0.153
	0	2	1	7	7	0	0.101				2	0	1	7	7	1	0.042				2	0	1	7	0	7	0.063				0	2	1	7	4	4	0.109
	0	3	0	7	4	4	0.055				1	0	0	7	6	1	0.028				2	0	1	7	4	3	0.06				0	3	0	7	5	2	0.1
8160.52	0	0	3	7	3	4	0.069	0.139		7477.52	0	3	0	7	0	7	0.076	0.175		7478.3	0	3	0	7	1	7	0.166	0.177		7919.26	2	0	0	7	7	0	0.613	0.881
	1	2	0	7	2	6	0.118				0	3	0	7	0	7	0.076				0	3	0	7	1	7	0.166				2	0	0	7	7	0	0.613
	0	0	3	7	3	4	0.069				0	0	2	7	0	7	0.072				0	0	2	7	1	7	0.068				2	0	0	7	1	6	0.121
	0	0	3	7	5	2	0.062				0	1	1	7	1	7	0.067				0	1	2	7	1	7	0.053				2	0	0	7	3	4	0.076
8248.52	0	2	1	7	5	2	0.093	0.175		7487.86	2	0	0	7	2	5	0.447	0.842		7574.79	2	0	0	7	5	3	0.833	0.837		7942.35	0	3	0	7	3	4	0.183	0.488
	0	2	1	7	5	2	0.093				2	0	0	7	2	5	0.447				2	0	0	7	5	3	0.833				0	3	0	7	3	4	0.183
	0	3	0	7	2	6	0.076				2	0	0	7	4	3	0.324				2	0	1	7	6	1	0.063				0	3	0	7	7	0	0.18
	1	2	0	7	2	6	0.056				2	0	1	7	5	3	0.071				2	0	1	7	2	5	0.023				0	2	1	7	6	2	0.157
8319.5	0	3	0	7	4	4	0.194	0.279		7686.18	0	2	1	7	3	5	0.167	0.175		7692.1	0	3	0	7	3	5	0.183	0.198		8032.85	0	1	2	7	3	4	0.193	0.283
	0	3	0	7	4	4	0.194				0	2	1	7	3	5	0.167				0	3	0	7	3	5	0.183				0	1	2	7	3	4	0.193
	0	1	2	7	6	2	0.171				0	3	0	7	0	7	0.083				0	2	0	7	3	5	0.089				0	3	0	7	5	2	0.114
	0	3	0	7	6	2	0.079				0	3	0	7	2	5	0.06				0	2	1	7	0	7	0.079				0	1	2	7	5	2	0.07
8345.57	1	0	1	7	1	6	0.082	0.132		7731.84	2	0	0	7	6	1	0.553	0.87		7743.27	0	1	1	7	2	5	0.092	0.167		8122.27	0	3	0	7	5	2	0.062	0.125
	1	2	0	7	2	6	0.094				2	0	0	7	6	1	0.553				0	2	1	7	2	5	0.124				1	1	1	7	2	6	0.111
	1	0	1	7	1	6	0.082				2	0	0	7	4	3	0.296				0	3	0	7	3	5	0.117				1	2	0	7	1	6	0.076
	0	0	3	7	5	2	0.082				2	0	1	7	7	1	0.041				0	1	1	7	2	5	0.092				0	3	0	7	5	2	0.062
8404.91	0	0	3	7	5	2	0.29	0.34		7762.85	0	3	0	7	4	3	0.159	0.26		7816.44	1	2	0	7	1	7	0.143	0.144		8189.16	0	3	0	7	5	2	0.178	0.204
	0	0	3	7	5	2	0.29				0	3	0	7	4	3	0.159				1	2	0	7	1	7	0.143				0	3	0	7	5	2	0.178
	1	2	0	7	2	6	0.159				0	1	1	7	3	5	0.146				1	1	0	7	1	7	0.109				0	1	2	7	5	2	0.102
	0	0	3	7	7	0	0.043				0	2	1	7	5	3	0.1				1	1	1	7	0	7	0.052				1	2	0	7	1	6	0.07
8557.59	1	2	0	7	4	4	0.452	0.465		7815.03	1	2	0	7	0	7	0.071	0.118		7919.25	2	0	0	7	7	1	0.88	0.88		8280.14	0	3	0	7	3	4	0.089	0.181
	1	2	0	7	4	4	0.452				1	1	1	7	1	7	0.078				2	0	0	7	7	1	0.88				0	3	0	7	3	4	0.089
	1	1	1	7	3	4	0.073				1	2	0	7	0	7	0.071				1	0	0	7	7	1	0.028				0	2	1	7	2	6	0.057
	1	1	0	7	4	4	0.031				1	1	0	7	0	7	0.06				1	1	0	7	7	1	0.013				0	1	2	7	5	2	0.054
8672.26	0	1	2	7	6	2	0.092	0.17		7871.58	0	3	0	7	4	3	0.128	0.222		7927.91	0	3	0	7	5	3	0.182	0.258		8315.43	0	3	0	7	7	0	0.402	0.685
	1	0	2	7	4	4	0.107				0	3	0	7	4	3	0.128				0	3	0	7	5	3	0.182				0	3	0	7	7	0	0.402
	0	1	2	7	6	2	0.092				0	2	1	7	5	3	0.11				0	0	2	7	3	5	0.097				0	3	0	7	1	6	0.118
	0	2	1	7	5	2	0.082				0	3	0	7	2	5	0.066				0	3	0	7	3	5	0.068				0	3	0	7	3	4	0.117
8697.19	1	1	1	7	5	2	0.14	0.228		8015.61	0	3	0	7	2	5	0.154	0.228		7965.45	0	2	1	7	4	3	0.163	0.31		8350.45	1	2	0	7	1	6	0.133	0.195
	1	1	1	7	5	2	0.14				0	3	0	7	2	5	0.154				0	3	0	7	5	3	0.22				1	0	1	7	2	6	0.14
	0	1	2	7	6	2	0.105				1	0	1	7	1	7	0.067				0	2	1	7	4	3	0.163				1	2	0	7	1	6	0.133
	1	1	1	7	3	4	0.069				0	0	2	7	0	7	0.038				0	2	1	7	2	5	0.106				0	1	2	7	5	2	0.063
8734.2	0	2	1	7	7	0	0.243	0.401		8065.31	0	3	0	7	2	5	0.128	0.219		8035.87	0	3	0	7	1	7	0.138	0.181		8437.71	0	1	2	7	5	2	0.254	0.337
	0	2	1	7	7	0	0.243				0	3	0	7	2	5	0.128				0	3	0	7	1	7	0.138				0	1	2	7	5	2	0.254
	1	1	1	7	5	2	0.074				1	0	1	7	1	7	0.105				1	0	1	7	0	7	0.106				0	1	2	7	7	0	0.08
	0	2	1	7	1	6	0.06				0	3	0	7	0	7	0.076				0	3	0	7	5	3	0.04				0	0	2	7	1	6	0.034
8795.45	1	1	1	7	5	2	0.058	0.17		8121.69	0	3	0	7	6	1	0.363	0.531		8115.66	1	2	0	7	1	7	0.126	0.146		8486.99	0	2	1	7	6	2	0.287	0.292
	1	2	0	7	2	6	0.07				0	3	0	7	6	1	0.363				1	2	0	7	1	7	0.126				0	2	1	7	6	2	0.287
	1	1	1	7	5	2	0.058				0	3	0	7	0	7	0.098				0	2	1	7	2	5	0.082				0	1	2	7	7	0	0.199
	1	1	1	7	3	4	0.056				0	2	1	7	7	1	0.087				0	1	2	7	5	3	0.078				0	3	0	7	7	0	0.106
8805.11	0	0	3	7	7	0	0.226	0.237		8149.56	0	3	0	7	6	1	0.153	0.228		8151.66	0	3	0	7	3	5	0.097	0.194		8548.53	1	2	0	7	3	4	0.164	0.183
	0	0	3	7	7	0	0.226				1	2	0	7	0	7	0.166				1	2	0	7	1	7	0.164				1	2	0	7	3	4	0.164
	0	1	2	7	6	2	0.163				0	3	0	7	6	1	0.153				0	3	0	7	3	5	0.097				1	1	1	7	4	4	0.12
	0	2	1	7	7	0	0.121				0	3	0	7	2	5	0.047				0	1	2	7	5	3	0.062				0	3	0	7	5	2	0.097
8849.1	1	2	0	7	6	2	0.735	0.736		8226.85	0	1	2	7	2	5	0.3	0.4		8271.06	0	0	3	7	2	5	0.333	0.44		8594.4	1	2	0	7	3	4	0.171	0.322
	1	2	0	7	6	2	0.735				0	1	2	7	2	5	0.3				0	0	3	7	2	5	0.333				1	2	0	7	3	4	0.171
	1	1	1	7	7	0	0.073				0	1	2	7	4	3	0.061				0	0	3	7	4	3	0.098				0	0	3	7	6	2	0.137
	1	1	0	7	4	4	0.011				0	0	3	7	5	3	0.048				0	3	0	7	3	5	0.039				0	0	3	7	4	4	0.067
8939.89	2	1	0	7	2	6	0.428	0.429		8311.27	0	3	0	7	4	3	0.237	0.26		8316.68	0	3	0	7	7	1	0.675	0.68		8701.28	1	2	0	7	5	2	0.176	0.393
	2	1	0	7	2	6	0.428				0	3	0	7	4	3	0.237				0	3	0	7	7	1	0.675				1	2	0	7	5	2	0.176
	2	0	1	7	1	6	0.061				0	1	2	7	4	3	0.174				0	1	2	7	7	1	0.042				1	2	0	7	7	0	0.108
	2	0	0	7	2	6	0.043				0	2	1	7	5	3	0.104				0	0	3	7	2	5	0.029				1	1	1	7	4	4	0.097
8990.83	1	1	1	7	5	2	0.324	0.468		8366.11	1	2	0	7	0	7	0.068	0.139		8377.37	1	2	0	7	3	5	0.284	0.287		8749.68	1	2	0	7	5	2	0.225	0.289
	1	1	1	7	5	2	0.324				1	1	1	7	3	5	0.128				1	2	0	7	3	5	0.284				1	2	0	7	5	2	0.225
	1	1	1	7	7	0	0.122				0	3	0	7	2	5	0.1				1	1	1	7	0	7	0.058				1	0	2	7	3	4	0.142
	1	2	0	7	4	4	0.105				1	2	0	7	0	7	0.068				1	1	0	7	3	5	0.053				1	0	2	7	5	2	0.038
9078.62	1	0	2	7	4	4	0.203	0.272		8425.37	1	2	0	7	2	5	0.1	0.281		8435.02	0	1	2	7	5	3	0.151	0.214		8832.91	1	2	0	7	3	4	0.102	0.187
	1	0	2	7	4	4	0.203				0	0	3	7	5	3	0.124				0	1	2	7	5	3	0.151				1	2	0	7	3	4	0.102
	1	1	1	7	3	4	0.074				1	2	0	7	2	5	0.1				0	2	1	7	2	5	0.106				1	2	0	7	5	2	0.076
	1	0	2	7	6	2	0.068				1	2	0	7	4	3	0.075				0	1	2	7	3	5	0.062				1	1	1	7	4	4	0.061
9279.35	2	1	0	7	4	4	0.201	0.258		8522.65	1	2	0	7	4	3	0.051	0.099		8487.52	0	2	1	7	6	1	0.197	0.249		8931.38	2	1	0	7	1	6	0.201	0.334
	2	1	0	7	4	4	0.201				1	0	1	7	3	5	0.09				0	2	1	7	6	1	0.197				2	1	0	7	1	6	0.201
	2	0	1	7	3	4	0.124				1	2	0	7	4	3	0.051				0	1	2	7	7	1	0.153				2	1	0	7	3	4	0.124
	2	1	0	7	2	6	0.057				1	1	1	7	3	5	0.049				0	3	0	7	5	3	0.136				1	0	2	7	5	2	0.08
9289.74	0	0	3	7	7	0	0.348	0.503		8586.82	1	2	0	7	0	7	0.119	0.187		8529.45	0	2	1	7	4	3	0.046	0.076		8952.91	1	2	0	7	7	0	0.138	0.234
	0	0	3	7	7	0	0.348				1	2	0	7	0	7	0.119				1	1	1	7	2	5	0.068				1	2	0	7	7	0	0.138
	0	0	2	7	6	2	0.082				1	1	1	7	5	3	0.051				1	2	0	7	1	7	0.054				0	1	2	7	7	0	0.136
	0	0	3	7	1	6	0.066				2	0	0	7	0	7	0.047				1	0	2	7	3	5	0.047				0	0	3	7	6	2	0.107
9335.55	2	1	0	7	4	4	0.171	0.187		8659.3	1	2	0	7	2	5	0.255	0.324		8571.69	0	0	3	7	4	3	0.158	0.218		8974.88	1	0	2	7	5	2	0.231	0.287
	2	1	0	7	4	4	0.171				1	2	0	7	2	5	0.255				0	0	3	7	4	3	0.158				1	0	2	7	5	2	0.231
	0	3	0	7	2	6	0.053				1	1	1	7	5	3	0.044				0	2	1	7	4	3	0.067				2	1	0	7	1	6	0.089
	0	2	1	7	1	6	0.037				1	2	0	7	4	3	0.035				0	1	2	7	5	3	0.046				1	2	0	7	7	0	0.06
9362.84	2	1	0	7	4	4	0.186	0.282		8683.97	0	1	2	7	4	3	0.154	0.217		8602.51	1	2	0	7	3	5	0.189	0.244		8992.56	0	0	3	7	6	2	0.259	0.26
	2	1	0	7	4	4	0.186				0	1	2	7	4	3	0.154				1	2	0	7	3	5	0.189				0	0	3	7	6	2	0.259
	2	1	0	7	2	6	0.094				0	0	3	7	5	3	0.099				0	0	3	7	4	3	0.075				1	2	0	7	7	0	0.232
	2	0	1	7	1	6	0.037				0	1	2	7	6	1	0.049				1	1	1	7	2	5	0.039				0	1	2	7	5	2	0.049
9394.49	0	2	1	7	3	4	0.078	0.114		8693.35	2	1	0	7	0	7	0.23	0.305		8682.89	2	1	0	7	1	7	0.311	0.314		9089.56	0	1	2	7	7	0	0.275	0.407
	0	1	2	7	2	6	0.081				2	1	0	7	0	7	0.23				2	1	0	7	1	7	0.311				0	1	2	7	7	0	0.275
	0	2	1	7	3	4	0.078				1	2	0	7	2	5	0.059				1	2	0	7	5	3	0.124				1	2	0	7	7	0	0.159
	0	4	0	7	2	6	0.057				2	1	0	7	4	3	0.032				2	0	0	7	1	7	0.015				0	1	1	7	6	2	0.059
9408.89	1	1	1	7	7	0	0.506	0.706		8728.88	0	2	1	7	7	1	0.478	0.484		8707.02	1	2	0	7	5	3	0.487	0.498		9182.85	1	1	1	7	6	2	0.535	0.549
	1	1	1	7	7	0	0.506				0	2	1	7	7	1	0.478				1	2	0	7	5	3	0.487				1	1	1	7	6	2	0.535
	1	1	1	7	1	6	0.094				1	2	0	7	4	3	0.049				2	1	0	7	1	7	0.081				1	2	0	7	7	0	0.05
	1	1	1	7	3	4	0.056				0	3	0	7	6	1	0.047				1	1	1	7	6	1	0.045				1	2	0	7	5	2	0.042
9469.94	1	0	2	7	6	2	0.444	0.445		8805.03	0	0	3	7	7	1	0.152	0.245		8832.77	1	1	1	7	2	5	0.275	0.48		9236.35	1	0	2	7	7	0	0.138	0.268
	1	0	2	7	6	2	0.444				0	0	3	7	7	1	0.152				1	1	1	7	2	5	0.275				1	0	2	7	7	0	0.138
	2	0	1	7	5	2	0.052				0	1	2	7	6	1	0.13				1	1	1	7	4	3	0.191				1	0	2	7	5	2	0.101
	1	1	1	7	5	2	0.037				0	0	3	7	5	3	0.093				1	0	2	7	5	3	0.106				2	0	1	7	4	4	0.092
9543.54	2	0	1	7	5	2	0.372	0.564		8849.95	1	2	0	7	6	1	0.51	0.728		8937.08	1	1	1	7	2	5	0.11	0.165		9291.92	2	1	0	7	1	6	0.148	0.256
	2	0	1	7	5	2	0.372				1	2	0	7	6	1	0.51				1	1	1	7	2	5	0.11				2	1	0	7	1	6	0.148
	2	0	1	7	3	4	0.184				1	2	0	7	4	3	0.195				1	0	2	7	3	5	0.088				2	0	1	7	2	6	0.062
	2	1	0	7	4	4	0.051				1	1	1	7	7	1	0.053				1	0	2	7	5	3	0.062				1	0	2	7	7	0	0.049
9573.3	0	4	0	7	2	6	0.097	0.149		8880.79	1	0	2	7	2	5	0.322	0.377		8954.66	1	2	0	7	7	1	0.277	0.282		9334.56	2	1	0	7	3	4	0.157	0.2
	0	4	0	7	2	6	0.097				1	0	2	7	2	5	0.322				1	2	0	7	7	1	0.277				2	1	0	7	3	4	0.157
	0	1	2	7	2	6	0.053				1	1	1	7	3	5	0.048				0	1	2	7	7	1	0.128				0	2	1	7	2	6	0.061
	0	4	0	7	4	4	0.045				1	2	0	7	2	5	0.044				0	0	3	7	6	1	0.07				0	3	0	7	3	4	0.029
9607.52	2	1	0	7	6	2	0.792	0.814		9000.02	1	1	1	7	5	3	0.286	0.348		8991.04	1	2	0	7	7	1	0.264	0.291		9361.26	2	1	0	7	3	4	0.248	0.279
	2	1	0	7	6	2	0.792				1	1	1	7	5	3	0.286				1	2	0	7	7	1	0.264				2	1	0	7	3	4	0.248
	2	0	1	7	7	0	0.028				1	2	0	7	2	5	0.085				0	0	3	7	6	1	0.168				2	0	1	7	2	6	0.03
	2	1	0	7	4	4	0.022				1	2	0	7	4	3	0.075				0	0	3	7	4	3	0.084				2	0	0	7	1	6	0.022
9675.68	0	4	0	7	4	4	0.135	0.172		9012.74	0	2	1	7	1	7	0.098	0.099		9012.74	0	2	1	7	0	7	0.075	0.1		9402	0	2	1	7	2	6	0.074	0.094
	0	4	0	7	4	4	0.135				0	2	1	7	1	7	0.098				0	2	1	7	0	7	0.075				0	2	1	7	2	6	0.074
	0	2	1	7	5	2	0.032				0	2	0	7	0	7	0.035				0	2	0	7	1	7	0.048				0	1	1	7	2	6	0.055
	0	0	3	7	1	6	0.028				0	3	0	7	0	7	0.034				0	3	0	7	1	7	0.039				0	1	2	7	1	6	0.052
9767.51	2	0	1	7	5	2	0.274	0.566		9053.33	1	0	2	7	4	3	0.182	0.252		9075.03	2	1	0	7	1	7	0.07	0.118		9490.48	2	1	0	7	5	2	0.512	0.734
	2	0	1	7	5	2	0.274				1	0	2	7	4	3	0.182				2	1	0	7	1	7	0.07				2	1	0	7	5	2	0.512
	2	0	1	7	7	0	0.209				1	0	2	7	2	5	0.066				0	1	2	7	1	7	0.062				2	1	0	7	7	0	0.15
	2	1	0	7	4	4	0.064				2	0	0	7	0	7	0.042				2	0	0	7	1	7	0.049				2	0	1	7	6	2	0.066
										9087.06	1	0	2	7	4	3	0.068	0.11		9089.29	0	1	2	7	7	1	0.387	0.393		9552.82	0	4	0	7	5	2	0.067	0.121
											0	1	2	7	0	7	0.075				0	1	2	7	7	1	0.387				0	1	2	7	3	4	0.068
											1	0	2	7	4	3	0.068				1	2	0	7	7	1	0.27				0	4	0	7	5	2	0.067
											0	1	1	7	1	7	0.066				0	1	1	7	6	1	0.052				0	4	0	7	1	6	0.054
										9110.76	2	1	0	7	4	3	0.04	0.115		9106.47	2	1	0	7	1	7	0.054	0.093		9622.47	2	0	1	7	4	4	0.373	0.386
											2	1	0	7	4	3	0.04				2	1	0	7	1	7	0.054				2	0	1	7	4	4	0.373
											2	1	0	7	6	1	0.035				0	3	0	7	1	7	0.045				2	1	0	7	5	2	0.094
											0	1	1	7	1	7	0.035				0	1	1	7	0	7	0.044				2	1	0	7	3	4	0.052
										9168.05	2	1	0	7	0	7	0.259	0.478		9160.05	2	1	0	7	3	5	0.368	0.406		9719.65	1	0	2	7	7	0	0.439	0.609
											2	1	0	7	0	7	0.259				2	1	0	7	3	5	0.368				1	0	2	7	7	0	0.439
											2	1	0	7	4	3	0.1				1	1	1	7	6	1	0.041				1	0	2	7	1	6	0.077
											2	1	0	7	2	5	0.077				2	1	0	7	1	7	0.035				2	1	0	7	7	0	0.074
										9276.91	0	0	2	7	0	7	0.056	0.074		9184.74	1	1	1	7	6	1	0.263	0.504		9733.67	0	4	0	7	5	2	0.11	0.198
											0	0	2	7	0	7	0.056				1	1	1	7	6	1	0.263				0	4	0	7	5	2	0.11
											0	2	1	7	1	7	0.031				1	1	1	7	4	3	0.24				0	4	0	7	7	0	0.049
											1	1	1	7	1	7	0.029				1	2	0	7	5	3	0.111				0	2	1	7	2	6	0.035
										9288.4	0	0	3	7	7	1	0.585	0.586		9254.83	1	0	2	7	5	3	0.308	0.336		9769.25	2	1	0	7	7	0	0.471	0.658
											0	0	3	7	7	1	0.585				1	0	2	7	5	3	0.308				2	1	0	7	7	0	0.471
											0	2	1	7	7	1	0.071				2	1	0	7	3	5	0.043				2	1	0	7	1	6	0.084
											0	0	2	7	6	1	0.067				1	1	1	7	2	5	0.038				2	1	0	7	3	4	0.054
										9392.34	2	1	0	7	2	5	0.155	0.335		9278.07	0	0	2	7	1	7	0.073	0.074		9771.46	0	4	0	7	1	6	0.132	0.258
											1	1	1	7	7	1	0.252				0	0	2	7	1	7	0.073				0	4	0	7	1	6	0.132
											2	1	0	7	2	5	0.155				0	4	0	7	1	7	0.047				0	4	0	7	7	0	0.097
											2	1	0	7	4	3	0.11				0	2	1	7	0	7	0.031				2	1	0	7	7	0	0.078
										9415.26	1	1	1	7	7	1	0.468	0.478		9433.08	2	1	0	7	5	3	0.328	0.365
											1	1	1	7	7	1	0.468				2	1	0	7	5	3	0.328
											2	1	0	7	2	5	0.063				2	0	1	7	2	5	0.225
											2	0	1	7	5	3	0.058				2	0	0	7	3	5	0.041
										9473.71	1	0	2	7	6	1	0.265	0.43		9491.06	2	1	0	7	5	3	0.397	0.498
											1	0	2	7	6	1	0.265				2	1	0	7	5	3	0.397
											1	0	2	7	4	3	0.157				2	1	0	7	3	5	0.1
											1	0	1	7	5	3	0.077				2	0	1	7	2	5	0.069
										9492.67	2	1	0	7	2	5	0.226	0.256		9503.09	0	4	0	7	1	7	0.07	0.154
											2	1	0	7	2	5	0.226				0	4	0	7	1	7	0.07
											2	0	1	7	3	5	0.177				0	4	0	7	3	5	0.069
											2	1	0	7	0	7	0.029				0	0	2	7	1	7	0.052
										9519.25	0	4	0	7	2	5	0.072	0.154		9609.52	2	0	1	7	4	3	0.08	0.145
											0	4	0	7	2	5	0.072				2	0	1	7	4	3	0.08
											0	0	3	7	1	7	0.062				2	0	1	7	2	5	0.061
											0	0	2	7	0	7	0.061				0	2	1	7	2	5	0.04
										9574.41	0	4	0	7	4	3	0.087	0.104		9624.59	2	0	1	7	4	3	0.072	0.132
											0	4	0	7	4	3	0.087				2	0	1	7	4	3	0.072
											0	2	1	7	3	5	0.067				0	3	0	7	3	5	0.059
											0	3	0	7	2	5	0.053				2	0	1	7	2	5	0.059
										9607.33	2	1	0	7	6	1	0.482	0.836		9632.47	2	0	1	7	4	3	0.168	0.284
											2	1	0	7	6	1	0.482				2	0	1	7	4	3	0.168
											2	1	0	7	4	3	0.346				2	0	1	7	2	5	0.107
											2	0	1	7	7	1	0.037				0	3	0	7	3	5	0.025
										9646.78	1	1	1	7	1	7	0.026	0.027		9657.8	2	0	1	7	2	5	0.041	0.096
											1	1	1	7	1	7	0.026				2	0	1	7	2	5	0.041
											2	0	1	7	1	7	0.018				2	0	1	7	4	3	0.028
											2	1	0	7	0	7	0.017				2	0	1	7	0	7	0.025
